# Supplementary material for: Enablers and barriers to the implementation of socially assistive humanoid robots in health and social care: a systematic review
Source: PubMed Central journal article supplement (PMC6955545; doi:10.1136/bmjopen-2019-033096), 2020-01-09
Supplement: bmjopen-2019-033096.draft_revisions.pdf [file bmjopen-2019-033096.draft_revisions.pdf]

# BMJ Open

BMJ Open is committed to open peer review. As part of this commitment we make the peer review history of every article we publish publicly available.

When an article is published we post the peer reviewers' comments and the authors' responses online. We also post the versions of the paper that were used during peer review. These are the versions that the peer review comments apply to.

The versions of the paper that follow are the versions that were submitted during the peer review process. They are not the versions of record or the final published versions. They should not be cited or distributed as the published version of this manuscript.

BMJ Open is an open access journal and the full, final, typeset and author-corrected version of record of the manuscript is available on our site with no access controls, subscription charges or pay-per-view fees (<http://bmjopen.bmj.com>).

If you have any questions on BMJ Open's open peer review process please email [info.bmjopen@bmj.com](mailto:info.bmjopen@bmj.com)

# BMJ Open

## A systematic review of enablers and barriers to the implementation of Socially Assistive Humanoid Robots in health and social care

|                               |                                                                                                                                                                                                                                                                                                                                                                                                                 |
|-------------------------------|-----------------------------------------------------------------------------------------------------------------------------------------------------------------------------------------------------------------------------------------------------------------------------------------------------------------------------------------------------------------------------------------------------------------|
| Journal:                      | <i>BMJ Open</i>                                                                                                                                                                                                                                                                                                                                                                                                 |
| Manuscript ID                 | bmjopen-2019-033096                                                                                                                                                                                                                                                                                                                                                                                             |
| Article Type:                 | Research                                                                                                                                                                                                                                                                                                                                                                                                        |
| Date Submitted by the Author: | 19-Jul-2019                                                                                                                                                                                                                                                                                                                                                                                                     |
| Complete List of Authors:     | Papadopoulos, Rena; Middlesex University, Research Centre for Transcultural Studies in Health<br>Koulouglioti, Christina; Middlesex University, Research Centre for Transcultural Studies in Health; Western Sussex Hospitals NHS Foundation Trust, Research and Innovation<br>lazzarino, runa; Middlesex University,<br>Ali, Sheila; Middlesex University, Research Centre for Transcultural Studies in Health |
| Keywords:                     | Socially assistive humanoid robots, artificial intelligence, health and social care, older adults, systematic review                                                                                                                                                                                                                                                                                            |
|                               |                                                                                                                                                                                                                                                                                                                                                                                                                 |

SCHOLARONE™  
Manuscripts

1  
2  
3  
4  
5  
6  
7  
8  
9  
10  
11  
12  
13  
14  
15  
16  
17  
18  
19  
20  
21  
22  
23  
24  
25  
26  
27  
28  
29  
30  
31  
32  
33  
34  
35  
36  
37  
38  
39  
40  
41  
42  
43  
44  
45  
46  
47  
48  
49  
50  
51  
52  
53  
54  
55  
56  
57  
58  
59  
60

**Article title**

A systematic review of enablers and barriers to the implementation of Socially Assistive Humanoid Robots in health and social care

For peer review only

## Abstract

**Objectives:** socially assistive humanoid robots are considered a promising technology to tackle the challenges in health and social care posed by the growth of the ageing population. The purpose of our study was to explore the current evidence on barriers and enablers for the implementation of these robots in health and social care.

**Design:** Systematic review of studies entailing hands-on interactions with a robot

**Setting:** Ten databases were searched using a combination of the same search terms. Data collection was conducted by using *Rayyan* software, a standardised predefined grid and quality assessment by a risk of bias and a quality assessment tool.

**Participants:** Older adults (n=212) aged  $\geq 60$  years, with no or some degree of age-related cognitive impairment, residing either in residential care facilities or at their home. Care home staff (n=98) and informal caregivers (n=7).

**Primary outcomes:** identification of enablers and barriers to the implementation of socially assistive humanoid robots in health and social care, and consequent insights and impact. Future developments to inform further research.

**Results:** Eight studies met the eligibility criteria and were included. Within this limited evidence base, the enablers found were enjoyment, usability, personalisation, and familiarisation. Barriers were related to technical problems, to the robots' limited capabilities, and the negative preconceptions towards the use of robots in healthcare. Factors which produced mixed results were the robot's human-like attributes, previous experience with technology, and views of formal and informal carers.

**Conclusions:** the available evidence related to implementation factors of socially assistive humanoid robots for older adults is limited, mainly focusing on aspects at individual level, and exploring acceptance of this technology. Investigation of elements linked to the environment, organisation, societal and cultural milieu, policy and legal framework is necessary.

**Protocol registration:** Prospero CRD42018092866.

### Strengths and limitations of this study

- This review is the first to date focusing on the issues related to the pragmatic implementation of socially assistive humanoid robots in health and social care settings catering to the needs of older adults.
- Quality assessment of the included studies was based on two combined tools to take account the heterogeneity of the underlying study designs.
- Three authors were involved in critical steps of the review (article selection, data abstraction, quality assessment of the included studies), and this constitutes a strength of the study.
- The heterogeneity between studies on key issues such as participants' cognitive health and residential context, study designs and outcomes, prevents quantitative synthesis and hampers consistent assessment of the implementation of socially assistive humanoid robots in health and social care.

Peer review only

## INTRODUCTION

### Rationale

The current global landscape in health and social care is highly challenging, demanding innovative and effective actions from policy makers and service providers. For example, it is projected that by 2050 the world's population over the age of 60 years will be about two billion, an increase of 900 million from 2015. [1] Shortages of health care professionals and a growing ageing population place enormous pressures onto the health and social care systems of many countries. Older adults are living longer with chronic problems and/or disabilities. At the same time, the size of formal and informal healthcare workforce is shrinking.

The use of artificial intelligence (AI) and robotics provides a major opportunity towards meeting some of the care needs of older adults. [2] An advanced form of AI is the one used in Socially Assistive Humanoid Robots (SAHRs). These robots use gestures, speech, facial recognition, movements, and -in general- social interaction to assist their users. The robot's goal is to create close and effective interaction with the human user for the purpose of giving assistance and achieving measurable progress in convalescence, rehabilitation, learning, and well-being.

In a systematic review of the literature about the use of different available technologies directed to assist older adults, robotic devices and robots were viewed as an encouraging technology that can assist and prolong older adults' independent living. [3] Corroborating this finding, a few additional reviews of the literature have indicated that: (i) SAHRs could have multiple roles in the care of older adults, such as in affective therapy and cognitive training [4] and (ii) they could be beneficial in reducing anxiety, agitation, loneliness, and improving

1  
2  
3  
4  
5 quality of life, engagement, and interaction (especially when used as a therapeutic tool when  
6  
7 caring for patients with dementia). [5–7] In addition, reviews related to the acceptance of  
8  
9 robots, have found it being influenced by numerous factors, such as the perceived need for  
10  
11 the technology, the user's previous experiences with it, age, level of education, expectations  
12  
13 about what the technology can do, attitudes and cultural background; [8] in fact, robots that  
14  
15 were considered nearer to a person's culture were more easily accepted by users. [9]  
16  
17 Furthermore, a review of qualitative studies on older adults' experiences with socially  
18  
19 assistive robots revealed the complexity of issues associated with their use with older adults  
20  
21 and how these impacted on their attitudes towards robots. [10] For example, issues related to  
22  
23 the 'role' that the robot could acquire and to the nature of the Human-Robot Interaction  
24  
25 (HRI) revealed a mixture of opinions and emotions. Parallel enquires among health and  
26  
27 social care professionals have identified various areas where humanoid and animal-like  
28  
29 robots can be helpful, but reported mixed views about their use in health care settings, raising  
30  
31 issues of staff and patients' safety, and the protection of their privacy. [11] On a similar note,  
32  
33 a recent qualitative exploration among different stakeholders in the healthcare context  
34  
35 revealed that ethical and legal challenges, the lack of interests from professionals and  
36  
37 patients, and concerns related to the robot's appearance and robotic expectations were major  
38  
39 barriers to their potential use. [12] Frennert *et al*'s review [13] focused mainly on concerns  
40  
41 that need attention when considering the social robots and older adults interface, and urged  
42  
43 developers to adopt a more pragmatic and realistic idea of an older adult. Their  
44  
45 recommendations addressed the inclusion of older adults in the development process without  
46  
47 considering them incapable of expressing their needs and offering possible solutions to their  
48  
49 own problems.  
50  
51  
52  
53  
54  
55  
56  
57  
58  
59  
60

1  
2  
3  
4  
5 All current reviews shed some light on certain aspects of this complicated relationship: older  
6 adults and socially assistive robots. However, in order to effectively meet the care needs of an  
7 ageing population, it is imperative to identify and disseminate the full range of evidence-  
8 based information of this form of technology. Such evidence will enable people to discuss the  
9 possible solutions offered by SAHRs, in a more measured and informed way. This is  
10 particularly important in our days since public attitudes towards robots are influenced by the  
11 media, often in negative ways. As an instance, many people believe that robots will take over  
12 their jobs, that robots will be dangerous, or that they are incapable of providing care that is  
13 culturally appropriate and compassionate. [14–17]  
14  
15  
16  
17  
18  
19  
20  
21  
22  
23  
24  
25  
26

## 27 **Objective**

28  
29  
30 Our review aims to understand what the current enablers and barriers to the use and  
31 implementation of SAHRs are and concentrates on articles that describe the actual use of  
32 SAHRs among older adults. The primary focus is on exploring and identifying the factors  
33 that might facilitate or hinder the implementation of SAHRs in health and social care for  
34 older adults.  
35  
36  
37  
38  
39  
40  
41  
42

## 43 **METHODS**

### 44 **Information sources and search strategies**

45  
46  
47 The search strategy was developed for MEDLINE with appropriate modifications to match  
48 the terminology used in other databases. Subject headings and free text terms were used  
49 according to the specific requirements of each database. Table 1 presents full search strategy  
50 with search terms across the following bibliographic electronic databases: the Cochrane  
51 Central Register of Controlled Trials (CENTRAL); 2017 MEDLINE via OVID; Embase via  
52  
53  
54  
55  
56  
57  
58  
59  
60



1  
2  
3  
4  
5 OVID; Science Citation Index; CINAHL (Cumulative Index to Nursing and Allied Health  
6  
7 Literature); LILACS (Latin American and Caribbean Health Sciences Information database);  
8  
9 IEEE Xplore digital library; PsycINFO; Google Scholar; European Commission and  
10  
11 Eurobarometer. We also conducted the following additional searches: ACM Digital Library,  
12  
13 Computer Source Lecture Notes in Computer Science; Science Direct. In addition to  
14  
15 traditional searching, reverse citation screening of the reference lists of relevant articles (ie,  
16  
17 including the key terms such as socially assistive robots and home care) and forward citations  
18  
19 (articles which have cited the identified papers) were conducted. In view of the recent  
20  
21 adoption of this form of technology, we limited the search date to the previous ten years. The  
22  
23 references of eligible reports and key review articles were examined for other potentially  
24  
25 relevant studies.  
26  
27  
28  
29  
30  
31  
32

---

33 **Table 1.** Core set of search terms

---

34 "socially assistive robot\*" OR "socially assist\*" OR "social assist\*" AND robot\*

35  
36 AND "social care" OR "home care services" OR "home care" OR "care home\*" OR  
37  
38 "nursing home\*" OR "residential facilit\*" OR "assisted living facilit\*" OR "group home\*" OR  
39  
40 "home\* for the aged" OR "community health services" OR "self-help devices" OR  
41  
42 self\* AND care\* AND management AND help OR "social support" OR "interpersonal  
43  
44 relations" OR "nursing care" OR "point of care" OR "aged care" OR "activities of daily  
45  
46 living" OR care\* OR healthcare OR social\*

47 NOT Animals NOT Infant OR Child\* OR pediatr\* OR paediatr\*

---

48  
49  
50  
51 All records were uploaded into Rayyan software, a systematic review software, similar to  
52  
53 Covidence, [18] for managing citations for title and abstract screening and study  
54  
55 selection.[19] The software was used for the process of de-duplicating, and independently  
56  
57 exploring, screening abstracts and full texts, excluding and including studies based on pre-  
58  
59  
60

1  
2  
3  
4  
5 specified criteria. Any disagreements regarding eligibility were discussed, and if required a  
6  
7 third researcher was consulted, and consensus reached. Figure 1 summarises the selection of  
8  
9 studies in accordance with PRISMA guidelines. [23]  
10  
11

### 12 13 **Selection criteria**

14  
15  
16 Studies that considered the application of SAHRs in health and social care were included.  
17  
18 These were not restricted to experimental designs (Table 2). In view of the likelihood of a  
19  
20 paucity of potentially eligible studies relevant to this clinical topic, we also considered  
21  
22 observational, cohort, case-control, and qualitative studies. Editorials, conference abstracts,  
23  
24 and opinion pieces were excluded. Only adult and older adult care settings relevant to SAHRs  
25  
26 and with social or interactive elements were included (eg, long term, rehabilitation, inpatient  
27  
28 and outpatient hospital care, community, and social care). The target population included all  
29  
30 stakeholders who were part of the process of implementation of SAHRs in health and social  
31  
32 care in the broadest perspective (eg, users, staff, caregivers), and it was not limited to the  
33  
34 aged population. Studies that included any type of exposure to SAHRs were selected.  
35  
36  
37  
38  
39  
40

### 41 **Assessment of risk of bias and quality of included studies**

42  
43  
44  
45 The quality of studies was assessed for all included studies with the following two  
46  
47 assessments tools: the Cochrane Collaboration's tool for assessing risk of bias [24] and the  
48  
49 Critical Appraisal for Public Health [25] (Table 2). Both tools were completed for each study.  
50  
51 Two researchers independently assessed 40% of included studies and compared their results  
52  
53 in order to ensure the validity and reliability of the process. Disagreements were resolved via  
54  
55 the involvement of a third member of the research team and group discussions.  
56  
57  
58  
59

### 60 **Data extraction and synthesis of the results**

1  
2  
3  
4  
5 Study details and outcome data were collected independently by two researchers with a  
6  
7 piloted data extraction form (see supplementary file 1). The process was validated by  
8  
9 assessing the data extraction form on a small number of studies ( $n = 3$ ) that two researchers  
10  
11 assessed independently and compared. Type of study/design, date of publication, country and  
12  
13 specific setting (ie, care facility), intervention (ie, type of SAHR), sample and characteristics  
14  
15 of participants, and primary outcomes were identified (Table 3). Primary outcomes entailed  
16  
17 the identification of enablers and barriers to the implementation of SAHRs in health and  
18  
19 social care. Barriers were defined as those impeding the implementation of SAHRs which  
20  
21 may include factors, issues, or themes at local, system, or policy level. Enablers were defined  
22  
23 as mechanisms and initiatives whereby patients, providers, or policy makers contribute to  
24  
25 facilitating the positive uptake and implementation of a SAHR.  
26  
27  
28  
29  
30  
31  
32  
33  
34  
35  
36  
37  
38  
39  
40  
41  
42  
43  
44  
45  
46  
47  
48  
49  
50  
51  
52  
53  
54  
55  
56  
57  
58  
59  
60

**Table 2.** Risk of bias and quality assessment of included studies

| Authors<br>Year              | Selection Bias<br><br>Random<br>Sequence<br>Generation <sup>1</sup> | Allocation<br>Concealmen<br>t | Performance<br>Bias<br><br>Blinding of<br>Participants and<br>Personnel | Detection Bias<br><br>Blinding of<br>Outcome<br>Assessment | Attrition<br>Bias<br><br>Incomplete<br>Outcome<br>Data | Reporting<br>Bias<br><br>Selective<br>Reporting | Other Bias<br>and Limitations <sup>2</sup>                                                                                                            |
|------------------------------|---------------------------------------------------------------------|-------------------------------|-------------------------------------------------------------------------|------------------------------------------------------------|--------------------------------------------------------|-------------------------------------------------|-------------------------------------------------------------------------------------------------------------------------------------------------------|
| 1 Bedaf et al.,<br>(2017)    | –                                                                   | –                             | –                                                                       | –                                                          | –                                                      | –                                               | Self-report measures; no fidelity checks reported; small sample; gender imbalance; two-time interaction; not real home                                |
| 2 Beuscher et al., (2017)    | –                                                                   | –                             | –                                                                       | –                                                          | –                                                      | –                                               | Self-report measures; self-selected, very small, and WEIRD <sup>3</sup> sample; no fidelity checks reported; SAHR small in size; one-time interaction |
| 3 Caleb-Solly et al., (2018) | –                                                                   | –                             | –                                                                       | –                                                          | –                                                      | –                                               | Not clear statistics; sampling unclear; small sample; no ethics reported; no fidelity checks reported                                                 |

<sup>1</sup> None of the studies was an RCT, therefore no randomization was present. This also affects general quality of the studies, which overall were at high risk of all types of bias, with some exception in Attrition and Reporting bias only.

<sup>2</sup> Incorporation of evaluations conducted with Critical Appraisal for Public Health Checklist (Heller et al. 2007).

<sup>3</sup> WEIRD stands for Western Educate Industrialised Rich Democratic.

1  
2  
3  
4  
5  
6  
7  
8  
9  
10  
11  
12  
13  
14  
15  
16  
17  
18  
19  
20  
21  
22  
23  
24  
25  
26  
27  
28  
29  
30  
31  
32  
33  
34  
35  
36  
37  
38  
39  
40  
41  
42  
43  
44  
45  
46

| 4            | Hebesberger et al., (2017)                   | -                      | -                                                          | -                                                | -                                         | -                                     | -                          | Sampling unclear; small sample; lack of validity of both qualitative and quantitative measures; low return on missing data                                       |
|--------------|----------------------------------------------|------------------------|------------------------------------------------------------|--------------------------------------------------|-------------------------------------------|---------------------------------------|----------------------------|------------------------------------------------------------------------------------------------------------------------------------------------------------------|
| 5            | Khosla et al., (2017)                        | -                      | -                                                          | -                                                | -                                         | -                                     | +                          | Not same cohort and not same RCF throughout the study; no fidelity checks reported; no ethics reported                                                           |
| Authors Year | Selection Bias<br>Random Sequence Generation | Allocation Concealment | Performance Bias<br>Blinding of Participants and Personnel | Detection Bias<br>Blinding of Outcome Assessment | Attrition Bias<br>Incomplete Outcome Data | Reporting Bias<br>Selective Reporting | Other Bias and Limitations |                                                                                                                                                                  |
| 6            | Loi et al., (2017)                           | -                      | -                                                          | -                                                | -                                         | -                                     | -                          | Self-report measures; very small sample; low response rate; one-group design; large drop out at follow up; exposure poorly measured; no fidelity checks reported |
| 7            | Louie et al., (2014)                         | -                      | -                                                          | -                                                | -                                         | -                                     | +                          | Self-report measures; sampling unclear; small, gender imbalanced sample; low response rate; no ethics reported                                                   |
| 8            | Wu et al., (2014)                            | -                      | -                                                          | -                                                | -                                         | +                                     | +                          | Partly self-selected sample; no fidelity checks reported                                                                                                         |

1  
2  
3  
4  
5  
6  
7  
8  
9  
10  
11  
12  
13  
14  
15  
16  
17  
18  
19  
20  
21  
22  
23  
24  
25  
26  
27  
28  
29  
30  
31  
32  
33  
34  
35  
36  
37  
38  
39  
40  
41  
42  
43  
44  
45  
46

---

+ = low risk of bias; - = high risk of bias

For peer review only

1  
2  
3  
4  
5 The heterogeneity of the studies included in this review did not enable a standard quantitative  
6  
7 synthesis (ie, meta-analysis) to be performed. Instead, a narrative synthesis of the results was  
8  
9 conducted and presented in the form of a summary table (Table 3) and figure (Figure 2). All  
10  
11 results were discussed and weighted by three researchers with the aim of identifying a  
12  
13 frequency-based ranking of importance in relation to enablers, barriers, and mixed  
14  
15 results. Any uncertainties were resolved via a consensus-based decision. The protocol for this  
16  
17 systematic review has been registered and published on PROSPERO (ID:  
18  
19 CRD42018092866). Ethics approval was not required for this research.  
20  
21  
22  
23

## 24 25 **RESULTS**

### 26 27 28 **Search results and included studies**

29  
30  
31 A total of eight studies were included in our analyses: four mixed-method, non-randomised  
32  
33 user experience trials; [26–29] two pre-post experimental surveys; [30,31] one mixed-  
34  
35 method, longitudinal experience trial; [32] one post-experimental survey [33] (Figure 1.  
36  
37 PRISMA Flow Chart).  
38  
39  
40  
41

### 42 43 **Quality of studies**

44  
45 The identified studies were of low quality, and all had high risks of biases, typical of non-  
46  
47 randomised, quasi-experimental design (Table 2). For example, many studies had no  
48  
49 comparator and no baseline. [26–29,32] Additional methodological limitations affecting the  
50  
51 studies were: very small samples' sizes, with only one study involving more than 100  
52  
53 participants; [32] and self-report measures, [26,30,31,33] not always in combination with  
54  
55 observation and/or data retrieved from the robot. [27–29,32] Three studies only [29,31,32]  
56  
57 used validated instruments informed by existing theoretical model; [34,35] two studies  
58  
59  
60

1  
2  
3  
4  
5 reported the drop-out rate but did not mention the handling of missing data. [28,31] Three  
6  
7 studies did not report any information on ethical approvals or consent received from the  
8  
9 participants. [27,32,33] Protocols, trial pre-registration, and fidelity checks were not found in  
10  
11 any of the studies. Two studies reported no information about funding. [29,32]  
12  
13  
14

### 15 **Characteristics of selected studies**

16  
17  
18 Table 3 presents characteristics and outcomes of the eight included studies.  
19  
20

#### 21 **Population**

22  
23  
24  
25  
26 Post-experimental data were collected and analysed for a total of 317 participants, including  
27  
28 2% of informal ( $n = 7$ ) and 31% of formal caregivers and staff ( $n = 98$ ). In seven of the eight  
29  
30 selected studies, participants were older adults aged  $\geq 60$ , with an overall mean age of 78.8  
31  
32 years. Among these seven studies, one also included professional and informal caregivers,  
33  
34 [26] and one considered Residential Care Facility (RCF) staff as well. [28] One study only  
35  
36 involved staff in a RCF for younger adults affected by neuropsychiatric conditions. [31]  
37  
38 Three studies included older adults affected by dementia and other conditions of ageing-  
39  
40 related, cognitive impairment. [27,28,32] One study compared older adults affected by Mild  
41  
42 Cognitive Impairment (MCI) with a Cognitively Intact Healthy (CIH) group, [29] whereas  
43  
44 another one did not compare the two groups. [30] One study only selected CIH older adults,  
45  
46 [26] whereas in another one participants' condition was not reported. [33] Sixty-nine per cent  
47  
48 ( $n = 220$ ) of all participants were female. Participants' level of education was only considered  
49  
50 in three studies where over 80% of participants had at least a bachelor degree. [29,30,33]  
51  
52  
53 Similarly, in the four studies where data were collected on general Information and  
54  
55  
56  
57  
58 Communication Technology (ICT) skills, 76% ( $n = 66$ ) of 87 participants reported regular  
59  
60



1  
2  
3  
4  
5 computer use. [27,29,30,33] None of the participants had previous hands-on experience with  
6  
7 SAHRs. The largest post-experimental group consisted in Australian participants ( $n = 123$ ).  
8  
9 All the above figures includes neither data of subjects who dropped out in pre-post studies  
10  
11 [31,33] nor all data collected via observation of HRIs or interviews, as sometimes this  
12  
13 information was irretrievable or not reported. [28]  
14  
15  
16

### 17 Settings and Interventions

18  
19  
20  
21 Three trials were carried out in RCFs, [28,31,32] four in smart environments or university  
22  
23 laboratories, [26,29,30,33] and one in a combination of private apartment, RCF, and  
24  
25 laboratory. [27] None of the studies was conducted in an acute healthcare setting. Studies  
26  
27 were conducted in the following countries: four in a European context (UK, Netherlands,  
28  
29 Austria, France); [26–29] two in Australia; [31,32] one in Canada; [33] and one in the USA.  
30  
31 [30]  
32  
33  
34  
35

36 All studies included interventions where participants had hands-on experience interacting  
37  
38 with a SAHR, except for one where participants were involved in a physical robot  
39  
40 demonstration. [33] Six different types of SAHRs were used which had different  
41  
42 appearances, bodily movements' abilities, often an additional mode of interaction beyond  
43  
44 voice-based (i.e., built-in touch screen, touch sensors, tablet remote control). All were  
45  
46 customised with software packages providing a range of specific services.  
47  
48  
49  
50  
51  
52  
53  
54  
55  
56  
57  
58  
59  
60

**Table 3.** Summary table of included studies

| Authors<br>Year                 | Aim                                                                             | Participants and<br>Sampling                                                                                                                                                                                                                                                               | Methodology and Data<br>Collection                                                                                                                                    | Intervention                                                                                                                                                                                          | Findings related to enablers (E) and<br>barriers (B)                                                                                                                                                                                                                                                                                       |
|---------------------------------|---------------------------------------------------------------------------------|--------------------------------------------------------------------------------------------------------------------------------------------------------------------------------------------------------------------------------------------------------------------------------------------|-----------------------------------------------------------------------------------------------------------------------------------------------------------------------|-------------------------------------------------------------------------------------------------------------------------------------------------------------------------------------------------------|--------------------------------------------------------------------------------------------------------------------------------------------------------------------------------------------------------------------------------------------------------------------------------------------------------------------------------------------|
| 1 Bedaf et al.,<br>(2017)       | Capture the<br>experience of<br>living with a robot<br>at home                  | Aged 60+ ( $\mu = 78.9$ )<br>participants living at<br>home in the<br>Netherlands, with no<br>cognitive decline and<br>receiving home care ( $n = 10$ ), informal<br>caregivers<br>( $n = 7$ ), and<br>professional caregivers<br>( $n = 11$ ).<br>Non-probability<br>convenience sampling | Mixed-method, no<br>comparator, no baseline.<br>Questionnaire and semi-<br>structured interviews                                                                      | Care-O-bot 3. Two-<br>part-scenario,<br>highly structured<br>user test<br>administered twice<br>to each participant<br>(preceded by a<br>practise session).<br>Duration of user<br>test session: 1.5h | <b>E:</b> previous experience with technology;<br>enjoyable experience; support to prolong<br>independent living; tailored care; enhanced<br>intelligence and social skills<br><br><b>B:</b> technical problems; limited performance;<br>lack of social interaction; arbitrary<br>representations (e.g. changing colour of robot<br>torso) |
| 2 Beuscher et<br>al., (2017)    | Determine impact of<br>exposure to robots on<br>perceptions and<br>attitudes    | Age 65+ ( $\mu = 81.9$ )<br>participants with<br>corrected vision and<br>hearing that allowed<br>them to engage in<br>conversation with the<br>SAHR, and physically<br>able to participate in<br>chair exercises ( $n = 19$ ). Non-probability<br>convenience sampling                     | Pre-post intervention<br>survey. No comparator. The<br>32-item acceptance scale<br>which measured:<br>performance expectancy,<br>effort expectancy, and<br>attitudes. | NAO. Two sets of<br>HRI experiments in<br>an engineering lab<br>(USA). The first set<br>comprised of robot<br>to one older adult,<br>the second of robot<br>to two older adults                       | <b>E:</b> familiarisation; higher education; enjoyable<br>and engaging experience; easiness to<br>understand SAHR; SAHR's pleasant<br>appearance<br><br><b>B:</b> life-like appearance (1/3 liked it); not<br>feeling comfortable during HRI                                                                                               |
| 3 Caleb-Solly et<br>al., (2018) | Identify usability and<br>user experience<br>issues and how to<br>overcome them | Aged 60+ ( $\mu = 79$ )<br>group suffering from<br>some ageing-related<br>impairments but with                                                                                                                                                                                             | Mixed-method, no<br>comparator, no baseline.<br>Questionnaire, structured<br>interview, user experience                                                               | Kompaï ( <i>Molly</i> in<br>the UK, <i>Max</i> and<br><i>Charley</i> in the<br>Netherlands)                                                                                                           | <b>E:</b> trust; familiarisation; cooperative<br>interaction approach (co-learning self-training<br>system); creative and engaging ways; use of<br>Wizard; individualisation and contextualisation                                                                                                                                         |

| Authors<br>Year                 | Aim                                                                                                               | Participants and<br>Sampling                                                                       | Methodology and Data<br>Collection                                                                                                           | Intervention                                                                                                                                                                                                                                                                                              | Findings related to enablers (E) and<br>barriers (B)                                                                                                                                                                                                                                            |
|---------------------------------|-------------------------------------------------------------------------------------------------------------------|----------------------------------------------------------------------------------------------------|----------------------------------------------------------------------------------------------------------------------------------------------|-----------------------------------------------------------------------------------------------------------------------------------------------------------------------------------------------------------------------------------------------------------------------------------------------------------|-------------------------------------------------------------------------------------------------------------------------------------------------------------------------------------------------------------------------------------------------------------------------------------------------|
| 4 Hebesberger et<br>al., (2017) | Investigate<br>acceptance and<br>experience of a long-<br>term SAHR in a non-<br>controlled, real-life<br>setting | Staff members caring<br>for older adults<br>affected by dementia<br>in care-hospital<br>(Austria). | Mixed-method, no<br>comparator, no baseline.<br>Ten semi-structured<br>interviews, live<br>observations, and n = 70<br>online questionnaires | physical robotic<br>unit. Exposure:<br>orientation<br>workshops,<br>individual trials in<br>assisted living<br>studio, residential<br>care home user<br>experience trial,<br>home apartment<br>user experience<br>trial.<br>SCITOS robotic<br>platform. 15-day-<br>trial following a 5-<br>day-pilot test | <b>B:</b> technical problems<br><br><b>E:</b> Mixed results on social acceptance; seen as<br>a nice distraction, a novelty tool<br><br><b>B:</b> technical problems; robot's lack of<br>capabilities; negative views (robots v humans);<br>fear with new technology and with making<br>mistakes |

| Authors<br>Year            | Aim                                                                     | Participants and<br>Sampling                                                                                                                                                                                                                  | Methodology and Data<br>Collection                                                                                                                                                                                                   | Intervention                                                                                                                                                                                     | Findings related to enablers (E) and<br>barriers (B)                                                                                                                                                                                                                                                                                                 |
|----------------------------|-------------------------------------------------------------------------|-----------------------------------------------------------------------------------------------------------------------------------------------------------------------------------------------------------------------------------------------|--------------------------------------------------------------------------------------------------------------------------------------------------------------------------------------------------------------------------------------|--------------------------------------------------------------------------------------------------------------------------------------------------------------------------------------------------|------------------------------------------------------------------------------------------------------------------------------------------------------------------------------------------------------------------------------------------------------------------------------------------------------------------------------------------------------|
| 5 Khosla et al.,<br>(2017) | Study engagement and acceptability of SAHR amongst people with dementia | Aged 65-90 ( $\mu = 77.5$ ) home care residents, with dementia and other conditions, living in residential care facilities in Australia ( $n = 115$ ). Total reactions coded and analysed: $n = 8,304$ . Non-probability convenience sampling | Mixed-method, longitudinal experience trial. Video coding following engagement measures (emotional, visual, behavioural, verbal) during trial. Post-trial survey (acceptability based on Technology Acceptance Model, TAM)           | Matilda robotic unit. Designed activities in Matilda relevant to social context in RCFs in Australia. Repeated three-stage, 4- to 6-hours long, field trials in four residential care facilities | <b>E:</b> services' personalisation (e.g. songs and lyrics, integrated with human-like emotive expressions) accounting for users' disabilities; human-like features; personalisation underpinned in concept of personhood<br><br><b>B:</b> technology barrier can be broken by accounting for the context of service, robot interface, and users.    |
| 6 Loi et al.,<br>(2017)    | Investigate SAHR acceptance and utilisation                             | Staff in a residential care facility for younger adults in Australia. Pre-questionnaire ( $n = 24$ ) Post-questionnaire ( $n = 8$ ). Non-probability convenience sampling                                                                     | Pre-post intervention survey. No comparator. TAM informed questionnaire with 6 statements pertaining to the staff themselves and 11 statements about the residents. Two post-questionnaire questions about the benefits and barriers | Betty. Two 1-hour long training /introductory sessions over 2 weeks. In addition, Betty spent 12 weeks at the residential care facility                                                          | <b>E:</b> individualisation; music; the enjoyment interacting with the robot, being comfortable with the robot, perceived usefulness that the robot will improve their daily life and well-being; Perceived beneficial for the patients<br><br><b>B:</b> excessive workload; negative assumptions on older residents' ICT skills; technical problems |
| 7 Louie et al.,<br>(2014)  | Explore acceptance and attitude toward human-like expressive SAHR       | $N = 54$ older adults from a senior association (in Canada) ( $\mu = 76.5$ ). Non-probability convenience sampling                                                                                                                            | Post-experimental survey. No comparator. TAM informed questionnaire of 18 items measuring 7 constructs ( $N = 46$ completed the                                                                                                      | Brian 2.1. One 1.5 hour-long live demonstration following person-centred behaviours guidelines                                                                                                   | <b>E:</b> human-like communication is preferred over human-like appearance; gender (the male robot is more appreciate by female user).<br><br><b>B:</b> Feeling anxious with new technology<br>* No relationship between previous experience and ease to use                                                                                         |

| Authors<br>Year        | Aim                            | Participants and<br>Sampling                                                                                                          | Methodology and Data<br>Collection                                                                                                                                                                                                                                                                     | Intervention                                                                                                                              | Findings related to enablers (E) and<br>barriers (B)                                                                                                                                                                                                                                                                                                                                                                                                                                                                                       |
|------------------------|--------------------------------|---------------------------------------------------------------------------------------------------------------------------------------|--------------------------------------------------------------------------------------------------------------------------------------------------------------------------------------------------------------------------------------------------------------------------------------------------------|-------------------------------------------------------------------------------------------------------------------------------------------|--------------------------------------------------------------------------------------------------------------------------------------------------------------------------------------------------------------------------------------------------------------------------------------------------------------------------------------------------------------------------------------------------------------------------------------------------------------------------------------------------------------------------------------------|
| 8 Wu et al.,<br>(2014) | Investigate SAHR<br>acceptance | Older adults ( $\mu = 79.3$ )<br>with MCI and no<br>impairment ( $n = 11$ ) in<br>France. Non-<br>probability<br>convenience sampling | questionnaire, of which $n =$<br>37 female)<br>Mixed-method. Healthy<br>group compared with group<br>with MCI. No baseline, no<br>treatment-as-usual<br>comparator. Usability-<br>performance measures,<br>TAM informed acceptance<br>questionnaire, semi-<br>structured interview, and<br>focus group | Kompaï.<br>Participants<br>interacted with<br>SAHR in the<br>Living Lab once a<br>week for 4 weeks.<br>Duration of<br>interaction: 1 hour | <b>E:</b> usability and amusement; encouragement to<br>use from formal and informal carers<br>professionals; sense of discovery and being up-<br>to-date with technology; familiarisation<br><b>B:</b> uneasiness with technology; feeling of<br>stigmatization (i.e. dependency and decline);<br>ethical/societal issues associated with robot use<br>(i.e., fear of societal dehumanisation /changing<br>human nature and what it means to care).<br>* MCI may encounter more difficulties; HIC<br>tended to show less positive attitude |

1  
2  
3  
4  
5 In most studies, a pilot field test was conducted to establish familiarization. Pilot testing was  
6  
7 deemed necessary particularly in those experiments where participants had to interact with  
8  
9 the SAHR in highly structured scenarios performing specific tasks, sometimes following  
10  
11 instructions. [26,27,29,30] This type of HRI lasted between 45 minutes [26] and up to 6  
12  
13 hours. [32] Two studies adopted a design whereby the HRI was not structured, and RCFs  
14  
15 residents and members of staff freely chose to interact with the SAHR. [28,31]  
16  
17

18  
19  
20 The HRIs in the eight exposures involved the following services and activities: playing  
21  
22 cognitive games such as Bingo, Hoy, and general knowledge games, including an orientation  
23  
24 game with the support of pictures, '21 questions', and 'Simon says' game; [27,29–33]  
25  
26 listening to music, singing, and dancing (including joint chair exercise), storytelling,  
27  
28 relaxation; [30–32,36] carry and delivery tasks; [26,27] calendar and reminders, such as to  
29  
30 drink water, to do exercise, to take medication; [26,27,29] weather information; [31]  
31  
32 restaurant finding; [33] and reception and greeting of individuals. [28]  
33  
34  
35  
36

### 37 **Narrative synthesis**

38  
39  
40 Findings in terms of enablers and barriers are presented below and summarised in Figure 2.  
41  
42  
43

#### 44 **Enablers**

45  
46  
47 *Enjoyment.* An enjoyable experience was found to be a crucial factor conducive to SAHRs'  
48  
49 use and implementation. In all trials (87%) except one, [33] participants highly valued  
50  
51 enjoyment and engagement when interacting with the SAHR, in particular listening to music  
52  
53 and playing games.  
54  
55

56  
57  
58 *Usability.* Intuitiveness and easiness of use proved to be essential enablers towards the  
59  
60

1  
2  
3  
4  
5 implementation of SAHRs in five studies (62%). [26,27,29,30,32] Usability is to be broadly  
6  
7 intended in terms of lack of technical issues, intuitive interface, and design factoring  
8  
9 participants' disabilities.  
10

11  
12  
13 *Personalisation.* Engagement and enjoyment were found to be interlinked with the  
14  
15 personalisation of services, hence ultimately with overall use and implementation.  
16

17 Personalisation should account for: adaptation to users' taste and preferences; [32] user's care  
18  
19 needs, [26] context, routine; [27] and users' impairments. [29,32]  
20  
21  
22

23 *Familiarisation.* In as much as the robot should offer individualised services, users also  
24  
25 should learn and adapt to the robot's status and intentions. [27] While the model of human-  
26  
27 robot co-dependent relationship is prominent in one study only, [27] other studies found  
28  
29 familiarisation to be an important factor positively affecting implementation. [29,30,32]  
30  
31  
32

### 33 Barriers

34  
35  
36  
37 *Technical problems.* Half of the studies [26–28,31] explicitly stated that technical issues with  
38  
39 the robot itself constituted a barrier to SAHRs' implementation in health and social care.  
40  
41  
42

43 *SAHRs' limited capabilities.* The limited performance of the robot was found as a crucial  
44  
45 barrier to use. This impediment was explicitly reported in two studies, [26,28] while more  
46  
47 implicitly in other two, where the robot's restricted skills were described in terms of limited  
48  
49 personalisation of services [32] and co-learning/self-training abilities. [27]  
50  
51  
52

53 *Negative preconceptions.* In a study, health professionals' assumptions on older adults'  
54  
55 capacity to interact with SAHR were included among the barriers to implementation. [31]  
56  
57

58 Two other studies elaborated on the negative views towards robots in terms of  
59  
60

1  
2  
3  
4  
5 dehumanisation of care and society, [28,29] and of stigmatising effects associated to being a  
6  
7 dependent individual in decline. [29] In three studies, negative preconceptions came from  
8  
9 formal and informal carers rather than from older adults themselves. [26,28,31]  
10  
11

### 12 13 Mixed views 14 15

16 *Human-like attributes.* One study showed that human-like appearance was appreciated by  
17  
18 one-third of the participants. [30] Another study reported that human-like communication  
19  
20 was preferred over human-like appearance. [33] In the same study, 80% of the subjects  
21  
22 completing the trial were older women who declared to prefer a male looking SAHR with  
23  
24 male voice. A third study concluded that SAHRs based on human-centred system with  
25  
26 human-like characteristic are likely to enable acceptance and use. [32] However, in the same  
27  
28 study, it was also reported that the fact that the SAHR was not judgemental facilitated  
29  
30 interaction. [32] Finally, in a fourth study, the lack of more complex social interaction was  
31  
32 identified as a barrier to implementation. [26]  
33  
34  
35  
36  
37

38 *Previous experience with ICT.* While one study found that previous experience with  
39  
40 technology positively correlated with use, [26] another trial found that there was no  
41  
42 relationship between previous experience and ease to use. [33]  
43  
44  
45

46 *The role of formal and informal caregivers.* As mentioned above, the negative attitudes of  
47  
48 formal and informal carers has been shown to constitute an impediment to SAHRs  
49  
50 implementation. [26,28,31] Conversely, one study highlighted the enabling effect of the  
51  
52 encouragement for SAHRs' use on behalf of relatives and professionals. [29]  
53  
54  
55  
56  
57  
58  
59  
60



## DISCUSSION

### Summary of evidence

Our review focused on the identification of factors that could facilitate or hinder the implementation of SAHRs in health and social care. We focused on actual interactions of older adults with social robots in different settings in order to better understand what the current issues are in regard to implementation. Enablers, such as enjoyment and personalisation, were mainly related to the use of robots at an individual level. The element of enjoyment in the HRI was also found to be crucial among hospital patients [37] opening the doors for considering social robots as an intervention to combat social isolation in hospital settings.

Barriers were related to technical problems and to current limited capabilities of the robots. Technology malfunction and/or technology limitations were reported as areas of concern, similar to a recent survey of Korean nurses. [38] Surprisingly for the heavily regulated field of healthcare, the issues of safety, ethics, and safeguarding were not identified in this review as significant implementation-related factors even though nurses and healthcare workers have been raising these issues. [11] Safety and ethical issues were reported as major concerns in previous systematic reviews, [10,13] and it is imperative that future research investigates these issues. In agreement with Vandemeulebroucke *et al*, [39] we believe that all stakeholders should have a voice in the current debate but also in the design of future technologies, their application, and implementation. We also agree with Chou *et al* [40] that future planning should view all these factors under a broader policy framework and policy makers should work collaborative to ensure the ethical and safe implementation of robots.

1  
2  
3  
4  
5 Robot's appearance [26,30,32,33] and views of carers and relatives provided mixed results.  
6  
7 [26,28,29,31] In regard to the appearance, Mori's theory of the 'uncanny valley' is  
8  
9 illuminating. [41] Between the animated and the perfectly realistic, human-like appearance of  
10  
11 robots, there is an area where depictions can create uncomfortable feelings in humans.  
12  
13 Therefore, life-like attributes of the robots, such as voice, facial expressions, gestures, bodily  
14  
15 appearance, and gender, have an impact on how the user experiences the robot and on the  
16  
17 HRI. The indeterminacy of robots' appearance is reflected onto the dramatic variations of  
18  
19 SAHRs found in the literature. We also know that one's cultural background influences views  
20  
21 and perceptions of the robot's aesthetics. [9] Culturally specific research on the relationship  
22  
23 between appearance, acceptance, and implementation is therefore promising in HRI studies.  
24  
25  
26  
27  
28  
29 According to our protocol, we searched for factors affecting the implementation of SAHRs  
30  
31 by key stakeholders, such as health professionals. The role of formal and informal caregivers  
32  
33 has been found as crucial. [42] However, the information we could yield was limited and  
34  
35 mixed, and this is an area that urgently requires further research, involving longitudinal  
36  
37 studies and larger samples. Abbott *et al* [6] on their review of the use of social robotic pets  
38  
39 (animal-like social robots) found similar mixed feelings from the different stakeholders. The  
40  
41 fact that people have very strong feelings on the opposite sides of the spectrum, either very  
42  
43 positive or very negative, is significant to implementation and requires a careful  
44  
45 investigation.  
46  
47  
48  
49  
50

51 The completeness and overall applicability of the evidence is limited, mostly because it  
52  
53 provides only insights into individual-level factors related to the acceptance of technology.  
54  
55 This can be partly attributed to the main theoretical framework used in the studies. The  
56  
57 Technology Acceptance Model (TAM) proposes in fact an explanation for a person's actual  
58  
59 and intentional use of a technology through an exploration of their attitudes towards it. [34]  
60

1  
2  
3  
4  
5 The lack of evidence related to other main key stakeholders, such as formal and informal  
6 carers, along with factors related to the environment, policy, society and organisation is a  
7 major limitation.  
8  
9

10  
11  
12 Exploring attitudes of other populations, such as formal caregivers, as well as the use of other  
13 theoretical models is considered critical. The field would benefit, for example, from the use  
14 of the Diffusion of Innovations Theory (DIT), [43] when considering research questions  
15 related to the use of SAHRs in healthcare; but also from theories that explore the co-existence  
16 of technology and caring, such the Theory of Technological Competency as Caring in  
17 Nursing. [44] King and Barry [45] recently introduced a theoretical model that highlights  
18 caring theories when considered the design of healthcare robots. Understanding how nursing  
19 care will change, or what will be the best interface of nurses with SAHRs is critical. In  
20 addition, how compassionate care will be understood, expressed, and studied is also essential.  
21 The --- model that integrates compassion into culturally competent care would be useful in  
22 exploring the interrelations between service users, nurses, health professionals, family  
23 members, and SAHRs. [46]  
24  
25  
26  
27  
28  
29  
30  
31  
32  
33  
34  
35  
36  
37  
38  
39  
40

## 41 **Limitations**

42  
43  
44  
45 As per protocol, our intention was to explore enablers and barriers to the implementation of  
46 SAHRs in both health and social care but, in fact, most of the activities assessed were more  
47 relevant to social care. Even medication reminders, which are obviously health-related, form  
48 an important part of social care. There is therefore little to inform health practitioners as to  
49 the possible application of SAHRs in health settings. Furthermore, very few studies (n=8)  
50 have deployed and implemented SAHRs in health and social care settings, hence the  
51 available information is scant. In addition, as shown in Table 2, quality of the studies is  
52  
53  
54  
55  
56  
57  
58  
59  
60

1  
2  
3  
4  
5 problematic.

6  
7  
8 The heterogeneity of study designs led to the identification of factors in single studies. For  
9 example, only one study reported on the level of education as enabling factor of SAHRs'  
10 acceptance. [30] Another study found that fear of making mistakes with technology was a  
11 barrier to implementation. [28] However, in another study, uneasiness with technology  
12 seemed to be counterbalanced by a sense of discovery and being up-to-date with ICT. [29]

13  
14  
15 The evidence is too scant to generalise these initial findings, and further research is needed to  
16 assess the impact of these and other factors onto SAHRs' acceptance and implementation in  
17 health and social care.  
18  
19  
20  
21  
22  
23  
24  
25  
26  
27  
28  
29  
30

## 31 **CONCLUSION AND PERSPECTIVES**

32  
33  
34  
35 The use of SAHRs is promising in responding to some of the care challenges of an ageing  
36 population. This literature review summarised the enablers and barriers to the implementation  
37 of SAHRs in health and social care. Evidence suggests that enjoyment and personalisation are  
38 the chief enablers to the implementation of robots, whilst the two most important barriers had  
39 to do with technical problems and the limited capabilities of the robots. However, there are  
40 limitations to the evidence as most studies were at a high risk of bias involving very small  
41 samples. Gaps in the evidence include factors related to environment, organisation, socio-  
42 cultural milieu, policy and legal framework. Furthermore, the research focus has currently  
43 been placed on understanding the acceptance of robots by adult users, but there is no  
44 discussion of the needs of the healthcare workforce on a professional level, and how these  
45 needs are being met by educational institutions, professional organisations, and employers.  
46  
47  
48  
49  
50  
51  
52  
53  
54  
55  
56  
57  
58  
59  
60

## **Acknowledgments**

We would like to thank Dr Zbys Fedorowicz for his contributions and helpful advice.

## **Author statement**

IP and CK conceived and designed the study. CK and SA acquired, screened and conducted the initial data extraction. IP acted as a referee in the screening, analysis and interpretation of the data. RL and CK drafted the manuscript and IP provided the critical review of it. All authors approved the version to be published and agreed to be accountable for all the aspects of this work.

## **Funding**

This work was supported by CARESSES (Horizon 2020, Grant Agreement ID: 737858) and additional funds from the Middlesex University, School of Health & Education.

## **Competing interests' statement**

None. The authors whose names are listed above certify that they have NO affiliations with or involvement in any organization or entity with any financial interest or non-financial interest in the subject matter or materials discussed in this manuscript.

## **Data sharing statement**

Data are available upon reasonable request. Completed data extraction tables and Public Health Critical Appraisal Checklist tables for all studies are available from the corresponding author of this review and their use is permitted once their use is clarified. No additional information is available.

## Patient and public involvement

It was not appropriate or possible to involve patients or the public in this work.

Figure 1. PRISMA flow chart

Figure 2. Summary of results

## REFERENCES

- 1 World Health Organization. Ageing and health. 2018. <https://www.who.int/news-room/fact-sheets/detail/ageing-and-health> (accessed 2 Apr 2019).
- 2 UK Government. Policy Paper. The Grand Challenges. 2018. <https://www.gov.uk/government/publications/industrial-strategy-the-grand-challenges/industrial-strategy-the-grand-challenges> (accessed 8 Apr 2019).
- 3 Khosravi P, Ghapanchi AH. Investigating the effectiveness of technologies applied to assist seniors: A systematic literature review. *International Journal of Medical Informatics* 2016;**85**:17–26. doi:10.1016/j.ijmedinf.2015.05.014
- 4 Abdi J, Al-Hindawi A, Ng T, *et al.* Scoping review on the use of socially assistive robot technology in elderly care. *BMJ Open* 2018;**8**:e018815. doi:10.1136/bmjopen-2017-018815
- 5 Pu L, Moyle W, Jones C, *et al.* The Effectiveness of Social Robots for Older Adults: A Systematic Review and Meta-Analysis of Randomized Controlled Studies. *Gerontologist* 2019;**59**:e37–51. doi:10.1093/geront/gny046
- 6 Abbott R, Orr N, McGill P, *et al.* How do “robopets” impact the health and well-being of residents in care homes? A systematic review of qualitative and quantitative evidence. *Int J Older People Nurs* 2019;:e12239. doi:10.1111/opn.12239
- 7 Aarskog NK, Hunskår I, Bruvik F. Animal-Assisted Interventions With Dogs and Robotic Animals for Residents With Dementia in Nursing Homes: A Systematic Review. *Physical & Occupational Therapy In Geriatrics* 2019;**37**:77–93. doi:10.1080/02703181.2019.1613466
- 8 Broadbent E, Stafford R, MacDonald B. Acceptance of Healthcare Robots for the Older Population: Review and Future Directions. *Int J of Soc Robotics* 2009;**1**:319. doi:10.1007/s12369-009-0030-6
- 9 ----

- 1  
2  
3  
4  
5 10 Vandemeulebroucke T, de Casterlé BD, Gastmans C. How do older adults experience  
6 and perceive socially assistive robots in aged care: a systematic review of qualitative  
7 evidence. *Aging Ment Health* 2018;**22**:149–67. doi:10.1080/13607863.2017.1286455  
8  
9  
10 11 ----  
11  
12 12 Cresswell K, Cunningham-Burley S, Sheikh A. Health Care Robotics: Qualitative  
13 Exploration of Key Challenges and Future Directions. *Journal of Medical Internet*  
14 *Research* 2018;**20**:e10410. doi:10.2196/10410  
15  
16 13 Frennert S, Östlund B. Review: Seven Matters of Concern of Social Robots and Older  
17 People. *Int J of Soc Robotics* 2014;**6**:299–310. doi:10.1007/s12369-013-0225-8  
18  
19 14 Elliott L. Workers at risk as robots set to replace 66m jobs, warns OECD. The Guardian.  
20 2018.[https://www.theguardian.com/business/2018/apr/03/robots-could-take-over-more-](https://www.theguardian.com/business/2018/apr/03/robots-could-take-over-more-than-65m-jobs-warns-oecd-report)  
21 [than-65m-jobs-warns-oecd-report](https://www.theguardian.com/business/2018/apr/03/robots-could-take-over-more-than-65m-jobs-warns-oecd-report) (accessed 2 Apr 2019).  
22  
23 15 Chui M, Manyika J, Miremadi M. Where machines could replace humans--and where  
24 they can't (yet) |. McKinsey Digital 2016. [https://www.mckinsey.com/business-](https://www.mckinsey.com/business-functions/digital-mckinsey/our-insights/where-machines-could-replace-humans-and-where-they-cant-yet)  
25 [functions/digital-mckinsey/our-insights/where-machines-could-replace-humans-and-](https://www.mckinsey.com/business-functions/digital-mckinsey/our-insights/where-machines-could-replace-humans-and-where-they-cant-yet)  
26 [where-they-cant-yet](https://www.mckinsey.com/business-functions/digital-mckinsey/our-insights/where-machines-could-replace-humans-and-where-they-cant-yet) (accessed 2 Apr 2019).  
27  
28  
29 16 ----  
30  
31 17 Blair L. Mind healing: why are we so afraid of robots? The Telegraph.  
32 2017.<https://www.telegraph.co.uk/health-fitness/mind/mind-healing-afraid-robots/>  
33 (accessed 2 Apr 2019).  
34  
35 18 Kellermeyer L, Harnke B, Knight S. Covidence and Rayyan. *J Med Libr Assoc*  
36 2018;**106**:580–3. doi:10.5195/jmla.2018.513  
37  
38 19 Ouzzani M, Hammady H, Fedorowicz Z, *et al*. Rayyan—a web and mobile app for  
39 systematic reviews. *Syst Rev* 2016;**5**. doi:10.1186/s13643-016-0384-4  
40  
41 20 Hall AK, Backonja U, Painter I, *et al*. Acceptance and perceived usefulness of robots to  
42 assist with activities of daily living and healthcare tasks. *Assist Technol* 2017;:1–8.  
43 doi:10.1080/10400435.2017.1396565  
44  
45 21 Wu Y-H, Cristancho-Lacroix V, Fassert C, *et al*. The Attitudes and Perceptions of Older  
46 Adults With Mild Cognitive Impairment Toward an Assistive Robot. *J Appl Gerontol*  
47 2016;**35**:3–17. doi:10.1177/0733464813515092  
48  
49 22 Zsiga K, Edelmayer G, Rumeau P, *et al*. Home care robot for socially supporting the  
50 elderly: focus group studies in three European countries to screen user attitudes and  
51 requirements. *Int J Rehabil Res* 2013;**36**:375–8. doi:10.1097/MRR.0b013e3283643d26  
52  
53  
54  
55  
56  
57  
58  
59  
60

- 23 Moher D, Liberati A, Tetzlaff J, *et al.* Preferred Reporting Items for Systematic Reviews and Meta-Analyses: The PRISMA Statement. *PLOS Medicine* 2009;**6**:e1000097. doi:10.1371/journal.pmed.1000097
- 24 Cochran BN, Stewart AJ, Ginzler JA, *et al.* Challenges Faced by Homeless Sexual Minorities: Comparison of Gay, Lesbian, Bisexual, and Transgender Homeless Adolescents With Their Heterosexual Counterparts. *American Journal of Public Health* 2002;**92**:773.
- 25 Heller RF, Verma A, Gemmell I, *et al.* Critical appraisal for public health: A new checklist. *Public Health* 2008;**122**:92–8. doi:10.1016/j.puhe.2007.04.012
- 26 Bedaf S, Marti P, Amirabdollahian F, *et al.* A multi-perspective evaluation of a service robot for seniors: the voice of different stakeholders. *Disabil Rehabil Assist Technol* 2017;**13**:592–9. doi:10.1080/17483107.2017.1358300
- 27 Caleb-Solly P, Dogramadzi S, Huijnen CAGJ, *et al.* Exploiting ability for human adaptation to facilitate improved human-robot interaction and acceptance. *The Information Society* 2018;**34**:153–65. doi:10.1080/01972243.2018.1444255
- 28 Hebesberger D, Koertner T, Gisinger C, *et al.* A Long-Term Autonomous Robot at a Care Hospital: A Mixed Methods Study on Social Acceptance and Experiences of Staff and Older Adults. *Int J of Soc Robotics* 2017;**9**:417–29. doi:10.1007/s12369-016-0391-6
- 29 Wu Y-H, Wrobel J, Cornuet M, *et al.* Acceptance of an assistive robot in older adults: a mixed-method study of human-robot interaction over a 1-month period in the Living Lab setting. *Clin Interv Aging* 2014;**9**:801–11. doi:10.2147/CIA.S56435
- 30 Beuscher LM, Fan J, Sarkar N, *et al.* Socially Assistive Robots: Measuring Older Adults' Perceptions. *J Gerontol Nurs* 2017;**43**:35–43. doi:10.3928/00989134-20170707-04
- 31 Loi SM, Bennett A, Pearce M, *et al.* A pilot study exploring staff acceptability of a socially assistive robot in a residential care facility that accommodates people under 65 years old. *International Psychogeriatrics* 2017;**30**:1075–80. doi:10.1017/S1041610217002617
- 32 Khosla R, Nguyen K, Chu M-T. Human Robot Engagement and Acceptability in Residential Aged Care. *International Journal of Human-Computer Interaction* 2017;**33**:510–22. doi:10.1080/10447318.2016.1275435
- 33 Louie W-YG, McColl D, Nejat G. Acceptance and Attitudes Toward a Human-like Socially Assistive Robot by Older Adults. *Assistive Technology* 2014;**26**:140–50. doi:10.1080/10400435.2013.869703
- 34 Davis FD, Bagozzi RP, Warshaw PR. User Acceptance of Computer Technology: A Comparison of Two Theoretical Models. *Management Science* 1989;**35**:982–1003. doi:10.1287/mnsc.35.8.982



- 1  
2  
3  
4  
5 35 Heerink M, Kröse B, Evers V, *et al.* Assessing Acceptance of Assistive Social Agent  
6 Technology by Older Adults: the Almere Model. *Int J of Soc Robotics* 2010;**2**:361–75.  
7 doi:10.1007/s12369-010-0068-5  
8  
9  
10 36 Fan J, Bian D, Zheng Z, *et al.* A Robotic Coach Architecture for Elder Care (ROCARE)  
11 Based on Multi-User Engagement Models. *IEEE Transactions on Neural Systems and*  
12 *Rehabilitation Engineering* 2017;**25**:1153–63. doi:10.1109/TNSRE.2016.2608791  
13  
14 37 Sarabia M, Young N, Canavan K, *et al.* Assistive Robotic Technology to Combat Social  
15 Isolation in Acute Hospital Settings. *International Journal of Social Robotics*  
16 2018;**10**:607–20. doi:10.1007/s12369-017-0421-z  
17  
18 38 Lee J-Y, Song YA, Jung JY, *et al.* Nurses’ needs for care robots in integrated nursing  
19 care services. *J Adv Nurs* Published Online First: 13 May 2018. doi:10.1111/jan.13711  
20  
21  
22 39 Vandemeulebroucke T, Dierckx de Casterlé B, Gastmans C. The use of care robots in  
23 aged care: A systematic review of argument-based ethics literature. *Arch Gerontol*  
24 *Geriatr* 2018;**74**:15–25. doi:10.1016/j.archger.2017.08.014  
25  
26  
27 40 Chou Y, Wang SB, Lin Y. Long-term care and technological innovation: the application  
28 and policy development of care robots in Taiwan. *Journal of Asian Public Policy*  
29 2019;**12**:104–23. doi:10.1080/17516234.2018.1492315  
30  
31  
32 41 Mori M. The Uncanny Valley. *IEEE Robotics Automation Magazine* 2012;**19**:98–100.  
33 doi:10.1109/MRA.2012.2192811  
34  
35 42 Barrett E, Murphy K, Mannion A, *et al.* Can Social Robots Help to Reduce Loneliness  
36 and Social Isolation in People with Dementia? A Delphi Survey. *Age Ageing*  
37 2017;**46**:iii13–59. doi:10.1093/ageing/afx144.114  
38  
39  
40 43 Rogers EM. *Diffusion of innovations*. 4th ed. New York: : Free Press 1995.  
41  
42 44 Locsin RC. The Co-Existence of Technology and Caring in the Theory of Technological  
43 Competency as Caring in Nursing. *The Journal of Medical Investigation* 2017;**64**:160–4.  
44 doi:10.2152/jmi.64.160  
45  
46 45 M. King B, D. Barry C. “Caring Between” the Nurse, the One Nursed, and the Healthcare  
47 Robot: An Interpreted Nursing Situation Using the Barry, Gordon, King Framework.  
48 *International Journal for Human Caring* 2019;**23**:168–77. doi:10.20467/1091-  
49 5710.23.2.168  
50  
51

52 46 ----  
53  
54  
55  
56  
57  
58  
59  
60

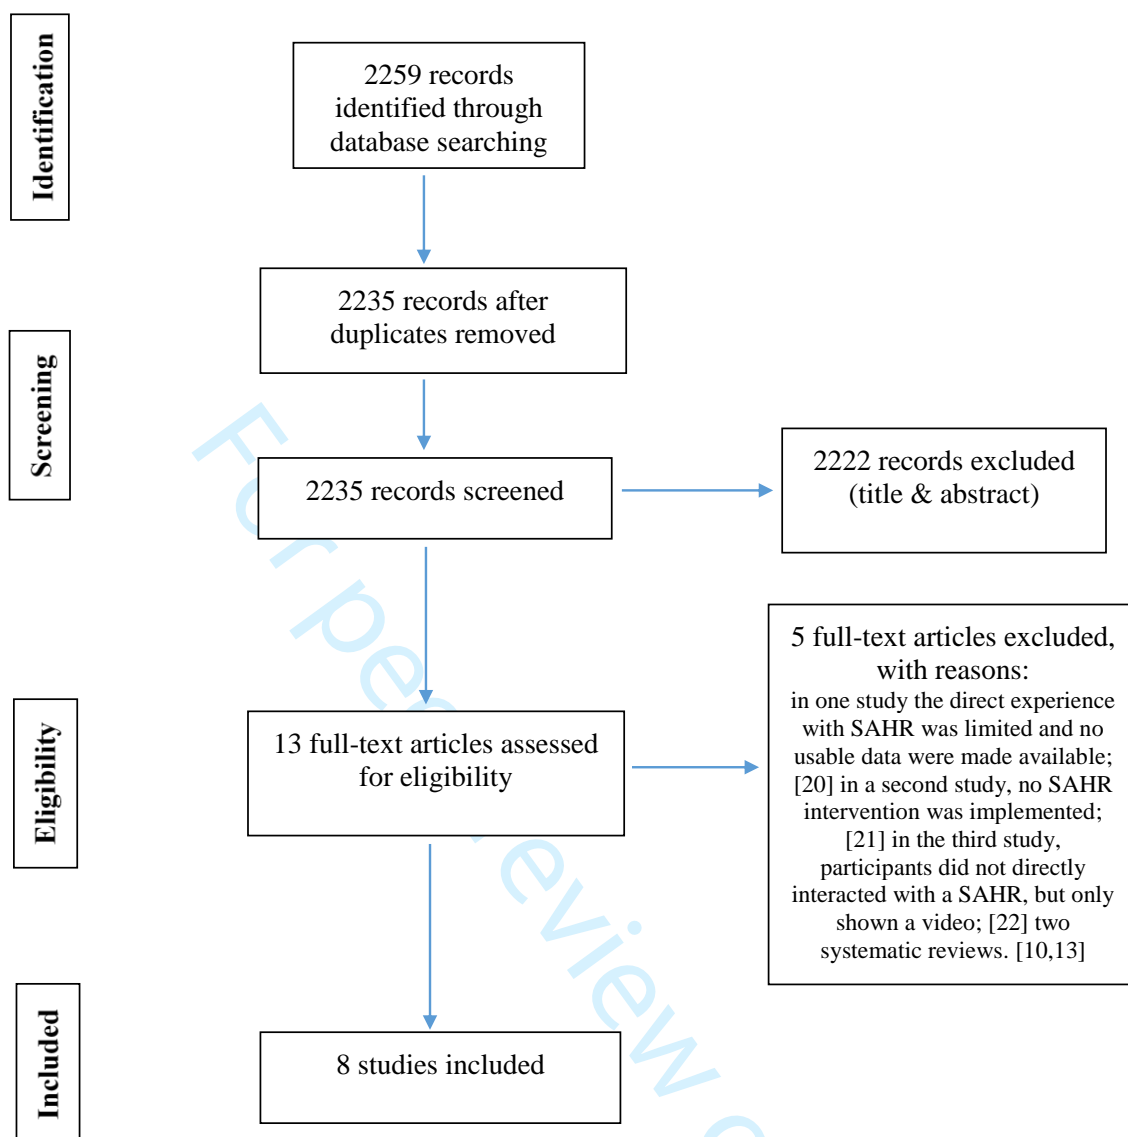

Figure 1. PRISMA Flow Chart

1  
2  
3  
4  
5  
6  
7  
8  
9  
10  
11  
12  
13  
14  
15  
16  
17  
18  
19  
20  
21  
22  
23  
24  
25  
26  
27  
28  
29  
30  
31  
32  
33  
34  
35  
36  
37  
38  
39  
40  
41  
42  
43  
44  
45  
46  
47  
48  
49  
50  
51  
52  
53  
54  
55  
56  
57  
58  
59  
60

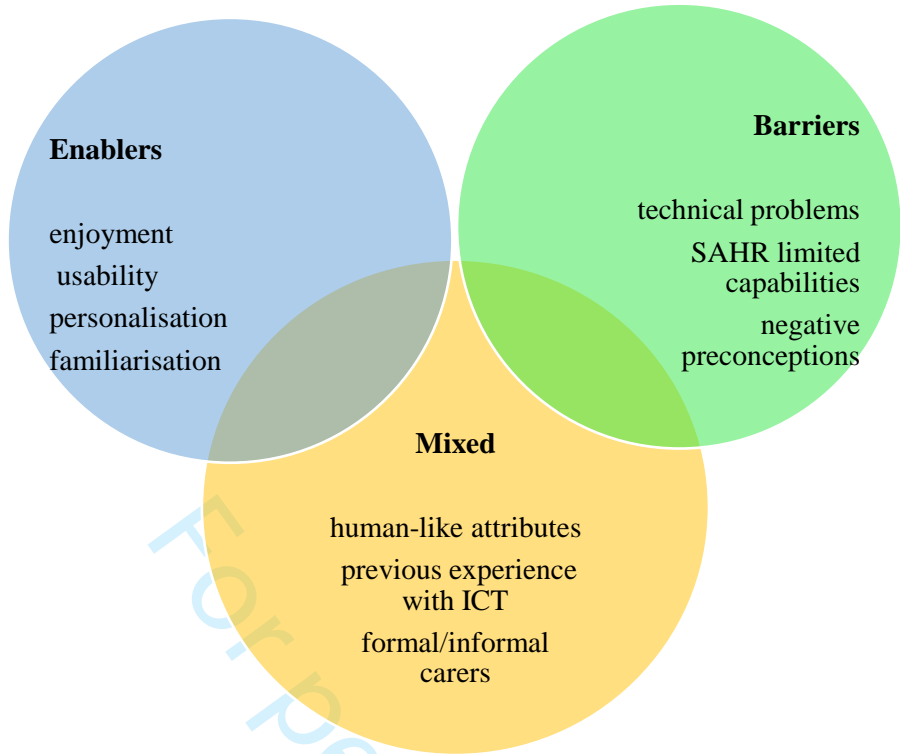

Figure 2. Summary of Results

**DATA EXTRACTION TABLE**

**Name of study:** \_\_\_\_\_ **Assessor** \_\_\_\_\_

|                                                   |
|---------------------------------------------------|
| <b>Interventions: dose/frequency/duration etc</b> |
| <b><u>Intervention</u></b>                        |
| <b><u>Comparator</u></b>                          |

|                                                                                                                                                                                                                                                                                                                                                                                                                                                                                                                                                                                                                                                                                                                                                                                                                                                                                                                                                                                                                |
|----------------------------------------------------------------------------------------------------------------------------------------------------------------------------------------------------------------------------------------------------------------------------------------------------------------------------------------------------------------------------------------------------------------------------------------------------------------------------------------------------------------------------------------------------------------------------------------------------------------------------------------------------------------------------------------------------------------------------------------------------------------------------------------------------------------------------------------------------------------------------------------------------------------------------------------------------------------------------------------------------------------|
| <p><b>Outcome measures according to <u>us, of our review</u> (not from authors of study)</b></p> <p><b>1. Primary outcomes</b><br/>                 The identification of a <u>comprehensive listing of enablers and barriers</u> to the implementation of Socially Assistive Humanoid Robots (SAHR) in health and social care.<br/>                 Barriers: those impeding the implementation of SAHR which may include factors, issues or themes at local, system or policy level.<br/>                 Enablers: <u>mechanisms and initiatives whereby patients’ providers or policy makers contribute to facilitating the positive uptake and implementation</u> of SAHR.</p> <p><b>2. Secondary outcomes</b><br/>                 The insights from these enablers and barriers and their impact.<br/>                 Gaps and future developments to inform further research.</p> <p><b>Principal outcome measures: (from the authors in the study)</b></p> <p>a) ...</p> <p>b) ...</p> <p>c) ...</p> |
|----------------------------------------------------------------------------------------------------------------------------------------------------------------------------------------------------------------------------------------------------------------------------------------------------------------------------------------------------------------------------------------------------------------------------------------------------------------------------------------------------------------------------------------------------------------------------------------------------------------------------------------------------------------------------------------------------------------------------------------------------------------------------------------------------------------------------------------------------------------------------------------------------------------------------------------------------------------------------------------------------------------|

|                                                         |     |      |                |
|---------------------------------------------------------|-----|------|----------------|
| <b>What were the results of these outcome measures?</b> |     |      |                |
| <b>Measure a)</b>                                       |     |      |                |
|                                                         | Pre | Post |                |
| 1.                                                      |     |      | Fisher’s exact |
| 2.                                                      |     |      |                |
| <b>Measure b) and c)</b>                                |     |      |                |
| <b>Barriers</b>                                         |     |      |                |
| <b>Enablers</b>                                         |     |      |                |
| <b>Gaps and future developments</b>                     |     |      |                |
|                                                         |     |      |                |
|                                                         |     |      |                |

|                                      |        |
|--------------------------------------|--------|
| <b><u>SUMMARY</u></b>                |        |
| Identified Enablers from this study: | 1. ... |
|                                      | 2. ... |
| Identified Barriers:                 | 1. ... |
|                                      | 2. ... |
| <b>Conclusive remarks</b>            |        |
| <b>Useful References</b>             |        |
|                                      |        |

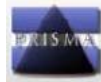

# PRISMA 2009 Checklist

| Section/topic                      | #  | Checklist item                                                                                                                                                                                                                                                                                              | Reported on page # |
|------------------------------------|----|-------------------------------------------------------------------------------------------------------------------------------------------------------------------------------------------------------------------------------------------------------------------------------------------------------------|--------------------|
| <b>TITLE</b>                       |    |                                                                                                                                                                                                                                                                                                             |                    |
| Title                              | 1  | Identify the report as a systematic review, meta-analysis, or both.                                                                                                                                                                                                                                         | 1                  |
| <b>ABSTRACT</b>                    |    |                                                                                                                                                                                                                                                                                                             |                    |
| Structured summary                 | 2  | Provide a structured summary including, as applicable: background; objectives; data sources; study eligibility criteria, participants, and interventions; study appraisal and synthesis methods; results; limitations; conclusions and implications of key findings; systematic review registration number. | 2                  |
| <b>INTRODUCTION</b>                |    |                                                                                                                                                                                                                                                                                                             |                    |
| Rationale                          | 3  | Describe the rationale for the review in the context of what is already known.                                                                                                                                                                                                                              | 4-5                |
| Objectives                         | 4  | Provide an explicit statement of questions being addressed with reference to participants, interventions, comparisons, outcomes, and study design (PICOS).                                                                                                                                                  | 6                  |
| <b>METHODS</b>                     |    |                                                                                                                                                                                                                                                                                                             |                    |
| Protocol and registration          | 5  | Indicate if a review protocol exists, if and where it can be accessed (e.g., Web address), and, if available, provide registration information including registration number.                                                                                                                               |                    |
| Eligibility criteria               | 6  | Specify study characteristics (e.g., PICOS, length of follow-up) and report characteristics (e.g., years considered, language, publication status) used as criteria for eligibility, giving rationale.                                                                                                      | 8                  |
| Information sources                | 7  | Describe all information sources (e.g., databases with dates of coverage, contact with study authors to identify additional studies) in the search and date last searched.                                                                                                                                  | 6-7                |
| Search                             | 8  | Present full electronic search strategy for at least one database, including any limits used, such that it could be repeated.                                                                                                                                                                               | 6-7, and Table 1   |
| Study selection                    | 9  | State the process for selecting studies (i.e., screening, eligibility, included in systematic review, and, if applicable, included in the meta-analysis).                                                                                                                                                   | 8                  |
| Data collection process            | 10 | Describe method of data extraction from reports (e.g., piloted forms, independently, in duplicate) and any processes for obtaining and confirming data from investigators.                                                                                                                                  | 9                  |
| Data items                         | 11 | List and define all variables for which data were sought (e.g., PICOS, funding sources) and any assumptions and simplifications made.                                                                                                                                                                       | 9                  |
| Risk of bias in individual studies | 12 | Describe methods used for assessing risk of bias of individual studies (including specification of whether this was done at the study or outcome level), and how this information is to be used in any data synthesis.                                                                                      | 9, 10-11           |
| Summary measures                   | 13 | State the principal summary measures (e.g., risk ratio, difference in means).                                                                                                                                                                                                                               | n/a                |
| Synthesis of results               | 14 | Describe the methods of handling data and combining results of studies, if done, including measures of consistency (e.g., $I^2$ ) for each meta-analysis.                                                                                                                                                   | 12                 |

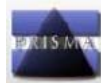

# PRISMA 2009 Checklist

Page 1 of 2

| Section/topic                 | #  | Checklist item                                                                                                                                                                                           | Reported on page #       |
|-------------------------------|----|----------------------------------------------------------------------------------------------------------------------------------------------------------------------------------------------------------|--------------------------|
| Risk of bias across studies   | 15 | Specify any assessment of risk of bias that may affect the cumulative evidence (e.g., publication bias, selective reporting within studies).                                                             | n/a                      |
| Additional analyses           | 16 | Describe methods of additional analyses (e.g., sensitivity or subgroup analyses, meta-regression), if done, indicating which were pre-specified.                                                         | n/a                      |
| <b>RESULTS</b>                |    |                                                                                                                                                                                                          |                          |
| Study selection               | 17 | Give numbers of studies screened, assessed for eligibility, and included in the review, with reasons for exclusions at each stage, ideally with a flow diagram.                                          | 12, and Figure 1         |
| Study characteristics         | 18 | For each study, present characteristics for which data were extracted (e.g., study size, PICOS, follow-up period) and provide the citations.                                                             | 13-18, including Table 3 |
| Risk of bias within studies   | 19 | Present data on risk of bias of each study and, if available, any outcome level assessment (see item 12).                                                                                                | 12-13, and Table 2       |
| Results of individual studies | 20 | For all outcomes considered (benefits or harms), present, for each study: (a) simple summary data for each intervention group (b) effect estimates and confidence intervals, ideally with a forest plot. | 18                       |
| Synthesis of results          | 21 | Present results of each meta-analysis done, including confidence intervals and measures of consistency.                                                                                                  | 18-20                    |
| Risk of bias across studies   | 22 | Present results of any assessment of risk of bias across studies (see Item 15).                                                                                                                          | n/a                      |
| Additional analysis           | 23 | Give results of additional analyses, if done (e.g., sensitivity or subgroup analyses, meta-regression [see Item 16]).                                                                                    | n/a                      |
| <b>DISCUSSION</b>             |    |                                                                                                                                                                                                          |                          |
| Summary of evidence           | 24 | Summarize the main findings including the strength of evidence for each main outcome; consider their relevance to key groups (e.g., healthcare providers, users, and policy makers).                     | 21-23                    |
| Limitations                   | 25 | Discuss limitations at study and outcome level (e.g., risk of bias), and at review-level (e.g., incomplete retrieval of identified research, reporting bias).                                            | 23                       |
| Conclusions                   | 26 | Provide a general interpretation of the results in the context of other evidence, and implications for future research.                                                                                  | 24                       |
| <b>FUNDING</b>                |    |                                                                                                                                                                                                          |                          |
| Funding                       | 27 | Describe sources of funding for the systematic review and other support (e.g., supply of data); role of funders for the systematic review.                                                               | 25                       |

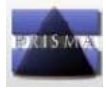

# PRISMA 2009 Checklist

For peer review only

- 1
- 2
- 3
- 4
- 5
- 6
- 7
- 8
- 9
- 10
- 11
- 12
- 13
- 14
- 15
- 16
- 17
- 18
- 19
- 20
- 21
- 22
- 23
- 24
- 25
- 26
- 27
- 28
- 29
- 30
- 31
- 32
- 33
- 34
- 35
- 36
- 37
- 38
- 39
- 40
- 41
- 42
- 43
- 44
- 45
- 46
- 47

# BMJ Open

## A systematic review of enablers and barriers to the implementation of Socially Assistive Humanoid Robots in health and social care

|                                 |                                                                                                                                                                                                                                                                                                                                                                                                                 |
|---------------------------------|-----------------------------------------------------------------------------------------------------------------------------------------------------------------------------------------------------------------------------------------------------------------------------------------------------------------------------------------------------------------------------------------------------------------|
| Journal:                        | <i>BMJ Open</i>                                                                                                                                                                                                                                                                                                                                                                                                 |
| Manuscript ID                   | bmjopen-2019-033096.R1                                                                                                                                                                                                                                                                                                                                                                                          |
| Article Type:                   | Original research                                                                                                                                                                                                                                                                                                                                                                                               |
| Date Submitted by the Author:   | 23-Sep-2019                                                                                                                                                                                                                                                                                                                                                                                                     |
| Complete List of Authors:       | Papadopoulos, Rena; Middlesex University, Research Centre for Transcultural Studies in Health<br>Koulouglioti, Christina; Middlesex University, Research Centre for Transcultural Studies in Health; Western Sussex Hospitals NHS Foundation Trust, Research and Innovation<br>lazzarino, runa; Middlesex University,<br>Ali, Sheila; Middlesex University, Research Centre for Transcultural Studies in Health |
| <b>Primary Subject Heading</b>: | Geriatric medicine                                                                                                                                                                                                                                                                                                                                                                                              |
| Secondary Subject Heading:      | Geriatric medicine                                                                                                                                                                                                                                                                                                                                                                                              |
| Keywords:                       | Socially assistive humanoid robots, artificial intelligence, health and social care, older adults, systematic review                                                                                                                                                                                                                                                                                            |
|                                 |                                                                                                                                                                                                                                                                                                                                                                                                                 |

SCHOLARONE™  
Manuscripts



**Article title**

A systematic review of enablers and barriers to the implementation of Socially Assistive Humanoid Robots in health and social care

**Authors information**

Professor Irena Papadopoulos PhD, RM, RN, FHEA (corresponding author),  
Head, Research Centre for Transcultural Studies in Health,  
Department of Mental Health and Social Work  
School of Health and Education,  
Middlesex University,  
The Burroughs,  
London NW4 4BT, UK.  
Tel: +44 208 411 6626  
Email: R.Papadopoulos@mdx.ac.uk  
ORCID: 0000-0001-6291-4332

Dr Christina Koulouglioti, PhD, RN  
Research Centre for Transcultural Studies in Health, Middlesex University, London, UK, and  
Research and Innovation Department, Western Sussex Hospitals NHS Foundation Trust,  
Worthing, UK  
ORCID: 0000-0003-3227-6696

Dr Runa Lazzarino, PhD  
Research Centre for Transcultural Studies in Health, Middlesex University, London, UK  
ORCID: 0000-0002-4206-4913

Sheila Ali, MSc  
Research Centre for Transcultural Studies in Health, Middlesex University, London, UK  
ORCID: 0000-0002-2614-0867

**Keywords**

Socially assistive humanoid robots, health and social care, older adults, artificial intelligence, systematic review

**Word Count**

5,625

## Abstract

**Objectives:** Socially assistive humanoid robots are considered a promising technology to tackle the challenges in health and social care posed by the growth of the ageing population. The purpose of our study was to explore the current evidence on barriers and enablers for the implementation of humanoid robots in health and social care.

**Design:** Systematic review of studies entailing hands-on interactions with a humanoid robot

**Setting:** From April 2018 to June 2018, databases were searched using a combination of the same search terms for articles published during the last decade. Data collection was conducted by using the *Rayyan* software, a standardised predefined grid, and a risk of bias and a quality assessment tool.

**Participants:** Post-experimental data were collected and analysed for a total of 420 participants. Participants comprised: older adults (n=307) aged  $\geq 60$  years, with no or some degree of age-related cognitive impairment, residing either in residential care facilities or at their home; care home staff (n=106); and informal caregivers (n=7).

**Primary outcomes:** Identification of enablers and barriers to the implementation of socially assistive humanoid robots in health and social care, and consequent insights and impact. Future developments to inform further research.

**Results:** Twelve studies met the eligibility criteria and were included. None of the selected studies had an experimental design, hence overall quality was low with high risks of biases. Several studies had no comparator, no baseline, small samples, and self-reported measures only. Within this limited evidence base, the enablers found were enjoyment, usability, personalisation, and familiarisation. Barriers were related to technical problems, to the robots' limited capabilities, and the negative preconceptions towards the use of robots in healthcare. Factors which produced mixed results were the robot's human-like attributes, previous experience with technology, and views of formal and informal carers.

**Conclusions:** The available evidence related to implementation factors of socially assistive humanoid robots for older adults is limited, mainly focusing on aspects at individual level, and exploring acceptance of this technology. Investigation of elements linked to the environment, organisation, societal and cultural milieu, policy and legal framework is necessary.

**Protocol registration:** Prospero CRD42018092866.

## Strengths and limitations of this study

- This review is the first to date focusing on the issues related to the pragmatic implementation of socially assistive humanoid robots in health and social care settings catering to the needs of older adults.
- Quality assessment of the included studies was based on two combined tools to account for the heterogeneity of the underlying study designs.
- Three authors were involved in critical steps of the review (article selection, data extraction, quality assessment of the included studies), and this constitutes a strength of the study.
- The heterogeneity between studies on key issues, such as participants' cognitive health and residential context, study designs and outcomes, prevents quantitative synthesis and hampers consistent assessment of the implementation of socially assistive humanoid robots in health and social care.

Peer review only

## INTRODUCTION

### Rationale

The current global landscape in health and social care is highly challenging, demanding innovative and effective actions from policy makers and service providers. For example, it is projected that by 2050 the world's population over the age of 60 years will be about two billion, an increase of 900 million from 2015. [1] Shortages of health care professionals and a growing ageing population place enormous pressures onto the health and social care systems of many countries. Older adults are living longer with chronic problems and/or disabilities.

At the same time, the size of formal and informal healthcare workforce is shrinking.

The use of artificial intelligence (AI) and robotics provides a major opportunity towards meeting some of the care needs of older adults. [2,3] An advanced form of AI is the one used in Socially Assistive Humanoid Robots (SAHRs). These robots use gestures, speech, facial recognition, movements, and, in general, social interaction to assist their users. [4] The robot's goal is to create close and effective interaction with the human user for the purpose of giving assistance and achieving measurable progress in convalescence, rehabilitation, learning, and well-being.

In a systematic review of the literature about the use of different available technologies directed to assist older adults, robotic devices and robots were viewed as an encouraging technology that can assist and prolong older adults' independent living. [5] Corroborating this finding, a few additional reviews of the literature have indicated that: (i) SAHRs could have multiple roles in the care of older adults, such as in affective therapy and cognitive training [6] and (ii) they could be beneficial in reducing anxiety, agitation, loneliness, and improving

1  
2  
3 quality of life, engagement, and interaction (especially when used as a therapeutic tool when  
4 caring for patients with dementia). [7–9] In addition, reviews related to the acceptance of  
5 robots have found it being influenced by numerous factors, such as the perceived need for the  
6 technology, the user's previous experiences with it, age, level of education, expectations  
7 about what the technology can do, attitudes, and cultural background; [10] in fact, robots that  
8 were programmed to use verbal and non-verbal communication familiar to the user and to  
9 their cultural background were more easily accepted by users. [11] Furthermore, a review of  
10 qualitative studies on older adults' experiences with socially assistive robots revealed the  
11 complexity of issues associated with their use with older adults, and how these impacted on  
12 their attitudes towards robots. [12] For example, issues related to the 'role' that the robot  
13 could acquire and to the nature of the Human-Robot Interaction (HRI) revealed a mixture of  
14 opinions and emotions. Parallel enquires among health and social care professionals have  
15 identified various areas where humanoid and animal-like robots can be helpful, but reported  
16 mixed views about their use in health care settings, raising issues of staff and patients' safety,  
17 and the protection of their privacy. [13] On a similar note, a recent qualitative exploration  
18 among different stakeholders in the healthcare context revealed that ethical and legal  
19 challenges, the lack of interests from professionals and patients, and concerns related to the  
20 robot's appearance and robotic expectations were major barriers to their potential use. [14]  
21 Frennert *et al's* review [15] focused mainly on concerns that need attention when considering  
22 the social robots and older adults interface, and urged developers to adopt a more pragmatic  
23 and realistic idea of an older adult. Their recommendations addressed the inclusion of older  
24 adults in the development process, without considering them incapable of expressing their  
25 needs and offering possible solutions to their own problems.

26  
27  
28  
29  
30  
31  
32  
33  
34  
35  
36  
37  
38  
39  
40  
41  
42  
43  
44  
45  
46  
47  
48  
49  
50  
51  
52  
53  
54  
55  
56  
57 All current reviews shed some light on certain aspects of this complicated relationship: older  
58  
59  
60

1  
2  
3 adults and socially assistive robots. However, in order to effectively meet the care needs of an  
4  
5 ageing population, it is imperative to identify and disseminate the full range of evidence-  
6  
7 based information of this form of technology. Such evidence will enable people to discuss the  
8  
9 possible solutions offered by SAHRs, in a more measured and informed way. This is  
10  
11 particularly important in our days, since public attitudes towards robots may be also  
12  
13 influenced by the media, often in negative ways. As an instance, while the use of robots will  
14  
15 undeniably change the workforce, many people believe that these changes will only be  
16  
17 negative. Example of catastrophic depictions of the use of AI in health and social care are  
18  
19 that robots will take over human professionals' jobs, that robots will be dangerous, or that  
20  
21 they are incapable of providing care that is culturally appropriate and compassionate. [16–19]  
22  
23  
24  
25 A counter argument is that the use of such technology does require very specialised skills,  
26  
27 and therefore the need for new technical jobs will increase in order to use robots in practice.  
28  
29  
30 [20]  
31  
32  
33

### 34 **Objective**

35  
36  
37 Our review aims to understand what the current enablers and barriers to the use and  
38  
39 implementation of SAHRs are, and concentrates on articles that describe the actual use of  
40  
41 socially assistive humanoid robots among older adults. The primary focus is on exploring and  
42  
43 identifying the factors that might facilitate or hinder the implementation of SAHRs in health  
44  
45 and social care for older adults.  
46  
47  
48  
49

## 50 **METHODS**

### 51 **Information sources and search strategies**

52  
53  
54  
55  
56  
57 The search strategy was developed for MEDLINE with appropriate modifications to match  
58  
59  
60

the terminology used in other databases. Databases were searched between 9<sup>th</sup> April 2018 and 8<sup>th</sup> June 2018. In view of the recent adoption of this form of technology, we limited the search date to the previous ten years. Subject headings and free text terms were used according to the specific requirements of each database. Table 1 presents full search strategy with search terms across the following bibliographic electronic databases: the Cochrane Central Register of Controlled Trials (CENTRAL); 2017 MEDLINE via OVID; Embase via OVID; Science Citation Index; CINAHL (Cumulative Index to Nursing and Allied Health Literature); LILACS (Latin American and Caribbean Health Sciences Information database); IEEE Xplore digital library; PsycINFO; Google Scholar; European Commission and Eurobarometer. We also conducted the following additional searches: ACM Digital Library, Computer Source Lecture Notes in Computer Science; Science Direct. In addition to traditional searching, reverse citation screenings of the reference lists of relevant articles (ie, including the key terms such as socially assistive humanoid robots and home care) and forward citations (articles which have cited the identified papers) were conducted. The references of eligible reports and key review articles were examined for other potentially relevant studies.

---

**Table 1.** Core set of search terms

---

"socially assistive robot\*" OR "socially assist\*" OR "social assist\*" AND robot\*

AND "social care" OR "home care services" OR "home care" OR "care home\*" OR "nursing home\*" OR "residential facilit\*" OR "assisted living facilit\*" OR "group home\*" OR "home\* for the aged" OR "community health services" OR "self-help devices" OR self\* AND care\* AND management AND help OR "social support" OR "interpersonal relations" OR "nursing care" OR "point of care" OR "aged care" OR "activities of daily living" OR care\* OR healthcare OR social\*

NOT Animals NOT Infant OR Child\* OR pediatr\* OR paediatr\*

---

1  
2  
3 All records were uploaded into Rayyan software, a systematic review software, similar to  
4 Covidence, [21] for managing citations for title and abstract screening and study  
5 selection.[22] The software was used for the process of de-duplicating, and independently  
6 exploring, screening abstracts and full texts, excluding and including studies based on pre-  
7 specified criteria. Any disagreements regarding eligibility were discussed, and, if required, a  
8 third researcher was consulted, and consensus reached. Figure 1 summarises the selection of  
9 studies in accordance with PRISMA guidelines. [23]  
10  
11  
12  
13  
14  
15  
16  
17  
18  
19

### 20 **Selection criteria**

21  
22  
23 Studies that considered the application of socially assistive humanoid robots only (ie, not  
24 animal-like robots) in health and social care were included. These were not restricted to  
25 experimental designs (Table 2). In view of the likelihood of a paucity of potentially eligible  
26 studies relevant to this clinical topic, we also considered observational, cohort, case-control,  
27 and qualitative studies. Editorials, conference abstracts, and opinion pieces were excluded.  
28 Only adult and older adult care settings were included (eg, long term, rehabilitation, inpatient  
29 and outpatient hospital care, community, and social care). The target population covered all  
30 stakeholders who were part of the process of implementation of SAHRs in health and social  
31 care in the broadest perspective (eg, users, staff, caregivers), and it was not limited to the  
32 aged population. Studies that included any type of direct exposure to SAHRs were selected.  
33  
34  
35  
36  
37  
38  
39  
40  
41  
42  
43  
44  
45  
46  
47  
48

### 49 **Data extraction and synthesis of the results**

50  
51  
52 Study details and outcome data were collected independently by two researchers with a  
53 piloted data extraction form (see Supplementary File 1). The process was validated by  
54 assessing the data extraction form on a small number of studies ( $n = 4$ ) that two researchers  
55  
56  
57  
58  
59  
60



1  
2  
3 assessed independently and compared. Type of study/design, date of publication, country and  
4  
5 specific setting (ie, care facility), intervention (ie, type of SAHR), sample and characteristics  
6  
7 of participants, and primary outcomes were identified (Table 3). Primary outcomes entailed  
8  
9 the identification of enablers and barriers to the implementation of SAHRs in health and  
10  
11 social care. Barriers were defined as those impeding the implementation of SAHRs which  
12  
13 may include factors, issues, or themes at local, system, or policy level. Enablers were defined  
14  
15 as mechanisms and initiatives whereby patients, providers, or policy makers contribute to  
16  
17 facilitating the positive uptake and implementation of a SAHR.  
18  
19  
20  
21  
22

23 The heterogeneity of the studies included in this review did not enable a standard quantitative  
24  
25 synthesis (ie, meta-analysis) to be performed. Instead, a narrative synthesis of the results was  
26  
27 conducted and presented in the form of a summary table (Table 3) and figure (Figure 2). All  
28  
29 results were discussed and weighted by three researchers with the aim of identifying a  
30  
31 frequency-based ranking of importance in relation to enablers, barriers, and mixed  
32  
33 results. Any uncertainties were resolved via a consensus-based decision. The protocol for this  
34  
35 systematic review has been registered and published on PROSPERO (ID:  
36  
37 CRD42018092866). Ethics approval was not required for this research.  
38  
39  
40  
41

## 42 RESULTS

### 43 Search results and included studies

44  
45  
46 A total of twelve studies were included in our analyses: six mixed-method, non-randomised  
47  
48 user experience trials; [24–29] two pre-post experimental surveys; [30,31] one mixed-  
49  
50 method, longitudinal experience trial; [32] two post-experimental surveys; [33,34] and one  
51  
52 ethnographic study. [35] (Figure 1. PRISMA Flow Chart).  
53  
54  
55  
56  
57  
58  
59  
60

## Assessment of risk of bias and quality of included studies

The quality of studies was assessed for all included studies with the following two assessments tools: the Cochrane Collaboration's tool for assessing risk of bias [36] and the Critical Appraisal for Public Health [37] (Table 2). The research team decided that two researchers independently assessed four (ie, 1/3) of included studies and compared their results in order to ensure the validity and reliability of the process. Disagreements were resolved via the involvement of a third member of the research team and group discussions.

None of the selected studies had an experimental design, hence overall quality was low with high risks of biases (Table 2). Most studies had no comparator and no baseline. [24–29,32,34,35] Additional methodological limitations affecting the non-randomised, quasi-experimental design of the studies were: very small samples' sizes, with only one study involving more than 100 participants; [32] and self-reported measures, [24,28–31,33,34] not always in combination with observation and/or data retrieved from the robot. [25–27,32] Seven studies [27–29,31,32,34,35] used validated instruments informed by existing theoretical models; [38–41] two studies reported the drop-out rate but did not mention the handling of missing data. [26,31] Three studies did not report any information on ethical approvals or consent received from the participants. [25,32,33] Protocols, trial pre-registration, and fidelity checks were not found in any of the studies. Four studies reported no information about funding. [27,29,32,34]

**Table 2.** Risk of bias and quality assessment of included studies

| Authors<br>Year                | Selection Bias<br>Random<br>Sequence<br>Generation <sup>i</sup> | Allocation<br>Concealment | Performance<br>Bias<br>Blinding of<br>Participants and<br>Personnel | Detection Bias<br>Blinding of<br>Outcome<br>Assessment | Attrition<br>Bias<br>Incomplete<br>Outcome<br>Data | Reporting<br>Bias<br>Selective<br>Reporting | Other Bias<br>and Limitations <sup>ii</sup>                                                                                                               |
|--------------------------------|-----------------------------------------------------------------|---------------------------|---------------------------------------------------------------------|--------------------------------------------------------|----------------------------------------------------|---------------------------------------------|-----------------------------------------------------------------------------------------------------------------------------------------------------------|
| 1 Bedaf et al.<br>(2017)       | –                                                               | –                         | –                                                                   | –                                                      | –                                                  | –                                           | Self-reported measures; no fidelity checks reported; small sample; gender imbalance; two-time interaction; not real home                                  |
| 2 Beuscher et al.<br>(2017)    | –                                                               | –                         | –                                                                   | –                                                      | –                                                  | –                                           | Self-reported measures; self-selected, very small, and WEIRD <sup>iii</sup> sample; no fidelity checks reported; SAHR small in size; one-time interaction |
| 3 Caleb-Solly et al.<br>(2018) | –                                                               | –                         | –                                                                   | –                                                      | –                                                  | –                                           | Not clear statistics; sampling unclear; small sample; no ethics reported; no fidelity checks reported                                                     |
| 4 Hebesberger et al.<br>(2017) | –                                                               | –                         | –                                                                   | –                                                      | –                                                  | –                                           | Sampling unclear; small sample; lack of validity of both qualitative and quantitative measures; low return on missing data                                |

For peer review only

| Authors<br>Year            | Selection Bias<br>Random<br>Sequence<br>Generation | Allocation<br>Concealment | Performance<br>Bias<br>Blinding of<br>Participants and<br>Personnel | Detection Bias<br>Blinding of<br>Outcome<br>Assessment | Attrition<br>Bias<br>Incomplete<br>Outcome<br>Data | Reporting<br>Bias<br>Selective<br>Reporting | Other Bias<br>and Limitations                                                                                                                                      |
|----------------------------|----------------------------------------------------|---------------------------|---------------------------------------------------------------------|--------------------------------------------------------|----------------------------------------------------|---------------------------------------------|--------------------------------------------------------------------------------------------------------------------------------------------------------------------|
| 5 Khosla et al.<br>(2017)  | -                                                  | -                         | -                                                                   | -                                                      | -                                                  | +                                           | Not same cohort and not same RCF throughout the study; no fidelity checks reported; no ethics reported                                                             |
| 6 Loi et al.<br>(2017)     | -                                                  | -                         | -                                                                   | -                                                      | -                                                  | -                                           | Self-reported measures; very small sample; low response rate; one-group design; large drop out at follow up; exposure poorly measured; no fidelity checks reported |
| 7 Louie et al.<br>(2014)   | -                                                  | -                         | -                                                                   | -                                                      | -                                                  | +                                           | Self-reported measures; sampling unclear; small, gender-imbalanced sample; low response rate; no ethics reported                                                   |
| 8 Piezzo et al.<br>(2017)  | -                                                  | -                         | -                                                                   | -                                                      | +                                                  | -                                           | Sampling unclear; very small sample; no baseline data; no fidelity check; ethical approval not reported (only informed consent)                                    |
| 9 Sabelli et al.<br>(2011) | -                                                  | -                         | -                                                                   | -                                                      | -                                                  | -                                           | Qualitative study; no comparator; no baseline; no confounders considered                                                                                           |

1  
2  
3  
4  
5  
6  
7  
8  
9  
10  
11  
12  
13  
14  
15  
16  
17  
18  
19  
20  
21  
22  
23  
24  
25  
26  
27  
28  
29  
30  
31  
32  
33  
34  
35  
36  
37  
38  
39  
40  
41  
42  
43  
44  
45  
46

| Authors Year            | Selection Bias<br>Random Sequence Generation | Allocation Concealment | Performance Bias<br>Blinding of Participants and Personnel | Detection Bias<br>Blinding of Outcome Assessment | Attrition Bias<br>Incomplete Outcome Data | Reporting Bias<br>Selective Reporting | Other Bias and Limitations                                                                                                                                    |
|-------------------------|----------------------------------------------|------------------------|------------------------------------------------------------|--------------------------------------------------|-------------------------------------------|---------------------------------------|---------------------------------------------------------------------------------------------------------------------------------------------------------------|
| 10 Torta et al. (2014)  | -                                            | -                      | -                                                          | -                                                | -                                         | -                                     | Self-reported measures; sampling unclear; small sample; low return on missing data; ethical approval not reported (only informed consent)                     |
| 11 Werner et al. (2012) | -                                            | -                      | -                                                          | -                                                | -                                         | -                                     | Sampling unclear; small sample; no comparator; baseline data not reported; ethical approval not reported (only informed consent); no fidelity checks reported |
| 12 Wu et al. (2014)     | -                                            | -                      | -                                                          | -                                                | +                                         | +                                     | Partly self-selected sample; no fidelity checks reported                                                                                                      |

+ = low risk of bias; - = high risk of bias

<sup>i</sup> None of the studies was an RCT, therefore no randomization was present. This also affects general quality of the studies, which overall were at high risk of all types of bias, with some exception in Attrition and Reporting bias only.

<sup>ii</sup> Incorporation of evaluations conducted with Critical Appraisal for Public Health Checklist (Heller et al. 2007).

<sup>iii</sup> WEIRD stands for Western Educate Industrialised Rich Democratic.

## Characteristics of selected studies

Table 3 presents characteristics and outcomes of the twelve included studies.

### Population

Post-experimental data were collected and analysed for a total of 420 participants, including 73% of older adults ( $n=307$ ), 2% of informal carers (ie, older adults' children,  $n = 7$ ) and 31% of formal caregivers and staff ( $n = 106$ ). The cohort of participants in two of the selected studies was the same [28,29], however we resolved to count participants twice because aims, measures, and results of the two studies were different. In eleven of the twelve selected studies, participants were older adults aged  $\geq 60$ , with an overall mean age of 79.8 years.

Among these eleven studies, one also included professional and informal caregivers, [24] and two considered Residential Care Facility (RCF) staff as well. [26,35] One study only involved staff in a RCF for younger adults affected by neuropsychiatric conditions. [31] Three studies included older adults affected by dementia and other conditions of ageing-related, cognitive impairment. [25,26,32] One study compared older adults affected by Mild Cognitive Impairment (MCI) with a Cognitively Intact Healthy (CIH) group, [27] whereas another one did not compare the two groups. [30] Five studies selected CIH older adults, [24,28,29,34,35] whereas in another one participants' condition was not reported. [33] Since one study did not report the gender of the 55 older adults taking part in the study [35], out of 365 participants, 69% were female. Participants' level of education was only considered in three studies where over 80% of participants had at least a bachelor degree. [27,30,33]

**Table 3.** Summary table of included studies

|   | <b>Authors<br/>Year</b>   | <b>Aim</b>                                                             | <b>Participants and<br/>Sampling</b>                                                                                                                                                                                                                      | <b>Methodology and Data<br/>Collection</b>                                                                                                          | <b>Intervention</b>                                                                                                                                                       | <b>Findings related to enablers (E) and<br/>barriers (B)</b>                                                                                                                                                                                                                                                         |
|---|---------------------------|------------------------------------------------------------------------|-----------------------------------------------------------------------------------------------------------------------------------------------------------------------------------------------------------------------------------------------------------|-----------------------------------------------------------------------------------------------------------------------------------------------------|---------------------------------------------------------------------------------------------------------------------------------------------------------------------------|----------------------------------------------------------------------------------------------------------------------------------------------------------------------------------------------------------------------------------------------------------------------------------------------------------------------|
| 1 | Bedaf et al.<br>(2017)    | Capture the experience of living with a robot at home                  | Aged 60+ ( $\mu = 78.9$ ) participants living at home in the Netherlands, with no cognitive decline and receiving home care ( $n = 10$ ), informal caregivers ( $n = 7$ ), and professional caregivers ( $n = 11$ ). Non-probability convenience sampling | Mixed-method, no comparator, no baseline. Questionnaire and semi-structured interviews                                                              | Care-O-bot 3. Two-part-scenario, highly structured user test administered twice to each participant (preceded by a practise session). Duration of user test session: 1.5h | <b>E:</b> previous experience with technology; enjoyable experience; support to prolong independent living; tailored care; enhanced intelligence and social skills<br><b>B:</b> technical problems; limited performance; lack of social interaction; arbitrary representations (e.g. changing colour of robot torso) |
| 2 | Beuscher et al.<br>(2017) | Determine impact of exposure to robots on perceptions and attitudes    | Age 65+ ( $\mu = 81.9$ ) participants with corrected vision and hearing that allowed them to engage in conversation with the SAHR, and physically able to participate in chair exercises ( $n = 19$ ). Non-probability convenience sampling               | Pre-post intervention survey. No comparator. The 32-item acceptance scale which measured: performance expectancy, effort expectancy, and attitudes. | NAO. Two sets of HRI experiments in an engineering lab (USA). The first set comprised of robot to one older adult, the second of robot to two older adults                | <b>E:</b> familiarisation; higher education; enjoyable and engaging experience; easiness to understand SAHR; SAHR's pleasant appearance<br><b>B:</b> life-like appearance (1/3 liked it); not feeling comfortable during HRI                                                                                         |
| 3 | Caleb-Solly et al. (2018) | Identify usability and user experience issues and how to overcome them | Aged 60+ ( $\mu = 79$ ) group suffering from some ageing-related impairments but with                                                                                                                                                                     | Mixed-method, no comparator, no baseline. Questionnaire, structured interview, user experience                                                      | Kompaï ( <i>Molly</i> in the UK, <i>Max</i> and <i>Charley</i> in the Netherlands)                                                                                        | <b>E:</b> trust; familiarisation; cooperative interaction approach (co-learning self-training system); creative and engaging ways; use of Wizard; individualisation and contextualisation                                                                                                                            |

| Authors<br>Year             | Aim                                                                                              | Participants and<br>Sampling                                                           | Methodology and Data<br>Collection                                                                                            | Intervention                                                                                                                                                                                                                                               | Findings related to enablers (E) and<br>barriers (B)                                                                                                                                                                                                                                |
|-----------------------------|--------------------------------------------------------------------------------------------------|----------------------------------------------------------------------------------------|-------------------------------------------------------------------------------------------------------------------------------|------------------------------------------------------------------------------------------------------------------------------------------------------------------------------------------------------------------------------------------------------------|-------------------------------------------------------------------------------------------------------------------------------------------------------------------------------------------------------------------------------------------------------------------------------------|
| 4 Hebesberger et al. (2017) | Investigate acceptance and experience of a long-term SAHR in a non-controlled, real-life setting | Staff members caring for older adults affected by dementia in care-hospital (Austria). | Mixed-method, no comparator, no baseline. Ten semi-structured interviews, live observations, and n = 70 online questionnaires | physical robotic unit. Exposure: orientation workshops, individual trials in assisted living studio, residential care home user experience trial, home apartment user experience trial. SCITOS robotic platform. 15-day-trial following a 5-day-pilot test | <b>B:</b> technical problems<br><br><b>E:</b> Mixed results on social acceptance; seen as a nice distraction, a novelty tool<br><br><b>B:</b> technical problems; robot's lack of capabilities; negative views (robots v humans); fear with new technology and with making mistakes |



| Authors<br>Year              | Aim                                                                     | Participants and<br>Sampling                                                                                                                                                                                                                  | Methodology and Data<br>Collection                                                                                                                                                                                                   | Intervention                                                                                                                                                                                      | Findings related to enablers (E) and<br>barriers (B)                                                                                                                                                                                                                                                                                                 |
|------------------------------|-------------------------------------------------------------------------|-----------------------------------------------------------------------------------------------------------------------------------------------------------------------------------------------------------------------------------------------|--------------------------------------------------------------------------------------------------------------------------------------------------------------------------------------------------------------------------------------|---------------------------------------------------------------------------------------------------------------------------------------------------------------------------------------------------|------------------------------------------------------------------------------------------------------------------------------------------------------------------------------------------------------------------------------------------------------------------------------------------------------------------------------------------------------|
| 5<br>Khosla et al.<br>(2017) | Study engagement and acceptability of SAHR amongst people with dementia | Aged 65-90 ( $\mu = 77.5$ ) home care residents, with dementia and other conditions, living in residential care facilities in Australia ( $n = 115$ ). Total reactions coded and analysed: $n = 8,304$ . Non-probability convenience sampling | Mixed-method, longitudinal experience trial. Video coding following engagement measures (emotional, visual, behavioural, verbal) during trial. Post-trial survey (acceptability based on Technology Acceptance Model, TAM)           | Matilda robotic unit. Designed activities in Matilda relevant to social context in RCFs in Australia. Repeated three-stage, 4- to 6- hours long, field trials in four residential care facilities | <b>E:</b> services' personalisation (e.g. songs and lyrics, integrated with human-like emotive expressions) accounting for users' disabilities; human-like features; personalisation underpinned in concept of personhood<br><br><b>B:</b> technology barrier can be broken by accounting for the context of service, robot interface, and users.    |
| 6<br>Loi et al.<br>(2017)    | Investigate SAHR acceptance and utilisation                             | Staff in a residential care facility for younger adults in Australia. Pre-questionnaire ( $n = 24$ ) Post-questionnaire ( $n = 8$ ). Non-probability convenience sampling                                                                     | Pre-post intervention survey. No comparator. TAM informed questionnaire with 6 statements pertaining to the staff themselves and 11 statements about the residents. Two post-questionnaire questions about the benefits and barriers | Betty. Two 1-hour long training /introductory sessions over 2 weeks. In addition, Betty spent 12 weeks at the residential care facility                                                           | <b>E:</b> individualisation; music; the enjoyment interacting with the robot, being comfortable with the robot, perceived usefulness that the robot will improve their daily life and well-being; Perceived beneficial for the patients<br><br><b>B:</b> excessive workload; negative assumptions on older residents' ICT skills; technical problems |
| 7<br>Louie et al.<br>(2014)  | Explore acceptance and attitude toward human-like expressive SAHR       | $N = 54$ older adults from a senior association (in Canada) ( $\mu = 76.5$ ). Non-probability convenience sampling                                                                                                                            | Post-experimental survey. No comparator. TAM informed questionnaire of 18 items measuring 7 constructs ( $N = 46$ completed the                                                                                                      | Brian 2.1. One 1.5 hour-long live demonstration following person-centred behaviours guidelines                                                                                                    | <b>E:</b> human-like communication is preferred over human-like appearance; gender (the male robot is more appreciate by female user)<br><br><b>B:</b> Feeling anxious with new technology                                                                                                                                                           |

| Authors<br>Year               | Aim                                                                             | Participants and<br>Sampling                                                                                                                                                                         | Methodology and Data<br>Collection                                                                                                                        | Intervention                                                                                                                             | Findings related to enablers (E) and<br>barriers (B)                                                                                                                                                                                                                                                                                                                      |
|-------------------------------|---------------------------------------------------------------------------------|------------------------------------------------------------------------------------------------------------------------------------------------------------------------------------------------------|-----------------------------------------------------------------------------------------------------------------------------------------------------------|------------------------------------------------------------------------------------------------------------------------------------------|---------------------------------------------------------------------------------------------------------------------------------------------------------------------------------------------------------------------------------------------------------------------------------------------------------------------------------------------------------------------------|
| 8<br>Piezzo et al.<br>(2017)  | A feasibility study to assess the use of SAHR as a walking motivational partner | N = 8 older adults with no cognitive problems ( $\mu = 82.5$ ) visiting a facility that provides short-term care in Japan. Non-probability convenience sampling                                      | questionnaire, of which $n = 37$ female)<br>Post-experiment motivation questionnaire (Intrinsic Motivation Inventory)                                     | Pepper used as a motivational walking partner. Older adults were asked to walk a short distance once on their own and once with the SAHR | * No relationship between previous experience and ease to use<br><b>E:</b> personalised interaction; SAHR's encouragement and positive comments                                                                                                                                                                                                                           |
| 9<br>Sabelli et al.<br>(2011) | Unveil the experience of older adults and staff with a SAHR                     | N = 55 cognitive healthy older adults ( $\mu = 83.9$ ) visiting a elderly care centre in Japan either once or twice a week; $n = 8$ female staff members<br>Non-probability convenience sampling     | Qualitative study based on ethnography (semi-structured interviews, transcription of interaction, observations). Grounded theory used for data analysis.  | Robovie2 placed for 3.5 months in an elderly day care centre. Robot teleoperated to engage in greetings and conversations                | <b>E:</b> basic social interactions (ie, greetings and being called by name) sharing the routine; conversations about personal issues; SAHR's kindness and encouragement leading to positive emotions; attributed role as a child to the SAHR; staff positive attitudes and actions to favour HRI; Japanese culture<br><b>B:</b> SAHR's limited mobility and voice volume |
| 10<br>Torta et al.<br>(2014)  | Investigate SAHR acceptance                                                     | N = 16 older adults cognitively healthy and able to perform physical exercises in a sitting position ( $\mu = 77$ ), recruited from two senior citizen centres in Austria and Israel ICT savvy older | Repeated post-experimental survey. No comparator. Almere Model informed questionnaire. Repeated post-trial de-briefing interview for qualitative analysis | NAO as communication interface with KSERA smart home system. Short- and long-term field trials involving 5                               | <b>E:</b> small anthropomorphic shape (low anxiety); adaptability to user's needs/personalisation; constant verbal communication; familiarisation (ease of use and sociability)<br><b>B:</b> small anthropomorphic shape (low social presence); technical malfunctions; familiarisation (as enjoyment linked to novelty effect)                                           |

| Authors<br>Year               | Aim                                 | Participants and<br>Sampling                                                                                                                                                                                                                                                                       | Methodology and Data<br>Collection                                                                                                                                                                                                                                                | Intervention                                                                                                                                                                      | Findings related to enablers (E) and<br>barriers (B)                                                                                                                                                                                                                                                                                                                                                                                                                                                                                      |
|-------------------------------|-------------------------------------|----------------------------------------------------------------------------------------------------------------------------------------------------------------------------------------------------------------------------------------------------------------------------------------------------|-----------------------------------------------------------------------------------------------------------------------------------------------------------------------------------------------------------------------------------------------------------------------------------|-----------------------------------------------------------------------------------------------------------------------------------------------------------------------------------|-------------------------------------------------------------------------------------------------------------------------------------------------------------------------------------------------------------------------------------------------------------------------------------------------------------------------------------------------------------------------------------------------------------------------------------------------------------------------------------------------------------------------------------------|
| 11<br>Werner et al.<br>(2012) | Evaluate HRI and<br>user experience | adults excluded. Non-<br>probability<br>convenience sampling<br>N = 16 older adults,<br>cognitively healthy<br>and able to perform<br>basic physical exercise<br>( $\mu = 77$ ), recruited<br>from two senior citizen<br>centres in Austria and<br>Israel. Non-probability<br>convenience sampling | Post-test questionnaires<br>containing KSERA HRI-<br>Scale, the HRI Godspeed<br>questionnaire, and<br>questions regarding user<br>acceptance. Notes on users'<br>loud observations during<br>test cases. Pre-test PANAS<br>scales to evaluate<br>participants' emotional<br>state | scenarios, totalling<br>22 trial iterations<br><br>NAO as<br>communication<br>interface with<br>KSERA smart<br>home system.<br>Three test cases<br>demonstrated twice<br>to users | * No relationship between acceptance and<br>user's cultural background<br><b>E:</b> SAHR as motivator and helper; safety;<br>sympathy, friendliness, intelligence<br><br><b>B:</b> technical problems (eg, navigation and<br>speech recognition); limited performance<br>negatively affecting human-likeness (eg.,<br>movement, navigation, and conversational<br>abilities)                                                                                                                                                              |
| 12<br>Wu et al.<br>(2014)     | Investigate SAHR<br>acceptance      | Older adults ( $\mu = 79.3$ )<br>with MCI and no<br>impairment ( $n = 11$ ) in<br>France. Non-<br>probability<br>convenience sampling                                                                                                                                                              | Mixed-method. Healthy<br>group compared with group<br>with MCI. No baseline, no<br>treatment-as-usual<br>comparator. Usability-<br>performance measures,<br>TAM informed acceptance<br>questionnaire, semi-<br>structured interview, and<br>focus group                           | Kompaï.<br>Participants<br>interacted with<br>SAHR in the<br>Living Lab once a<br>week for 4 weeks.<br>Duration of<br>interaction: 1 hour                                         | <b>E:</b> usability and amusement; encouragement to<br>use from formal and informal carers<br>professionals; sense of discovery and being up<br>to date with technology; familiarisation<br><b>B:</b> uneasiness with technology; feeling of<br>stigmatization (i.e. dependency and decline);<br>ethical/societal issues associated with robot use<br>(i.e., fear of societal dehumanisation /changing<br>human nature and what it means to care).<br>* MCI may encounter more difficulties; HIC<br>tended to show less positive attitude |

1  
2  
3 Similarly, in the four studies where data were collected on general Information and  
4  
5 Communication Technology (ICT) skills, 76% ( $n = 66$ ) of 87 participants reported regular  
6  
7 computer use. [25,27,30,33] In other two studies [28,29], highly experienced technology  
8  
9 users were excluded, following assessment. In these two studies, information around previous  
10  
11 contact with a SAHR on behalf of research participants is not explicit. However, if we  
12  
13 assume that high ICT experience implies previous contact with a SAHR, none of the  
14  
15 participants across all the studies had had any hands-on experience with SAHRs before  
16  
17 taking part in the studies. The largest post-experimental group consisted in Australian  
18  
19 participants ( $n = 123$ ). All the above figures includes neither data of subjects who dropped  
20  
21 out in pre-post studies [31,33] nor all data collected via observation of HRIs or interviews, as  
22  
23 sometimes this information was irretrievable or not reported. [26]  
24  
25  
26  
27  
28  
29

### 30 Settings and Interventions

31  
32  
33 Four trials were carried out in RCFs, [26,31,32,35] six in smart environments or university  
34  
35 laboratories, [24,27–30,33] and two in a combination of private apartment, RCF, and  
36  
37 laboratory. [25,34] None of the studies was conducted in an acute healthcare setting. Studies  
38  
39 were conducted in the following countries: six in a European context (Austria, UK,  
40  
41 Netherlands, France); [24–29] and two of these six in Israel as well; [28,29] two in Australia;  
42  
43 [31,32] two in Japan; [34,35] one in Canada; [33] and one in the USA. [30]  
44  
45  
46  
47

48 All studies included interventions where participants had their first hands-on experience  
49  
50 interacting with a SAHR. Eight different types of SAHRs were used which had different  
51  
52 appearances, bodily movements' abilities, often an additional mode of interaction beyond  
53  
54 voice-based (ie, built-in touch screen, touch sensors, tablet remote control). All were  
55  
56 customised with software packages providing a range of specific services.  
57  
58  
59  
60

1  
2  
3 In most studies, a pilot field test was conducted to establish familiarization. Pilot testing was  
4 deemed necessary particularly in those experiments where participants had to interact with  
5 the SAHR in highly structured scenarios performing specific tasks, sometimes following  
6 instructions. [24,25,27–30,34] This type of HRI lasted between 45 minutes [24] and up to 6  
7 hours. [32] Three studies adopted a design whereby HRI was not structured, and RCFs  
8 residents and members of staff freely chose to interact with the SAHR. [26,31,35]  
9  
10  
11  
12  
13  
14  
15  
16  
17

18 The HRIs in the twelve exposures involved the following services and activities: playing  
19 cognitive games such as Bingo, Hoy, and general knowledge games, including an orientation  
20 game with the support of pictures, ‘21 questions’, and ‘Simon says’ game; [25,27,30–33]  
21 listening to music, singing, storytelling, relaxation, dancing (including joint chair exercise)  
22 and physical training (including walking); [28–32,34,42] carry and delivery tasks; [24,25]  
23 call to a friend, calendar and reminders, such as to drink water, to do exercise, to take  
24 medication; [24,25,27,28] weather information; [28,31] restaurant finding; [33] and  
25 reception, greetings, and interactions; [26,35] medical measurement. [29]  
26  
27  
28  
29  
30  
31  
32  
33  
34  
35  
36  
37

### 38 **Narrative synthesis**

39  
40 Findings in terms of enablers and barriers are presented below and summarised in Figure 2.  
41  
42  
43

#### 44 **Enablers**

45  
46  
47  
48 *Enjoyment.* An enjoyable experience was found to be a crucial factor conducive to SAHRs’  
49 use and implementation. In ten trials (83%) participants highly valued enjoyment and  
50 engagement when interacting with the SAHR, both in terms of general positive HRI  
51 experience (eg, SAHR’s kindness, friendliness, provision of comfort and motivation) and in  
52 relation to specific activities (eg, listening to music and playing games). In one study only  
53  
54  
55  
56  
57  
58  
59  
60

1  
2  
3 [28], it is reported that participants to the long-term trials of the intervention commented  
4  
5 negatively with respect to their enjoyment in interacting with the robot, and furthermore that  
6  
7 this would decrease over time.  
8  
9

10  
11 *Usability.* Intuitiveness and easiness of use proved to be essential enablers towards the  
12  
13 implementation of SAHRs in six studies (50%). [24,25,27,28,30,32] Usability is to be  
14  
15 broadly intended in terms of lack of technical issues, intuitive interface, and design factoring  
16  
17 participants' disabilities.  
18  
19

20  
21 *Personalisation.* Engagement and enjoyment were found to be interlinked with the  
22  
23 personalisation of services, hence ultimately with overall use and implementation.  
24  
25 Personalisation should account for: adaptation to users' taste and preferences; [32,34] user's  
26  
27 care needs, [24] context, and routine; [25,35] and users' impairments. [27,32,35]  
28  
29  
30

31  
32 *Familiarisation.* Inasmuch as the robot should offer individualised services, users also should  
33  
34 learn about and adapt to the robot's status and intentions. [25] While the model of human-  
35  
36 robot co-dependent relationship is prominent in one study only, [25] other studies found  
37  
38 familiarisation to be an important factor positively affecting implementation. [27,28,30,32]  
39  
40 Interestingly, in one of these studies participants felt that, not only over time ease of use  
41  
42 would improve, but also that the relationship with the SAHR may turn into a friendship. [28]  
43  
44  
45

## 46 47 Barriers

48  
49  
50 *Technical problems.* Over half of the studies [24–26,28,29,31,35] explicitly stated that  
51  
52 technical issues with the robot itself constituted a barrier to SAHRs' implementation in health  
53  
54 and social care.  
55  
56  
57  
58  
59  
60

1  
2  
3 *SAHRs' limited capabilities.* The limited performance (ie, mobility, robots' voice, lack of  
4 interactive element) of the robot was found as a crucial barrier to use. This impediment was  
5 explicitly reported in four studies, [24,26,29,35] while more implicitly in other three, where  
6 the robot's restricted skills were described in terms of limited personalisation of services [32],  
7 adaptability, [28] and co-learning/self-training abilities. [25]  
8  
9

10  
11  
12  
13  
14  
15  
16 *Negative preconceptions.* In a study, health professionals' assumptions on older adults'  
17 capacity to interact with SAHR were included among the barriers to implementation. [31]  
18  
19 Two other studies elaborated on the negative views towards robots in terms of  
20 dehumanisation of care and society, [26,27] and of stigmatising effects associated to being a  
21 dependent individual in decline. [27] In three studies, negative preconceptions came from  
22 formal and informal carers rather than from older adults themselves. [24,26,31]  
23  
24  
25  
26  
27  
28  
29

### 30 Mixed views

31  
32  
33  
34 *Human-like attributes.* One study showed that human-like appearance was appreciated by  
35 one-third of the participants. [30] Another study reported that human-like communication  
36 was preferred over human-like appearance. [33] In the same study, 80% of the subjects  
37 completing the trial were older women who declared to prefer a male looking SAHR with  
38 male voice. [33] A third study concluded that SAHRs based on human-centred system with  
39 human-like characteristic are likely to enable acceptance and use. [32] However, in the same  
40 study, it was also reported that the fact that the SAHR was not judgemental facilitated  
41 interaction. [32] The ambivalence of having a non-judgmental conversational partner (ie,  
42 non-human) who was also given the overt social role of a human child was found beneficial  
43 to implementation in a fourth study. [35] SAHR's child-likeness was also found positive in a  
44 fifth study, and SAHR's small size was appreciated, albeit contributing to reduced acceptance  
45  
46  
47  
48  
49  
50  
51  
52  
53  
54  
55  
56  
57  
58  
59  
60

1  
2  
3 with low scores in attributed animacy and naturalness. [29] Similar ambivalent results are  
4  
5 found in a sixth study where again SAHR's small anthropomorphic shape was at the same  
6  
7 time responsible for low levels anxiety, but also for low scores in perceived social presence.  
8  
9 [28] In relation to social presence participants had contrasting views (ie, SAHR seen as pet or  
10  
11 a conversational partner). Differently from these last studies, in a seventh one participants did  
12  
13 not choose to walk side-by-side with the SAHR, as it would be natural with a human partner,  
14  
15 but chose to follow the SAHR, giving it the role of a guide. [34] Finally, in a eighth study, the  
16  
17 lack of more complex social interaction was identified as a barrier to implementation. [24]  
18  
19 None of the other studies provided any indication regarding the cultural attributes of the  
20  
21 SAHR. In one study only it is reported that the fact that the SAHR was speaking the same  
22  
23 language of the users was responsible of higher perceived ease of use compared to the cohort  
24  
25 where the SAHR was not using the users' native language. [28] In another study, it was  
26  
27 argued that the positive reception of the robot may be also attributed to the nature of the local  
28  
29 culture (ie, Japanese) towards robots. [35]  
30  
31  
32  
33  
34  
35

36 *Previous experience with ICT.* While one study found that previous experience with  
37  
38 technology positively correlated with use, [24] another trial found that there was no  
39  
40 relationship between previous experience and ease to use. [33] In other two studies, highly  
41  
42 experienced ICT users were excluded from participating in light of the argument that  
43  
44 acceptance is positively influenced by ICT experience. [28,29]  
45  
46  
47  
48

49 *The role of formal and informal caregivers.* As mentioned above, the negative attitudes of  
50  
51 formal and informal carers has been shown to constitute an impediment to SAHRs  
52  
53 implementation. [24,26,31] Conversely, two studies highlighted the enabling effect of the  
54  
55 encouragement for SAHRs' use on behalf of relatives and professionals. [27,35]  
56  
57  
58  
59  
60



## DISCUSSION

### Summary of evidence

Our review focused on the identification of factors that could facilitate or hinder the implementation of SAHRs in health and social care. We focused on actual interactions of older adults with social humanoid robots in different settings in order to better understand what the current issues are in regard to implementation. Enablers, such as enjoyment and personalisation, were mainly related to the use of robots at an individual level. The element of enjoyment in the HRI was also elsewhere found to be crucial among hospital patients, [43] opening the doors for considering social humanoid robots as an intervention to combat social isolation in hospital settings.

Barriers were related to technical problems and to current limited capabilities of the robots. Technology malfunction and/or technology limitations were reported as areas of concern, similar to the results of a recent survey of Korean nurses. Surprisingly for the heavily regulated field of healthcare, the issues of safety, ethics, and safeguarding were not identified in this review as significant implementation-related factors, even though nurses and healthcare workers have been raising these issues. Safety and ethical issues were reported as major concerns in previous systematic reviews, and it is imperative that future research investigates these issues and understands their implications. The field of social humanoid robots poses many ethical challenges especially because robots could be designed to assume different roles and for different purposes: from service robots assisting in concierge types jobs to companion robots. In agreement with Vandemeulebroucke *et al*,[44] we believe that an ethical approach demands that all stakeholders should have a voice in the current debate but also in the design of future technologies, their application, and implementation. We also

1  
2  
3 agree with Chou *et al* [45] that future planning should view all these factors under a broader  
4 policy framework, and policy makers should work collaborative to ensure the ethical and safe  
5 implementation of robots. The European commission advocates for the use of a new  
6 framework to address the ethical issues in healthcare robotics called ‘Responsible Research  
7 and Innovation’. [46] Under this framework, society, users, and innovators are mutually  
8 responsive and engage in an interactive and transparent process in order for acceptable,  
9 sustainable, and desirable products to be developed and embedded in our society. Robot’s  
10 appearance [24,30,32,33] and views of carers and relatives provided mixed results.  
11 [24,26,27,31] In regard to the appearance, Mori’s theory of the ‘uncanny valley’ is  
12 illuminating. [47] Between the animated and the perfectly realistic, human-like appearance of  
13 robots, there is an area where depictions can create uncomfortable feelings in humans.  
14 Therefore, life-like attributes of the robots, such as voice, facial expressions, gestures, bodily  
15 appearance, cultural attributes, and gender, have an impact on how the user experiences the  
16 robot, and on the HRI. The indeterminacy of robots’ appearance is reflected onto the dramatic  
17 variations of SAHRs found in the literature. We also know that one’s cultural background  
18 influences views and perceptions of the robot’s aesthetics, [11] but none of the studies  
19 provided any indication regarding the cultural attributes of the SAHR. Culturally specific  
20 research on the relationship between appearance, acceptance, and implementation is therefore  
21 promising in HRI studies.

22  
23  
24  
25  
26  
27  
28  
29  
30  
31  
32  
33  
34  
35  
36  
37  
38  
39  
40  
41  
42  
43  
44  
45  
46  
47  
48 According to our protocol, we searched for factors affecting the implementation of SAHRs  
49 by key stakeholders, such as health professionals. The role of formal and informal caregivers  
50 has been found as crucial. [48] However, the information we could yield was limited and  
51 mixed, and this is an area that urgently requires further research, involving longitudinal  
52 studies and larger samples. Longitudinal studies can provide the opportunity to investigate

1  
2  
3 whether fear of using a new and unfamiliar technology or losing interest in a new technology  
4 (diminishing novelty effect) are related to negative attitudes. Abbott *et al* [8] on their review  
5 of the use of social robotic pets (animal-like social robots) found similar mixed feelings from  
6 the different stakeholders. The fact that people have very strong feelings on the opposite sides  
7 of the spectrum, either very positive or very negative, is significant to implementation and  
8 requires a careful investigation. The current Topol review [49] addresses the changes and  
9 accompanied needs of the healthcare workforce that will be imposed by the digital revolution.  
10 It calls for an urgent need to educate and prepare the healthcare workforce for the imminent  
11 digital changes and for an organisational cultural change. However, it is hard to think how  
12 these transformation will happen when the current evidence reveals the existence of mixed  
13 opinions and negative attitudes towards at least the use of socially assistive robotic  
14 technologies.

15  
16  
17  
18  
19  
20  
21  
22  
23  
24  
25  
26  
27  
28  
29  
30  
31  
32 The completeness and overall applicability of the evidence is limited, mostly because it  
33 provides only insights into individual-level factors related to the acceptance of technology.  
34 This can be partly attributed to the main theoretical framework used in the studies. The  
35 Technology Acceptance Model (TAM) proposes in fact an explanation for a person's actual  
36 and intentional use of a technology through an exploration of their attitudes towards it. [38]  
37  
38  
39  
40  
41  
42  
43  
44  
45  
46  
47  
48  
49  
50  
51  
52  
53  
54  
55  
56  
57  
58  
59  
60  
The lack of evidence related to other main key stakeholders, such as formal and informal  
carers, along with factors related to the environment, policy, society and organisation is a  
major limitation. Exploring attitudes of other populations, such as formal caregivers, as well  
as the use of other theoretical models is considered critical. The field would benefit, for  
example, from the use of the Diffusion of Innovations Theory (DIT), [50] when considering  
research questions related to the use of SAHRs in healthcare; but also from theories that  
explore the co-existence of technology and caring, such the Theory of Technological

1  
2  
3 Competency as Caring in Nursing. [51] King and Barry [52] recently introduced a theoretical  
4 model that highlights caring theories when considering the design of healthcare robots.  
5  
6 Understanding how nursing care will change, or what will be the best interface of nurses with  
7 SAHRs is critical. In addition, how compassionate care will be understood, expressed, and  
8 studied is also essential. The --- model, that integrates compassion into culturally competent  
9 care, would be useful in exploring the interrelations between service users, nurses, health  
10 professionals, family members, and SAHRs. [53] Furthermore, researchers working in the  
11 area of human-robot interaction among older adults are calling for new ways to conceptualize  
12 aging and consequently robotic technologies. In particular, they advocate that the use of  
13 socially assistive robots should be studied under a model that focuses on ‘successful aging’  
14 rather than a ‘deficit model of aging’. They argue that the latter model – viewing aging a  
15 process of continued losses and older adults needing assistance – restricts the design of new  
16 technologies. A successful model of aging that focuses on the preservation of the user’s  
17 autonomy can instead provide new ways of using, designing, and implementing socially  
18 assistive robots. [54]

### 39 **Limitations**

40  
41  
42 As per protocol, our intention was to explore enablers and barriers to the implementation of  
43 SAHRs in both health and social care but, in fact, most of the activities assessed were more  
44 relevant to social care. Even medication reminders, which are obviously health-related, form  
45 an important part of social care. There is therefore little to inform health practitioners as to  
46 the possible application of SAHRs in health settings. Furthermore, very few studies have  
47 deployed and implemented SAHRs in health and social care settings, hence the available  
48 information is scant. In addition, quality of the studies is problematic (Table 2).

1  
2  
3 The heterogeneity of study designs led to the identification of factors in single studies. For  
4 example, only one study reported on the level of education as enabling factor of SAHRs'  
5 acceptance. [30] Another study found that fear of making mistakes with technology was a  
6 barrier to implementation. [26] However, in another study, uneasiness with technology  
7 seemed to be counterbalanced by a sense of discovery and being up-to-date with ICT. [27]  
8  
9  
10  
11  
12  
13  
14 The evidence is too scant to generalise these initial findings, and further research is needed to  
15 assess the impact of these, and other factors, onto SAHRs' acceptance and implementation in  
16 health and social care.  
17  
18  
19  
20  
21  
22

## 23 **CONCLUSION AND PERSPECTIVES**

24  
25  
26 The use of SAHRs is promising in responding to some of the care challenges of an ageing  
27 population. This systematic review summarised the enablers and barriers to the  
28 implementation of SAHRs in health and social care. Evidence suggests that enjoyment and  
29 personalisation are the chief enablers to the implementation of robots, whilst the two most  
30 important barriers had to do with technical problems and the limited capabilities of the  
31 robots. However, there are limitations to the evidence, as most studies were at high risk of  
32 bias involving very small samples. Gaps in the evidence include factors related to  
33 environment, organisation, socio-cultural milieu, policy and legal framework. Furthermore,  
34 the research focus has currently been placed on understanding the acceptance of robots by  
35 adult users, but there is no discussion of the needs of the healthcare workforce on a  
36 professional level, and how these needs are being met by educational institutions,  
37 professional organisations, and employers.  
38  
39  
40  
41  
42  
43  
44  
45  
46  
47  
48  
49  
50  
51  
52  
53  
54  
55  
56  
57  
58  
59  
60

## **Acknowledgments**

We would like to thank Dr Zbys Fedorowicz for his contributions and helpful advice.

## **Author statement**

RP and CK conceived and designed the study. CK and SA acquired, screened and conducted the initial data extraction. RP acted as a referee in the screening, analysis and interpretation of the data. RL and CK drafted the manuscript and RP provided the critical review of it. All authors approved the version to be published and agreed to be accountable for all the aspects of this work.

## **Funding**

This work was supported by CARESSES (Horizon 2020, Grant Agreement ID: 737858) and additional funds from the Middlesex University, School of Health & Education.

## **Competing interests' statement**

None. The authors whose names are listed above certify that they have NO affiliations with or involvement in any organization or entity with any financial interest or non-financial interest in the subject matter or materials discussed in this manuscript.

## **Data sharing statement**

Data are available upon reasonable request. Completed data extraction tables and Public Health Critical Appraisal Checklist tables for all studies are available from the corresponding author of this review and their use is permitted once their use is clarified. No additional information is available.

## **Patient and public involvement**

It was not appropriate or possible to involve patients or the public in this work.

Figure 1. PRISMA flow chart

Figure 2. Summary of results

## REFERENCES

- 1 World Health Organization. Ageing and health. 2018. <https://www.who.int/news-room/fact-sheets/detail/ageing-and-health> (accessed 2 Apr 2019).
- 2 UK Government. Policy Paper. The Grand Challenges. 2018. <https://www.gov.uk/government/publications/industrial-strategy-the-grand-challenges/industrial-strategy-the-grand-challenges> (accessed 8 Apr 2019).
- 3 Tapus A, Mataric MJ, Scassellati B. Socially assistive robotics [Grand Challenges of Robotics]. *IEEE Robotics & Automation Magazine* 2007;**14**:35–42. doi:10.1109/mra.2007.339605
- 4 Feil-Seifer D, Mataric MJ. Defining socially assistive robotics. In: *9th International Conference on Rehabilitation Robotics, 2005. ICORR 2005*. 2005. 465–8. doi:10.1109/ICORR.2005.1501143
- 5 Khosravi P, Ghapanchi AH. Investigating the effectiveness of technologies applied to assist seniors: A systematic literature review. *International Journal of Medical Informatics* 2016;**85**:17–26. doi:10.1016/j.ijmedinf.2015.05.014
- 6 Abdi J, Al-Hindawi A, Ng T, *et al*. Scoping review on the use of socially assistive robot technology in elderly care. *BMJ Open* 2018;**8**:e018815. doi:10.1136/bmjopen-2017-018815
- 7 Pu L, Moyle W, Jones C, *et al*. The Effectiveness of Social Robots for Older Adults: A Systematic Review and Meta-Analysis of Randomized Controlled Studies. *Gerontologist* 2019;**59**:e37–51. doi:10.1093/geront/gny046
- 8 Abbott R, Orr N, McGill P, *et al*. How do “robopets” impact the health and well-being of residents in care homes? A systematic review of qualitative and quantitative evidence. *Int J Older People Nurs* 2019;:e12239. doi:10.1111/opn.12239
- 9 Aarskog NK, Hunskår I, Bruvik F. Animal-Assisted Interventions With Dogs and Robotic Animals for Residents With Dementia in Nursing Homes: A Systematic Review. *Physical & Occupational Therapy In Geriatrics* 2019;**37**:77–93. doi:10.1080/02703181.2019.1613466
- 10 Broadbent E, Stafford R, MacDonald B. Acceptance of Healthcare Robots for the Older Population: Review and Future Directions. *Int J of Soc Robotics* 2009;**1**:319. doi:10.1007/s12369-009-0030-6
- 11 Papadopoulos I, Koulouglioti C. The Influence of Culture on Attitudes Towards Humanoid and Animal-like Robots: An Integrative Review. *J Nurs Scholarsh* 2018;**50**:653–65. doi:10.1111/jnu.12422

- 12 Vandemeulebroucke T, de Casterlé BD, Gastmans C. How do older adults experience and perceive socially assistive robots in aged care: a systematic review of qualitative evidence. *Aging Ment Health* 2018;**22**:149–67. doi:10.1080/13607863.2017.1286455
- 13 Papadopoulos I, Koulouglioti C, Ali S. Views of nurses and other health and social care workers on the use of assistive humanoid and animal-like robots in health and social care: a scoping review. *Contemp Nurse* 2018;**54**:425–42. doi:10.1080/10376178.2018.1519374
- 14 Cresswell K, Cunningham-Burley S, Sheikh A. Health Care Robotics: Qualitative Exploration of Key Challenges and Future Directions. *Journal of Medical Internet Research* 2018;**20**:e10410. doi:10.2196/10410
- 15 Frennert S, Östlund B. Review: Seven Matters of Concern of Social Robots and Older People. *Int J of Soc Robotics* 2014;**6**:299–310. doi:10.1007/s12369-013-0225-8
- 16 Elliott L. Workers at risk as robots set to replace 66m jobs, warns OECD. The Guardian. 2018. <https://www.theguardian.com/business/2018/apr/03/robots-could-take-over-more-than-65m-jobs-warns-oecd-report> (accessed 2 Apr 2019).
- 17 Chui M, Manyika J, Miremadi M. Where machines could replace humans--and where they can't (yet) | McKinsey Digital 2016. <https://www.mckinsey.com/business-functions/digital-mckinsey/our-insights/where-machines-could-replace-humans-and-where-they-cant-yet> (accessed 2 Apr 2019).
- 18 Papadopoulos I, Sgorbissa A, Koulouglioti C. Caring robots are here to help. *arXiv:180311243 [cs]* Published Online First: 22 March 2018. doi:10.7748/ns.31.51.18.s22.
- 19 Blair L. Mind healing: why are we so afraid of robots? The Telegraph. 2017. <https://www.telegraph.co.uk/health-fitness/mind/mind-healing-afraid-robots/> (accessed 2 Apr 2019).
- 20 Dahl TS, Boulos MNK. Robots in Health and Social Care: A Complementary Technology to Home Care and Telehealthcare? *Robotics* 2014;**3**:1–21. doi:10.3390/robotics3010001
- 21 Kellermeyer L, Harnke B, Knight S. Covidence and Rayyan. *J Med Libr Assoc* 2018;**106**:580–3. doi:10.5195/jmla.2018.513
- 22 Ouzzani M, Hammady H, Fedorowicz Z, *et al*. Rayyan—a web and mobile app for systematic reviews. *Syst Rev* 2016;**5**. doi:10.1186/s13643-016-0384-4
- 23 Moher D, Liberati A, Tetzlaff J, *et al*. Preferred Reporting Items for Systematic Reviews and Meta-Analyses: The PRISMA Statement. *PLOS Medicine* 2009;**6**:e1000097. doi:10.1371/journal.pmed.1000097



- 1  
2  
3 24 Bedaf S, Marti P, Amirabdollahian F, *et al.* A multi-perspective evaluation of a service  
4 robot for seniors: the voice of different stakeholders. *Disabil Rehabil Assist Technol*  
5 2017;**13**:592–9. doi:10.1080/17483107.2017.1358300  
6  
7  
8 25 Caleb-Solly P, Dogramadzi S, Huijnen CAGJ, *et al.* Exploiting ability for human  
9 adaptation to facilitate improved human-robot interaction and acceptance. *The*  
10 *Information Society* 2018;**34**:153–65. doi:10.1080/01972243.2018.1444255  
11  
12 26 Hebesberger D, Koertner T, Gisinger C, *et al.* A Long-Term Autonomous Robot at a  
13 Care Hospital: A Mixed Methods Study on Social Acceptance and Experiences of Staff  
14 and Older Adults. *Int J of Soc Robotics* 2017;**9**:417–29. doi:10.1007/s12369-016-0391-6  
15  
16  
17 27 Wu Y-H, Wrobel J, Cornuet M, *et al.* Acceptance of an assistive robot in older adults: a  
18 mixed-method study of human-robot interaction over a 1-month period in the Living Lab  
19 setting. *Clin Interv Aging* 2014;**9**:801–11. doi:10.2147/CIA.S56435  
20  
21  
22 28 Torta E, Werner F, Johnson DO, *et al.* Evaluation of a Small Socially-Assistive  
23 Humanoid Robot in Intelligent Homes for the Care of the Elderly. *J Intell Robot Syst*  
24 2014;**76**:57–71. doi:10.1007/s10846-013-0019-0  
25  
26  
27 29 Werner K, Oberzaucher J, Werner F. Evaluation of Human Robot Interaction Factors of a  
28 Socially Assistive Robot Together with Older People. In: *2012 Sixth International*  
29 *Conference on Complex, Intelligent, and Software Intensive Systems*. 2012. 455–60.  
30 doi:10.1109/CISIS.2012.36  
31  
32 30 Beuscher LM, Fan J, Sarkar N, *et al.* Socially Assistive Robots: Measuring Older Adults'  
33 Perceptions. *J Gerontol Nurs* 2017;**43**:35–43. doi:10.3928/00989134-20170707-04  
34  
35  
36 31 Loi SM, Bennett A, Pearce M, *et al.* A pilot study exploring staff acceptability of a  
37 socially assistive robot in a residential care facility that accommodates people under 65  
38 years old. *International Psychogeriatrics* 2017;**30**:1075–80.  
39 doi:10.1017/S1041610217002617  
40  
41  
42 32 Khosla R, Nguyen K, Chu M-T. Human Robot Engagement and Acceptability in  
43 Residential Aged Care. *International Journal of Human-Computer Interaction*  
44 2017;**33**:510–22. doi:10.1080/10447318.2016.1275435  
45  
46  
47 33 Louie W-YG, McColl D, Nejat G. Acceptance and Attitudes Toward a Human-like  
48 Socially Assistive Robot by Older Adults. *Assistive Technology* 2014;**26**:140–50.  
49 doi:10.1080/10400435.2013.869703  
50  
51  
52 34 Piezzo C, Suzuki K. Feasibility Study of a Socially Assistive Humanoid Robot for  
53 Guiding Elderly Individuals during Walking. *Future Internet* 2017;**9**:30.  
54 doi:10.3390/fi9030030  
55  
56  
57  
58  
59  
60

- 1  
2  
3 35 Sabelli AM, Kanda T, Hagita N. A Conversational Robot in an Elderly Care Center: An  
4 Ethnographic Study. In: *Proceedings of the 6th International Conference on Human-*  
5 *robot Interaction*. New York, NY, USA: : ACM 2011. 37–44.  
6 doi:10.1145/1957656.1957669  
7  
8  
9 36 Higgins JPT, Altman DG, Gøtzsche PC, *et al*. The Cochrane Collaboration’s tool for  
10 assessing risk of bias in randomised trials. *BMJ* 2011;**343**:d5928. doi:10.1136/bmj.d5928  
11  
12 37 Heller RF, Verma A, Gemmell I, *et al*. Critical appraisal for public health: A new  
13 checklist. *Public Health* 2008;**122**:92–8. doi:10.1016/j.puhe.2007.04.012  
14  
15 38 Davis FD, Bagozzi RP, Warshaw PR. User Acceptance of Computer Technology: A  
16 Comparison of Two Theoretical Models. *Management Science* 1989;**35**:982–1003.  
17 doi:10.1287/mnsc.35.8.982  
18  
19 39 Heerink M, Kröse B, Evers V, *et al*. Assessing Acceptance of Assistive Social Agent  
20 Technology by Older Adults: the Almere Model. *Int J of Soc Robotics* 2010;**2**:361–75.  
21 doi:10.1007/s12369-010-0068-5  
22  
23 40 Glaser BG, Strauss AL. *Discovery of Grounded Theory: Strategies for Qualitative*  
24 *Research*. 1 edition. New Brunswick: : Aldine Transaction 2000.  
25  
26 41 Intrinsic Motivation Inventory (IMI) – selfdeterminationtheory.org.  
27 <https://selfdeterminationtheory.org/intrinsic-motivation-inventory/> (accessed 13 Sep  
28 2019).  
29  
30 42 Fan J, Bian D, Zheng Z, *et al*. A Robotic Coach Architecture for Elder Care (ROCARE)  
31 Based on Multi-User Engagement Models. *IEEE Transactions on Neural Systems and*  
32 *Rehabilitation Engineering* 2017;**25**:1153–63. doi:10.1109/TNSRE.2016.2608791  
33  
34 43 Sarabia M, Young N, Canavan K, *et al*. Assistive Robotic Technology to Combat Social  
35 Isolation in Acute Hospital Settings. *International Journal of Social Robotics*  
36 2018;**10**:607–20. doi:10.1007/s12369-017-0421-z  
37  
38 44 Vandemeulebroucke T, Dierckx de Casterlé B, Gastmans C. The use of care robots in  
39 aged care: A systematic review of argument-based ethics literature. *Arch Gerontol*  
40 *Geriatr* 2018;**74**:15–25. doi:10.1016/j.archger.2017.08.014  
41  
42 45 Chou Y, Wang SB, Lin Y. Long-term care and technological innovation: the application  
43 and policy development of care robots in Taiwan. *Journal of Asian Public Policy*  
44 2019;**12**:104–23. doi:10.1080/17516234.2018.1492315  
45  
46 46 Stahl BC, Coeckelbergh M. Ethics of healthcare robotics: Towards responsible research  
47 and innovation. *Robotics and Autonomous Systems* 2016;**86**:152–61.  
48 doi:10.1016/j.robot.2016.08.018  
49  
50 47 Mori M. The Uncanny Valley. *IEEE Robotics Automation Magazine* 2012;**19**:98–100.  
51 doi:10.1109/MRA.2012.2192811  
52  
53  
54  
55  
56  
57  
58  
59  
60

- 1  
2  
3 48 Barrett E, Murphy K, Mannion A, *et al.* Can Social Robots Help to Reduce Loneliness  
4 and Social Isolation in People with Dementia? A Delphi Survey. *Age Ageing*  
5 2017;**46**:iii13–59. doi:10.1093/ageing/afx144.114  
6  
7  
8 49 Health Education England. The Topol Review. Preparing the healthcare workforce to  
9 deliver the digital future. Secretary of State for Health and Social Care 2019.  
10 <https://topol.hee.nhs.uk/wp-content/uploads/HEE-Topol-Review-2019.pdf> (accessed 5  
11 Apr 2019).  
12  
13 50 Rogers EM. *Diffusion of innovations*. 4th ed. New York: : Free Press 1995.  
14  
15 51 Locsin RC. The Co-Existence of Technology and Caring in the Theory of Technological  
16 Competency as Caring in Nursing. *The Journal of Medical Investigation* 2017;**64**:160–4.  
17 doi:10.2152/jmi.64.160  
18  
19 52 M. King B, D. Barry C. “Caring Between” the Nurse, the One Nursed, and the Healthcare  
20 Robot: An Interpreted Nursing Situation Using the Barry, Gordon, King Framework.  
21 *International Journal for Human Caring* 2019;**23**:168–77. doi:10.20467/1091-  
22 5710.23.2.168  
23  
24 53 Papadopoulos I. *Culturally Competent Compassion*. Oxon: : Routledge 2018.  
25  
26 54 Lee HR, Riek LD. Reframing Assistive Robots to Promote Successful Aging. *ACM*  
27 *Trans Hum-Robot Interact* 2018;**7**:1–23. doi:10.1145/3203303  
28  
29  
30  
31  
32  
33  
34  
35  
36  
37  
38  
39  
40  
41  
42  
43  
44  
45  
46  
47  
48  
49  
50  
51  
52  
53  
54  
55  
56  
57  
58  
59  
60

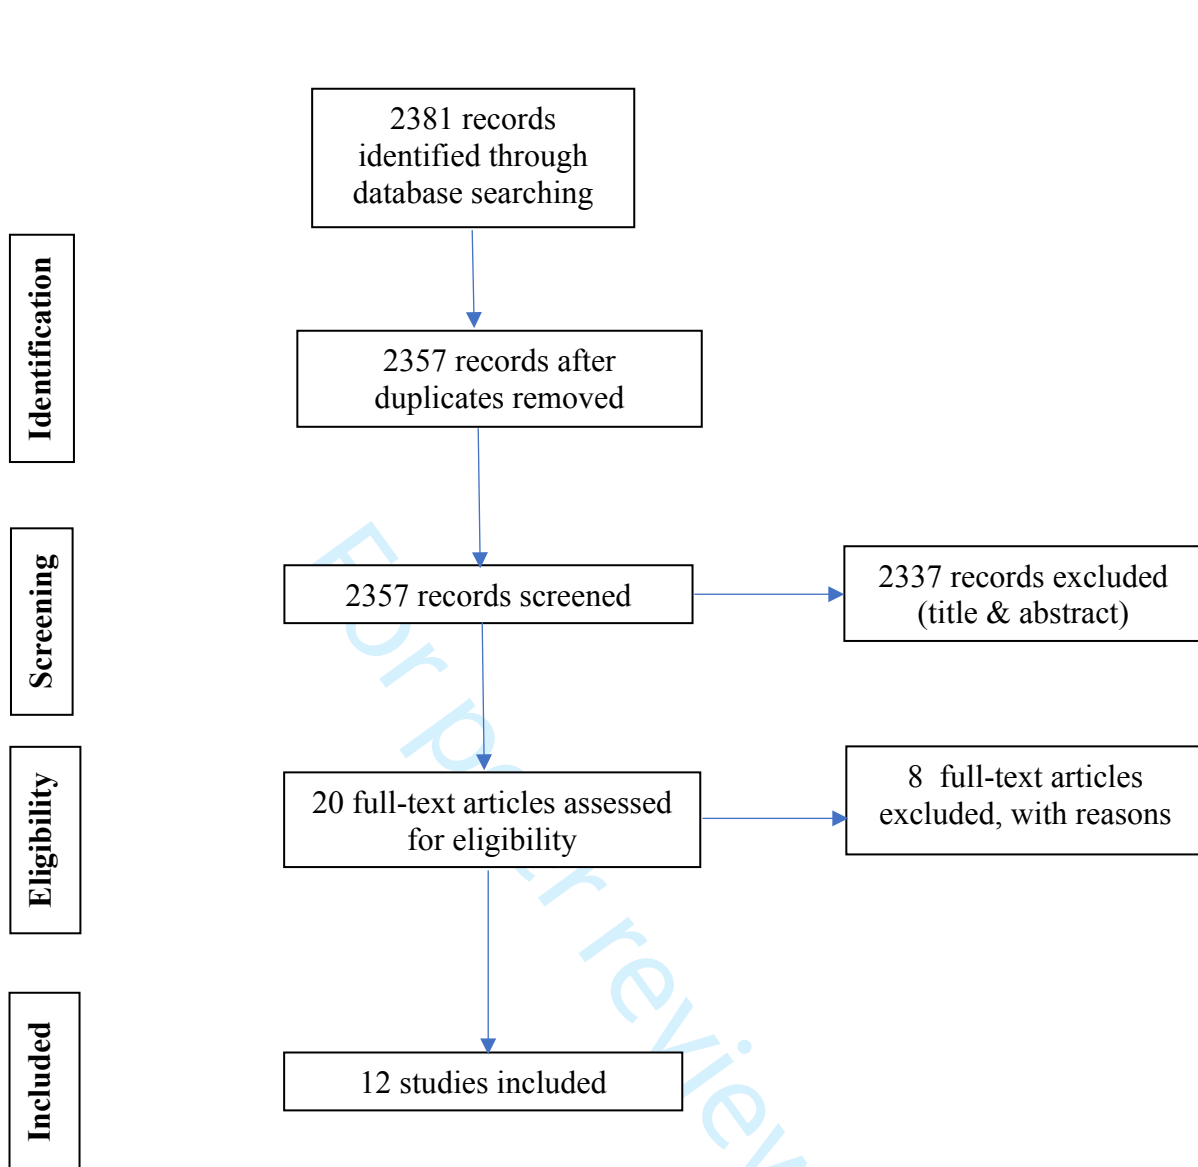

Figure 1. PRISMA flow chart



Figure 2. Summary of Results

For peer review only

1  
2  
3  
4  
5  
6  
7  
8  
9  
10  
11  
12  
13  
14  
15  
16  
17  
18  
19  
20  
21  
22  
23  
24  
25  
26  
27  
28  
29  
30  
31  
32  
33  
34  
35  
36  
37  
38  
39  
40  
41  
42  
43  
44  
45  
46  
47  
48  
49  
50  
51  
52  
53  
54  
55  
56  
57  
58  
59  
60

1  
2  
3 **DATA EXTRACTION TABLE**  
4

5 **Name of study:**

**Assessor**

7 **Interventions: dose/frequency/duration etc**

8 **Intervention**

10 **Comparator**

12 **Outcome measures according to us, of our review (not from authors of study)**

13 **1. Primary outcomes**

14 The identification of a comprehensive listing of enablers and barriers to the implementation of  
15 Socially Assistive Humanoid Robots (SAHR) in health and social care.

16 Barriers: those impeding the implementation of SAHR which may include factors, issues or themes at  
17 local, system or policy level.

18 Enablers: mechanisms and initiatives whereby patients' providers or policy makers contribute to  
19 facilitating the positive uptake and implementation of SAHR.

20 **2. Secondary outcomes**

21 The insights from these enablers and barriers and their impact.

22 Gaps and future developments to inform further research.

23 **Principal outcome measures: (from the authors in the study)**

24 a) ...

25 b) ...

26 c) ...

27 **What were the results of these outcome measures?**

28 **Measure a)**

|    | Pre | Post |                |
|----|-----|------|----------------|
| 1. |     |      | Fisher's exact |
| 2. |     |      |                |

31 **Measure b) and c)**

32 **Barriers**

33 **Enablers**

34 **Gaps and future developments**

35 **SUMMARY**

36 Identified Enablers from this study:

1. ...

2. ...

37 Identified Barriers:

1. ...

2. ...

38 **Conclusive remarks**

39 **Useful References**



# PRISMA 2009 Checklist

1  
2  
3  
4  
5  
6  
7  
8  
9  
10  
11  
12  
13  
14  
15  
16  
17  
18  
19  
20  
21  
22  
23  
24  
25  
26  
27  
28  
29  
30  
31  
32  
33  
34  
35  
36  
37  
38  
39  
40  
41  
42  
43  
44  
45  
46  
47

| Section/topic                      | #  | Checklist item                                                                                                                                                                                                                                                                                              | Reported on page # |
|------------------------------------|----|-------------------------------------------------------------------------------------------------------------------------------------------------------------------------------------------------------------------------------------------------------------------------------------------------------------|--------------------|
| <b>TITLE</b>                       |    |                                                                                                                                                                                                                                                                                                             |                    |
| Title                              | 1  | Identify the report as a systematic review, meta-analysis, or both.                                                                                                                                                                                                                                         | 1                  |
| <b>ABSTRACT</b>                    |    |                                                                                                                                                                                                                                                                                                             |                    |
| Structured summary                 | 2  | Provide a structured summary including, as applicable: background; objectives; data sources; study eligibility criteria, participants, and interventions; study appraisal and synthesis methods; results; limitations; conclusions and implications of key findings; systematic review registration number. | 2                  |
| <b>INTRODUCTION</b>                |    |                                                                                                                                                                                                                                                                                                             |                    |
| Rationale                          | 3  | Describe the rationale for the review in the context of what is already known.                                                                                                                                                                                                                              | 4-6                |
| Objectives                         | 4  | Provide an explicit statement of questions being addressed with reference to participants, interventions, comparisons, outcomes, and study design (PICOS).                                                                                                                                                  | 6                  |
| <b>METHODS</b>                     |    |                                                                                                                                                                                                                                                                                                             |                    |
| Protocol and registration          | 5  | Indicate if a review protocol exists, if and where it can be accessed (e.g., Web address), and, if available, provide registration information including registration number.                                                                                                                               | 2, 9               |
| Eligibility criteria               | 6  | Specify study characteristics (e.g., PICOS, length of follow-up) and report characteristics (e.g., years considered, language, publication status) used as criteria for eligibility, giving rationale.                                                                                                      | 8                  |
| Information sources                | 7  | Describe all information sources (e.g., databases with dates of coverage, contact with study authors to identify additional studies) in the search and date last searched.                                                                                                                                  | 6-7                |
| Search                             | 8  | Present full electronic search strategy for at least one database, including any limits used, such that it could be repeated.                                                                                                                                                                               | 6-7, and Table 1   |
| Study selection                    | 9  | State the process for selecting studies (i.e., screening, eligibility, included in systematic review, and, if applicable, included in the meta-analysis).                                                                                                                                                   | 8                  |
| Data collection process            | 10 | Describe method of data extraction from reports (e.g., piloted forms, independently, in duplicate) and any processes for obtaining and confirming data from investigators.                                                                                                                                  | 9                  |
| Data items                         | 11 | List and define all variables for which data were sought (e.g., PICOS, funding sources) and any assumptions and simplifications made.                                                                                                                                                                       | 9                  |
| Risk of bias in individual studies | 12 | Describe methods used for assessing risk of bias of individual studies (including specification of whether this was done at the study or outcome level), and how this information is to be used in any data synthesis.                                                                                      | 9, 10-12 (Table 2) |
| Summary measures                   | 13 | State the principal summary measures (e.g., risk ratio, difference in means).                                                                                                                                                                                                                               | n/a                |
| Synthesis of results               | 14 | Describe the methods of handling data and combining results of studies, if done, including measures of consistency (e.g., $I^2$ ) for each meta-analysis.                                                                                                                                                   | 8-9                |

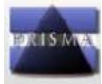

# PRISMA 2009 Checklist

Page 1 of 2

| Section/topic                 | #  | Checklist item                                                                                                                                                                                           | Reported on page #       |
|-------------------------------|----|----------------------------------------------------------------------------------------------------------------------------------------------------------------------------------------------------------|--------------------------|
| Risk of bias across studies   | 15 | Specify any assessment of risk of bias that may affect the cumulative evidence (e.g., publication bias, selective reporting within studies).                                                             | n/a                      |
| Additional analyses           | 16 | Describe methods of additional analyses (e.g., sensitivity or subgroup analyses, meta-regression), if done, indicating which were pre-specified.                                                         | n/a                      |
| <b>RESULTS</b>                |    |                                                                                                                                                                                                          |                          |
| Study selection               | 17 | Give numbers of studies screened, assessed for eligibility, and included in the review, with reasons for exclusions at each stage, ideally with a flow diagram.                                          | 9, and Figure 1 (Prisma) |
| Study characteristics         | 18 | For each study, present characteristics for which data were extracted (e.g., study size, PICOS, follow-up period) and provide the citations.                                                             | 14-20, including Table 3 |
| Risk of bias within studies   | 19 | Present data on risk of bias of each study and, if available, any outcome level assessment (see item 12).                                                                                                | 10-13, including Table 2 |
| Results of individual studies | 20 | For all outcomes considered (benefits or harms), present, for each study: (a) simple summary data for each intervention group (b) effect estimates and confidence intervals, ideally with a forest plot. | 15-19 (Table 3)          |
| Synthesis of results          | 21 | Present results of each meta-analysis done, including confidence intervals and measures of consistency.                                                                                                  | 18-24                    |
| Risk of bias across studies   | 22 | Present results of any assessment of risk of bias across studies (see Item 15).                                                                                                                          | n/a                      |
| Additional analysis           | 23 | Give results of additional analyses, if done (e.g., sensitivity or subgroup analyses, meta-regression [see Item 16]).                                                                                    | n/a                      |
| <b>DISCUSSION</b>             |    |                                                                                                                                                                                                          |                          |
| Summary of evidence           | 24 | Summarize the main findings including the strength of evidence for each main outcome; consider their relevance to key groups (e.g., healthcare providers, users, and policy makers).                     | 25-28                    |
| Limitations                   | 25 | Discuss limitations at study and outcome level (e.g., risk of bias), and at review-level (e.g., incomplete retrieval of identified research, reporting bias).                                            | 28-29                    |
| Conclusions                   | 26 | Provide a general interpretation of the results in the context of other evidence, and implications for future research.                                                                                  | 29                       |
| <b>FUNDING</b>                |    |                                                                                                                                                                                                          |                          |
| Funding                       | 27 | Describe sources of funding for the systematic review and other support (e.g., supply of data); role of funders for the systematic review.                                                               | 30                       |



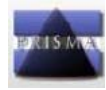

# PRISMA 2009 Checklist

- 1
- 2
- 3
- 4
- 5
- 6
- 7
- 8
- 9
- 10
- 11
- 12
- 13
- 14
- 15
- 16
- 17
- 18
- 19
- 20
- 21
- 22
- 23
- 24
- 25
- 26
- 27
- 28
- 29
- 30
- 31
- 32
- 33
- 34
- 35
- 36
- 37
- 38
- 39
- 40
- 41
- 42
- 43
- 44
- 45
- 46
- 47

*From:* Moher D, Liberati A, Tetzlaff J, Altman DG, The PRISMA Group (2009). Preferred Reporting Items for Systematic Reviews and Meta-Analyses: The PRISMA Statement. PLoS Med 6(7): e1000097. doi:10.1371/journal.pmed1000097. *For more information, visit:* [www.prisma-statement.org](http://www.prisma-statement.org).

For peer review only

# BMJ Open

## A systematic review of enablers and barriers to the implementation of Socially Assistive Humanoid Robots in health and social care

|                                 |                                                                                                                                                                                                                                                                                                                                                                                                                 |
|---------------------------------|-----------------------------------------------------------------------------------------------------------------------------------------------------------------------------------------------------------------------------------------------------------------------------------------------------------------------------------------------------------------------------------------------------------------|
| Journal:                        | <i>BMJ Open</i>                                                                                                                                                                                                                                                                                                                                                                                                 |
| Manuscript ID                   | bmjopen-2019-033096.R2                                                                                                                                                                                                                                                                                                                                                                                          |
| Article Type:                   | Original research                                                                                                                                                                                                                                                                                                                                                                                               |
| Date Submitted by the Author:   | 25-Nov-2019                                                                                                                                                                                                                                                                                                                                                                                                     |
| Complete List of Authors:       | Papadopoulos, Rena; Middlesex University, Research Centre for Transcultural Studies in Health<br>Koulouglioti, Christina; Middlesex University, Research Centre for Transcultural Studies in Health; Western Sussex Hospitals NHS Foundation Trust, Research and Innovation<br>lazzarino, runa; Middlesex University,<br>Ali, Sheila; Middlesex University, Research Centre for Transcultural Studies in Health |
| <b>Primary Subject Heading</b>: | Geriatric medicine                                                                                                                                                                                                                                                                                                                                                                                              |
| Secondary Subject Heading:      | Geriatric medicine                                                                                                                                                                                                                                                                                                                                                                                              |
| Keywords:                       | Socially assistive humanoid robots, artificial intelligence, health and social care, older adults, systematic review                                                                                                                                                                                                                                                                                            |
|                                 |                                                                                                                                                                                                                                                                                                                                                                                                                 |

SCHOLARONE™  
Manuscripts

**Article title**

A systematic review of enablers and barriers to the implementation of Socially Assistive Humanoid Robots in health and social care

**Authors information**

Professor Rena Papadopoulos PhD, RM, RN, FHEA (corresponding author),  
Head, Research Centre for Transcultural Studies in Health,  
Department of Mental Health and Social Work  
School of Health and Education,  
Middlesex University,  
The Burroughs,  
London NW4 4BT, UK.  
Tel: +44 208 411 6626  
Email: R.Papadopoulos@mdx.ac.uk  
ORCID: 0000-0001-6291-4332

Dr Christina Koulouglioti, PhD, RN  
Research Centre for Transcultural Studies in Health, Middlesex University, London, UK, and  
Research and Innovation Department, Western Sussex Hospitals NHS Foundation Trust,  
Worthing, UK  
ORCID: 0000-0003-3227-6696

Dr Runa Lazzarino, PhD  
Research Centre for Transcultural Studies in Health, Middlesex University, London, UK  
ORCID: 0000-0002-4206-4913

Sheila Ali, MSc  
Research Centre for Transcultural Studies in Health, Middlesex University, London, UK  
ORCID: 0000-0002-2614-0867

**Keywords**

Socially assistive humanoid robots, health and social care, older adults, artificial intelligence, systematic review

**Word Count**

5,374

## Abstract

**Objectives:** Socially assistive humanoid robots are considered a promising technology to tackle the challenges in health and social care posed by the growth of the ageing population. The purpose of our study was to explore the current evidence on barriers and enablers for the implementation of humanoid robots in health and social care.

**Design:** Systematic review of studies entailing hands-on interactions with a humanoid robot

**Setting:** From April 2018 to June 2018, databases were searched using a combination of the same search terms for articles published during the last decade. Data collection was conducted by using the *Rayyan* software, a standardised predefined grid, and a risk of bias and a quality assessment tool.

**Participants:** Post-experimental data were collected and analysed for a total of 420 participants. Participants comprised: older adults (n=307) aged  $\geq 60$  years, with no or some degree of age-related cognitive impairment, residing either in residential care facilities or at their home; care home staff (n=106); and informal caregivers (n=7).

**Primary outcomes:** Identification of enablers and barriers to the implementation of socially assistive humanoid robots in health and social care, and consequent insights and impact. Future developments to inform further research.

**Results:** Twelve studies met the eligibility criteria and were included. None of the selected studies had an experimental design, hence overall quality was low with high risks of biases. Several studies had no comparator, no baseline, small samples, and self-reported measures only. Within this limited evidence base, the enablers found were enjoyment, usability, personalisation, and familiarisation. Barriers were related to technical problems, to the robots' limited capabilities, and the negative preconceptions towards the use of robots in healthcare. Factors which produced mixed results were the robot's human-like attributes, previous experience with technology, and views of formal and informal carers.

**Conclusions:** The available evidence related to implementation factors of socially assistive humanoid robots for older adults is limited, mainly focusing on aspects at individual level, and exploring acceptance of this technology. Investigation of elements linked to the environment, organisation, societal and cultural milieu, policy and legal framework is necessary.

**Protocol registration:** Prospero CRD42018092866.

## Strengths and limitations of this study

- This review is the first to date focusing on the issues related to the pragmatic implementation of socially assistive humanoid robots in health and social care settings catering to the needs of older adults.
- Quality assessment of the included studies was based on two combined tools to account for the heterogeneity of the underlying study designs.
- Three authors were involved in critical steps of the review (article selection, data extraction, quality assessment of the included studies), and this constitutes a strength of the study.
- The heterogeneity between studies on key issues, such as participants' cognitive health and residential context, study designs and outcomes, prevents quantitative synthesis and hampers consistent assessment of the implementation of socially assistive humanoid robots in health and social care.

er review only

## INTRODUCTION

### Rationale

The current global landscape in health and social care is highly challenging, demanding innovative and effective actions from policy makers and service providers. For example, it is projected that by 2050 the world's population over the age of 60 years will be about two billion, an increase of 900 million from 2015. [1] Shortages of health care professionals and a growing ageing population place enormous pressures onto the health and social care systems of many countries. Older adults are living longer with chronic problems and/or disabilities.

At the same time, the size of formal and informal healthcare workforce is shrinking.

The use of artificial intelligence (AI) and robotics provides a major opportunity towards meeting some of the care needs of older adults. [2,3] An advanced form of AI is the one used in Socially Assistive Humanoid Robots (SAHRs). These robots use gestures, speech, facial recognition, movements, and, in general, social interaction to assist their users. [4] The robot's goal is to create close and effective interaction with the human user for the purpose of giving assistance and achieving measurable progress in convalescence, rehabilitation, learning, and well-being.

In a systematic review of the literature about the use of different available technologies directed to assist older adults, robotic devices and robots were viewed as an encouraging technology that can assist and prolong older adults' independent living. [5] Corroborating this finding, a few additional reviews of the literature have indicated that: (i) SAHRs could have multiple roles in the care of older adults, such as in affective therapy and cognitive training [6] and (ii) they could be beneficial in reducing anxiety, agitation, loneliness, and improving

1  
2  
3 quality of life, engagement, and interaction (especially when used as a therapeutic tool when  
4 caring for patients with dementia). [7–9] In addition, reviews related to the acceptance of  
5 robots have found it being influenced by numerous factors, such as the perceived need for the  
6 technology, the user's previous experiences with it, age, level of education, expectations  
7 about what the technology can do, attitudes, and cultural background; [10] in fact, robots that  
8 were programmed to use verbal and non-verbal communication familiar to the user and to  
9 their cultural background were more easily accepted by users. [11] Furthermore, a review of  
10 qualitative studies on older adults' experiences with socially assistive robots revealed the  
11 complexity of issues associated with their use with older adults, and how these impacted on  
12 their attitudes towards robots. [12] For example, issues related to the 'role' that the robot  
13 could acquire and to the nature of the Human-Robot Interaction (HRI) revealed a mixture of  
14 opinions and emotions. Parallel enquires among health and social care professionals have  
15 identified various areas where humanoid and animal-like robots can be helpful, but reported  
16 mixed views about their use in health care settings, raising issues of staff and patients' safety,  
17 and the protection of their privacy. [13] On a similar note, a recent qualitative exploration  
18 among different stakeholders in the healthcare context revealed that ethical and legal  
19 challenges, the lack of interests from professionals and patients, and concerns related to the  
20 robot's appearance and robotic expectations were major barriers to their potential use. [14]  
21 Frennert *et al's* review [15] focused mainly on concerns that need attention when considering  
22 the social robots and older adults interface, and urged developers to adopt a more pragmatic  
23 and realistic idea of an older adult. Their recommendations addressed the inclusion of older  
24 adults in the development process, without considering them incapable of expressing their  
25 needs and offering possible solutions to their own problems.

26  
27  
28  
29  
30  
31  
32  
33  
34  
35  
36  
37  
38  
39  
40  
41  
42  
43  
44  
45  
46  
47  
48  
49  
50  
51  
52  
53  
54  
55  
56  
57 All current reviews shed some light on certain aspects of this complicated relationship: older  
58  
59  
60

1  
2  
3 adults and socially assistive robots. However, in order to effectively meet the care needs of an  
4  
5 ageing population, it is imperative to identify and disseminate the full range of evidence-  
6  
7 based information of this form of technology. Such evidence will enable people to discuss the  
8  
9 possible solutions offered by SAHRs, in a more measured and informed way. This is  
10  
11 particularly important in our days, since public attitudes towards robots may be also  
12  
13 influenced by the media, often in negative ways. As an instance, while the use of robots will  
14  
15 undeniably change the workforce, many people believe that these changes will only be  
16  
17 negative. Example of catastrophic depictions of the use of AI in health and social care are  
18  
19 that robots will take over human professionals' jobs, that robots will be dangerous, or that  
20  
21 they are incapable of providing care that is culturally appropriate and compassionate. [16–19]  
22  
23 In fact, the McKinsey Global Institute, along with a recent analysis led by  
24  
25 PricewaterhouseCoopers, revealed that 'smart automation' that uses AI and robotics will be  
26  
27 disruptive for many industries, yet some industries will be affected more than others. For  
28  
29 example, in transportation and financial industries many low skills jobs that require repetitive  
30  
31 tasks will be heavily affected. On the other hand, the healthcare sector will either be affected  
32  
33 in the same magnitude or in a similar way.[20] Overall it is estimated that about 75 million to  
34  
35 375 million workers will have to change their occupation by 2030. [21] In the US, employees  
36  
37 in manufacturing, retail, and accounting appeared more worried that AI would impact their  
38  
39 jobs, whereas teachers, doctors, and nurses were less so. [22] The Topol Review – that  
40  
41 focuses on how the UK National Health Service (NHS) needs to prepare for the digital  
42  
43 revolution –projects that, over the next 20 years, 90% of all NHS jobs will require the  
44  
45 handling of data and the need for some digital skills. [23] The healthcare workforce will need  
46  
47 to be educated in digital literacy according to their professional role, and new roles will be  
48  
49 created as well. Similarly, in other industries is projected that AI requires very specialised  
50  
51 skills, and therefore the need for new technical jobs will increase in order to use robots in  
52  
53  
54  
55  
56  
57  
58  
59  
60



1  
2  
3 practice.[22,24] However, at least in the healthcare sector, nurses and other health  
4  
5 professionals are seen working along with robots. [25] It is estimated that about 8% to 16%  
6  
7 of nursing time is consumed on a variety of non-nursing tasks that could be delegated. [26]  
8  
9 Using robots for such tasks could free nurses' time to be spent in patient care.  
10  
11  
12

### 13 **Objective**

14  
15  
16  
17 Our review aims to understand what the current enablers and barriers to the use and  
18  
19 implementation of SAHRs are, and concentrates on articles that describe the actual use of  
20  
21 socially assistive humanoid robots among older adults. The primary focus is on exploring and  
22  
23 identifying the factors that might facilitate or hinder the implementation of SAHRs in health  
24  
25 and social care for older adults.  
26  
27  
28  
29

## 30 **METHODS**

### 31 **Information sources and search strategies**

32  
33  
34 The search strategy was developed for MEDLINE with appropriate modifications to match  
35  
36 the terminology used in other databases. Databases were searched between 9<sup>th</sup> April 2018 and  
37  
38 8<sup>th</sup> June 2018. In view of the recent adoption of this form of technology, we limited the  
39  
40 search date to the previous ten years. Subject headings and free text terms were used  
41  
42 according to the specific requirements of each database. Table 1 presents full search strategy  
43  
44 with search terms across the following bibliographic electronic databases: the Cochrane  
45  
46 Central Register of Controlled Trials (CENTRAL); 2017 MEDLINE via OVID; Embase via  
47  
48 OVID; Science Citation Index; CINAHL (Cumulative Index to Nursing and Allied Health  
49  
50 Literature); LILACS (Latin American and Caribbean Health Sciences Information database);  
51  
52 IEEE Xplore digital library; PsycINFO; Google Scholar; European Commission and  
53  
54  
55  
56  
57  
58  
59  
60

1  
2  
3 Eurobarometer. We also conducted the following additional searches: ACM Digital Library,  
4  
5 Computer Source Lecture Notes in Computer Science; Science Direct. In addition to  
6  
7 traditional searching, reverse citation screenings of the reference lists of relevant articles (ie,  
8  
9 including the key terms such as socially assistive humanoid robots and home care) and  
10  
11 forward citations (articles which have cited the identified papers) were conducted. The  
12  
13 references of eligible reports and key review articles were examined for other potentially  
14  
15 relevant studies.  
16  
17  
18  
19  
20  
21  
22

---

23 **Table 1.** Core set of search terms

---

24 "socially assistive robot\*" OR "socially assist\*" OR "social assist\*" AND robot\*

25  
26 AND "social care" OR "home care services" OR "home care" OR "care home\*"OR  
27 "nursing home\*" OR "residential facilit\*" OR "assisted living facilit\*" OR "group home\*" OR  
28 "home\* for the aged" OR "community health services" OR "self-help devices" OR  
29 self\* AND care\* AND management AND help OR "social support" OR "interpersonal  
30 relations" OR "nursing care" OR "point of care" OR "aged care" OR "activities of daily  
31 living" OR care\* OR healthcare OR social\*  
32  
33

34 NOT Animals NOT Infant OR Child\* OR pediatri\* OR paediatr\*  
35  
36  
37

---

38  
39  
40  
41 All records were uploaded into Rayyan software, a systematic review software, similar to  
42  
43 Covidence, [27] for managing citations for title and abstract screening and study  
44  
45 selection.[28] The software was used for the process of de-duplicating, and independently  
46  
47 exploring, screening abstracts and full texts, excluding and including studies based on pre-  
48  
49 specified criteria. Any disagreements regarding eligibility were discussed, and, if required, a  
50  
51 third researcher was consulted, and consensus reached. Figure 1 summarises the selection of  
52  
53 studies in accordance with PRISMA guidelines. [29]  
54  
55  
56  
57  
58  
59  
60

## Selection criteria

Studies that considered the application of socially assistive humanoid robots only (ie, not animal-like robots) in health and social care were included. These were not restricted to experimental designs (Table 2). In view of the likelihood of a paucity of potentially eligible studies relevant to this clinical topic, we also considered observational, cohort, case-control, and qualitative studies. Editorials, conference abstracts, and opinion pieces were excluded. Only adult and older adult care settings were included (eg, long term, rehabilitation, inpatient and outpatient hospital care, community, and social care). The target population covered all stakeholders who were part of the process of implementation of SAHRs in health and social care in the broadest perspective (eg, users, staff, caregivers), and it was not limited to the aged population. Studies that included any type of direct exposure to SAHRs were selected.

## Data extraction and synthesis of the results

Study details and outcome data were collected independently by two researchers with a piloted data extraction form (see Supplementary File 1). The process was validated by assessing the data extraction form on a small number of studies ( $n = 4$ ) that two researchers assessed independently and compared. Type of study/design, date of publication, country and specific setting (ie, care facility), intervention (ie, type of SAHR), sample and characteristics of participants, and primary outcomes were identified (Table 3). Primary outcomes entailed the identification of enablers and barriers to the implementation of SAHRs in health and social care. Barriers were defined as those impeding the implementation of SAHRs which may include factors, issues, or themes at local, system, or policy level. Enablers were defined as mechanisms and initiatives whereby patients, providers, or policy makers contribute to facilitating the positive uptake and implementation of a SAHR.

1  
2  
3 The heterogeneity of the studies included in this review did not enable a standard quantitative  
4 synthesis (ie, meta-analysis) to be performed. Instead, a narrative synthesis of the results was  
5 conducted and presented in the form of a summary table (Table 3) and figure (Figure 2). All  
6 results were discussed and weighted by three researchers with the aim of identifying a  
7 frequency-based ranking of importance in relation to enablers, barriers, and mixed  
8 results. Any uncertainties were resolved via a consensus-based decision. The protocol for this  
9 systematic review has been registered and published on PROSPERO (ID:  
10 CRD42018092866). Ethics approval was not required for this research.  
11  
12  
13  
14  
15  
16  
17  
18  
19  
20  
21  
22

## 23 RESULTS

### 24 Search results and included studies

25  
26 A total of twelve studies were included in our analyses: six mixed-method, non-randomised  
27 user experience trials; [30–35] two pre-post experimental surveys; [36,37] one mixed-  
28 method, longitudinal experience trial; [38] two post-experimental surveys; [39,40] and one  
29 ethnographic study. [41] (Figure 1. PRISMA Flow Chart).  
30  
31  
32  
33  
34  
35  
36  
37  
38  
39

### 40 Assessment of risk of bias and quality of included studies

41  
42 The quality of studies was assessed for all included studies with the following two  
43 assessments tools: the Cochrane Collaboration's tool for assessing risk of bias [42] and the  
44 Critical Appraisal for Public Health [43] (Table 2). The research team decided that two  
45 researchers independently assessed four (ie, 1/3) of included studies and compared their  
46 results in order to ensure the validity and reliability of the process. Disagreements were  
47 resolved via the involvement of a third member of the research team and group discussions.  
48  
49  
50  
51  
52  
53  
54  
55  
56  
57  
58  
59  
60

1  
2  
3 None of the selected studies had an experimental design, hence overall quality was low with  
4 high risks of biases (Table 2). Most studies had no comparator and no baseline. [30–  
5 35,38,40,41] Additional methodological limitations affecting the non-randomised, quasi-  
6 experimental design of the studies were: very small samples' sizes, with only one study  
7 involving more than 100 participants; [38] and self-reported measures, [30,34–37,39,40] not  
8 always in combination with observation and/or data retrieved from the robot. [31–33,38]  
9  
10 Seven studies [33–35,37,38,40,41] used validated instruments informed by existing  
11 theoretical models; [44–47] two studies reported the drop-out rate but did not mention the  
12 handling of missing data. [32,37] Three studies did not report any information on ethical  
13 approvals or consent received from the participants. [31,38,39] Protocols, trial pre-  
14 registration, and fidelity checks were not found in any of the studies. Four studies reported no  
15 information about funding. [33,35,38,40]  
16  
17  
18  
19  
20  
21  
22  
23  
24  
25  
26  
27  
28  
29  
30  
31  
32  
33  
34  
35  
36  
37  
38  
39  
40  
41  
42  
43  
44  
45  
46  
47  
48  
49  
50  
51  
52  
53  
54  
55  
56  
57  
58  
59  
60

**Table 2.** Risk of bias and quality assessment of included studies

| Authors<br>Year             | Selection Bias<br>Random<br>Sequence<br>Generation <sup>i</sup> | Allocation<br>Concealment | Performance<br>Bias<br>Blinding of<br>Participants and<br>Personnel | Detection Bias<br>Blinding of<br>Outcome<br>Assessment | Attrition<br>Bias<br>Incomplete<br>Outcome<br>Data | Reporting<br>Bias<br>Selective<br>Reporting | Other Bias<br>and Limitations <sup>ii</sup>                                                                                                               |
|-----------------------------|-----------------------------------------------------------------|---------------------------|---------------------------------------------------------------------|--------------------------------------------------------|----------------------------------------------------|---------------------------------------------|-----------------------------------------------------------------------------------------------------------------------------------------------------------|
| 1 Bedaf et al.<br>(2017)    | –                                                               | –                         | –                                                                   | –                                                      | –                                                  | –                                           | Self-reported measures; no fidelity checks reported; small sample; gender imbalance; two-time interaction; not real home                                  |
| 2 Beuscher et al. (2017)    | –                                                               | –                         | –                                                                   | –                                                      | –                                                  | –                                           | Self-reported measures; self-selected, very small, and WEIRD <sup>iii</sup> sample; no fidelity checks reported; SAHR small in size; one-time interaction |
| 3 Caleb-Solly et al. (2018) | –                                                               | –                         | –                                                                   | –                                                      | –                                                  | –                                           | Not clear statistics; sampling unclear; small sample; no ethics reported; no fidelity checks reported                                                     |
| 4 Hebesberger et al. (2017) | –                                                               | –                         | –                                                                   | –                                                      | –                                                  | –                                           | Sampling unclear; small sample; lack of validity of both qualitative and quantitative measures; low return on missing data                                |

1  
2  
3  
4  
5  
6  
7  
8  
9  
10  
11  
12  
13  
14  
15  
16  
17  
18  
19  
20  
21  
22  
23  
24  
25  
26  
27  
28  
29  
30  
31  
32  
33  
34  
35  
36  
37  
38  
39  
40  
41  
42  
43  
44  
45  
46

| Authors Year            | Selection Bias<br>Random Sequence Generation | Allocation Concealment | Performance Bias<br>Blinding of Participants and Personnel | Detection Bias<br>Blinding of Outcome Assessment | Attrition Bias<br>Incomplete Outcome Data | Reporting Bias<br>Selective Reporting | Other Bias and Limitations                                                                                                                                         |
|-------------------------|----------------------------------------------|------------------------|------------------------------------------------------------|--------------------------------------------------|-------------------------------------------|---------------------------------------|--------------------------------------------------------------------------------------------------------------------------------------------------------------------|
| 5 Khosla et al. (2017)  | -                                            | -                      | -                                                          | -                                                | -                                         | +                                     | Not same cohort and not same RCF throughout the study; no fidelity checks reported; no ethics reported                                                             |
| 6 Loi et al. (2017)     | -                                            | -                      | -                                                          | -                                                | -                                         | -                                     | Self-reported measures; very small sample; low response rate; one-group design; large drop out at follow up; exposure poorly measured; no fidelity checks reported |
| 7 Louie et al. (2014)   | -                                            | -                      | -                                                          | -                                                | -                                         | +                                     | Self-reported measures; sampling unclear; small, gender-imbalanced sample; low response rate; no ethics reported                                                   |
| 8 Piezzo et al. (2017)  | -                                            | -                      | -                                                          | -                                                | +                                         | -                                     | Sampling unclear; very small sample; no baseline data; no fidelity check; ethical approval not reported (only informed consent)                                    |
| 9 Sabelli et al. (2011) | -                                            | -                      | -                                                          | -                                                | -                                         | -                                     | Qualitative study; no comparator; no baseline; no confounders considered                                                                                           |

For peer review only

| Authors<br>Year            | Selection Bias<br>Random<br>Sequence<br>Generation | Allocation<br>Concealment | Performance<br>Bias<br>Blinding of<br>Participants and<br>Personnel | Detection Bias<br>Blinding of<br>Outcome<br>Assessment | Attrition<br>Bias<br>Incomplete<br>Outcome<br>Data | Reporting<br>Bias<br>Selective<br>Reporting | Other Bias<br>and Limitations                                                                                                                                 |
|----------------------------|----------------------------------------------------|---------------------------|---------------------------------------------------------------------|--------------------------------------------------------|----------------------------------------------------|---------------------------------------------|---------------------------------------------------------------------------------------------------------------------------------------------------------------|
| 10 Torta et al.<br>(2014)  | -                                                  | -                         | -                                                                   | -                                                      | -                                                  | -                                           | Self-reported measures; sampling unclear; small sample; low return on missing data; ethical approval not reported (only informed consent)                     |
| 11 Werner et al.<br>(2012) | -                                                  | -                         | -                                                                   | -                                                      | -                                                  | -                                           | Sampling unclear; small sample; no comparator; baseline data not reported; ethical approval not reported (only informed consent); no fidelity checks reported |
| 12 Wu et al.<br>(2014)     | -                                                  | -                         | -                                                                   | -                                                      | +                                                  | +                                           | Partly self-selected sample; no fidelity checks reported                                                                                                      |

+ = low risk of bias; - = high risk of bias

<sup>i</sup> None of the studies was an RCT, therefore no randomization was present. This also affects general quality of the studies, which overall were at high risk of all types of bias, with some exception in Attrition and Reporting bias only.

<sup>ii</sup> Incorporation of evaluations conducted with Critical Appraisal for Public Health Checklist (Heller et al. 2007).

<sup>iii</sup> WEIRD stands for Western Educate Industrialised Rich Democratic.



### Characteristics of selected studies

Table 3 presents characteristics and outcomes of the twelve included studies.

#### Population

Post-experimental data were collected and analysed for a total of 420 participants, including 73% of older adults ( $n=307$ ), 2% of informal carers (ie, older adults' children,  $n = 7$ ) and 31% of formal caregivers and staff ( $n = 106$ ). The cohort of participants in two of the selected studies was the same [34,35], however we resolved to count participants twice because aims, measures, and results of the two studies were different. In eleven of the twelve selected studies, participants were older adults aged  $\geq 60$ , with an overall mean age of 79.8 years.

Among these eleven studies, one also included professional and informal caregivers, [30] and two considered Residential Care Facility (RCF) staff as well. [32,41] One study only involved staff in a RCF for younger adults affected by neuropsychiatric conditions. [37] Three studies included older adults affected by dementia and other conditions of ageing-related, cognitive impairment. [31,32,38] One study compared older adults affected by Mild Cognitive Impairment (MCI) with a Cognitively Intact Healthy (CIH) group, [33] whereas another one did not compare the two groups. [36] Five studies selected CIH older adults, [30,34,35,40,41] whereas in another one participants' condition was not reported. [39] Since one study did not report the gender of the 55 older adults taking part in the study [41], out of 365 participants, 69% were female. Participants' level of education was only considered in three studies where over 80% of participants had at least a bachelor degree. [33,36,39]

**Table 3.** Summary table of included studies

|   | <b>Authors<br/>Year</b>   | <b>Aim</b>                                                             | <b>Participants and<br/>Sampling</b>                                                                                                                                                                                                                         | <b>Methodology and Data<br/>Collection</b>                                                                                                          | <b>Intervention</b>                                                                                                                                                       | <b>Findings related to enablers (E) and<br/>barriers (B)</b>                                                                                                                                                                                                                                                         |
|---|---------------------------|------------------------------------------------------------------------|--------------------------------------------------------------------------------------------------------------------------------------------------------------------------------------------------------------------------------------------------------------|-----------------------------------------------------------------------------------------------------------------------------------------------------|---------------------------------------------------------------------------------------------------------------------------------------------------------------------------|----------------------------------------------------------------------------------------------------------------------------------------------------------------------------------------------------------------------------------------------------------------------------------------------------------------------|
| 1 | Bedaf et al.<br>(2017)    | Capture the experience of living with a robot at home                  | Aged 60+ ( $\mu = 78.9$ ) participants living at home in the Netherlands, with no cognitive decline and receiving home care ( $n = 10$ ), informal caregivers ( $n = 7$ ), and professional caregivers ( $n = 11$ ).<br>Non-probability convenience sampling | Mixed-method, no comparator, no baseline. Questionnaire and semi-structured interviews                                                              | Care-O-bot 3. Two-part-scenario, highly structured user test administered twice to each participant (preceded by a practise session). Duration of user test session: 1.5h | <b>E:</b> previous experience with technology; enjoyable experience; support to prolong independent living; tailored care; enhanced intelligence and social skills<br><b>B:</b> technical problems; limited performance; lack of social interaction; arbitrary representations (e.g. changing colour of robot torso) |
| 2 | Beuscher et al.<br>(2017) | Determine impact of exposure to robots on perceptions and attitudes    | Age 65+ ( $\mu = 81.9$ ) participants with corrected vision and hearing that allowed them to engage in conversation with the SAHR, and physically able to participate in chair exercises ( $n = 19$ ). Non-probability convenience sampling                  | Pre-post intervention survey. No comparator. The 32-item acceptance scale which measured: performance expectancy, effort expectancy, and attitudes. | NAO. Two sets of HRI experiments in an engineering lab (USA). The first set comprised of robot to one older adult, the second of robot to two older adults                | <b>E:</b> familiarisation; higher education; enjoyable and engaging experience; easiness to understand SAHR; SAHR's pleasant appearance<br><b>B:</b> life-like appearance (1/3 liked it); not feeling comfortable during HRI                                                                                         |
| 3 | Caleb-Solly et al. (2018) | Identify usability and user experience issues and how to overcome them | Aged 60+ ( $\mu = 79$ ) group suffering from some ageing-related impairments but with                                                                                                                                                                        | Mixed-method, no comparator, no baseline. Questionnaire, structured interview, user experience                                                      | Kompaï ( <i>Molly</i> in the UK, <i>Max</i> and <i>Charley</i> in the Netherlands)                                                                                        | <b>E:</b> trust; familiarisation; cooperative interaction approach (co-learning self-training system); creative and engaging ways; use of Wizard; individualisation and contextualisation                                                                                                                            |

1  
2  
3  
4  
5  
6  
7  
8  
9  
10  
11  
12  
13  
14  
15  
16  
17  
18  
19  
20  
21  
22  
23  
24  
25  
26  
27  
28  
29  
30  
31  
32  
33  
34  
35  
36  
37  
38  
39  
40  
41  
42  
43  
44  
45  
46

| Authors<br>Year             | Aim                                                                                              | Participants and<br>Sampling                                                                                                                                                                                                         | Methodology and Data<br>Collection                                                                                                                                                              | Intervention                                                                                                                                                                                                                                                             | Findings related to enablers (E) and<br>barriers (B)                                                                                                                                                                                                                                       |
|-----------------------------|--------------------------------------------------------------------------------------------------|--------------------------------------------------------------------------------------------------------------------------------------------------------------------------------------------------------------------------------------|-------------------------------------------------------------------------------------------------------------------------------------------------------------------------------------------------|--------------------------------------------------------------------------------------------------------------------------------------------------------------------------------------------------------------------------------------------------------------------------|--------------------------------------------------------------------------------------------------------------------------------------------------------------------------------------------------------------------------------------------------------------------------------------------|
| 4 Hebesberger et al. (2017) | Investigate acceptance and experience of a long-term SAHR in a non-controlled, real-life setting | <p>stamina to participate in 2- to 3-hour studies over a 5- to 6-week period (<i>n</i> = 11). Non-probability convenience sampling</p> <p>Staff members caring for older adults affected by dementia in care-hospital (Austria).</p> | <p>analysis software, researchers' observations</p> <p>Mixed-method, no comparator, no baseline. Ten semi-structured interviews, live observations, and <i>n</i> = 70 online questionnaires</p> | <p>physical robotic unit. Exposure: orientation workshops, individual trials in assisted living studio, residential care home user experience trial, home apartment user experience trial.</p> <p>SCITOS robotic platform. 15-day-trial following a 5-day-pilot test</p> | <p><b>B:</b> technical problems</p> <p><b>E:</b> Mixed results on social acceptance; seen as a nice distraction, a novelty tool</p> <p><b>B:</b> technical problems; robot's lack of capabilities; negative views (robots v humans); fear with new technology and with making mistakes</p> |

|   | Authors<br>Year         | Aim                                                                     | Participants and<br>Sampling                                                                                                                                                                                                                  | Methodology and Data<br>Collection                                                                                                                                                                                                   | Intervention                                                                                                                                                                                      | Findings related to enablers (E) and<br>barriers (B)                                                                                                                                                                                                                                                                                                 |
|---|-------------------------|-------------------------------------------------------------------------|-----------------------------------------------------------------------------------------------------------------------------------------------------------------------------------------------------------------------------------------------|--------------------------------------------------------------------------------------------------------------------------------------------------------------------------------------------------------------------------------------|---------------------------------------------------------------------------------------------------------------------------------------------------------------------------------------------------|------------------------------------------------------------------------------------------------------------------------------------------------------------------------------------------------------------------------------------------------------------------------------------------------------------------------------------------------------|
| 5 | Khosla et al.<br>(2017) | Study engagement and acceptability of SAHR amongst people with dementia | Aged 65-90 ( $\mu = 77.5$ ) home care residents, with dementia and other conditions, living in residential care facilities in Australia ( $n = 115$ ). Total reactions coded and analysed: $n = 8,304$ . Non-probability convenience sampling | Mixed-method, longitudinal experience trial. Video coding following engagement measures (emotional, visual, behavioural, verbal) during trial. Post-trial survey (acceptability based on Technology Acceptance Model, TAM)           | Matilda robotic unit. Designed activities in Matilda relevant to social context in RCFs in Australia. Repeated three-stage, 4- to 6- hours long, field trials in four residential care facilities | <b>E:</b> services' personalisation (e.g. songs and lyrics, integrated with human-like emotive expressions) accounting for users' disabilities; human-like features; personalisation underpinned in concept of personhood<br><br><b>B:</b> technology barrier can be broken by accounting for the context of service, robot interface, and users.    |
| 6 | Loi et al.<br>(2017)    | Investigate SAHR acceptance and utilisation                             | Staff in a residential care facility for younger adults in Australia. Pre-questionnaire ( $n = 24$ ) Post-questionnaire ( $n = 8$ ). Non-probability convenience sampling                                                                     | Pre-post intervention survey. No comparator. TAM informed questionnaire with 6 statements pertaining to the staff themselves and 11 statements about the residents. Two post-questionnaire questions about the benefits and barriers | Betty. Two 1-hour long training /introductory sessions over 2 weeks. In addition, Betty spent 12 weeks at the residential care facility                                                           | <b>E:</b> individualisation; music; the enjoyment interacting with the robot, being comfortable with the robot, perceived usefulness that the robot will improve their daily life and well-being; Perceived beneficial for the patients<br><br><b>B:</b> excessive workload; negative assumptions on older residents' ICT skills; technical problems |
| 7 | Louie et al.<br>(2014)  | Explore acceptance and attitude toward human-like expressive SAHR       | $N = 54$ older adults from a senior association (in Canada) ( $\mu = 76.5$ ). Non-probability convenience sampling                                                                                                                            | Post-experimental survey. No comparator. TAM informed questionnaire of 18 items measuring 7 constructs ( $N = 46$ completed the                                                                                                      | Brian 2.1. One 1.5 hour-long live demonstration following person-centred behaviours guidelines                                                                                                    | <b>E:</b> human-like communication is preferred over human-like appearance; gender (the male robot is more appreciate by female user)<br><br><b>B:</b> Feeling anxious with new technology                                                                                                                                                           |

| Authors<br>Year               | Aim                                                                             | Participants and<br>Sampling                                                                                                                                                                         | Methodology and Data<br>Collection                                                                                                                        | Intervention                                                                                                                             | Findings related to enablers (E) and<br>barriers (B)                                                                                                                                                                                                                                                                                                                      |
|-------------------------------|---------------------------------------------------------------------------------|------------------------------------------------------------------------------------------------------------------------------------------------------------------------------------------------------|-----------------------------------------------------------------------------------------------------------------------------------------------------------|------------------------------------------------------------------------------------------------------------------------------------------|---------------------------------------------------------------------------------------------------------------------------------------------------------------------------------------------------------------------------------------------------------------------------------------------------------------------------------------------------------------------------|
| 8<br>Piezzo et al.<br>(2017)  | A feasibility study to assess the use of SAHR as a walking motivational partner | N = 8 older adults with no cognitive problems ( $\mu = 82.5$ ) visiting a facility that provides short-term care in Japan. Non-probability convenience sampling                                      | questionnaire, of which $n = 37$ female)<br>Post-experiment motivation questionnaire (Intrinsic Motivation Inventory)                                     | Pepper used as a motivational walking partner. Older adults were asked to walk a short distance once on their own and once with the SAHR | * No relationship between previous experience and ease to use<br><b>E:</b> personalised interaction; SAHR's encouragement and positive comments                                                                                                                                                                                                                           |
| 9<br>Sabelli et al.<br>(2011) | Unveil the experience of older adults and staff with a SAHR                     | N = 55 cognitive healthy older adults ( $\mu = 83.9$ ) visiting a elderly care centre in Japan either once or twice a week; $n = 8$ female staff members<br>Non-probability convenience sampling     | Qualitative study based on ethnography (semi-structured interviews, transcription of interaction, observations). Grounded theory used for data analysis.  | Robovie2 placed for 3.5 months in an elderly day care centre. Robot teleoperated to engage in greetings and conversations                | <b>E:</b> basic social interactions (ie, greetings and being called by name) sharing the routine; conversations about personal issues; SAHR's kindness and encouragement leading to positive emotions; attributed role as a child to the SAHR; staff positive attitudes and actions to favour HRI; Japanese culture<br><b>B:</b> SAHR's limited mobility and voice volume |
| 10<br>Torta et al.<br>(2014)  | Investigate SAHR acceptance                                                     | N = 16 older adults cognitively healthy and able to perform physical exercises in a sitting position ( $\mu = 77$ ), recruited from two senior citizen centres in Austria and Israel ICT savvy older | Repeated post-experimental survey. No comparator. Almere Model informed questionnaire. Repeated post-trial de-briefing interview for qualitative analysis | NAO as communication interface with KSERA smart home system. Short- and long-term field trials involving 5                               | <b>E:</b> small anthropomorphic shape (low anxiety); adaptability to user's needs/personalisation; constant verbal communication; familiarisation (ease of use and sociability)<br><b>B:</b> small anthropomorphic shape (low social presence); technical malfunctions; familiarisation (as enjoyment linked to novelty effect)                                           |

| Authors<br>Year               | Aim                                 | Participants and<br>Sampling                                                                                                                                                                                                                                                                       | Methodology and Data<br>Collection                                                                                                                                                                                                                                                | Intervention                                                                                                                                                                      | Findings related to enablers (E) and<br>barriers (B)                                                                                                                                                                                                                                                                                                                                                                                                                                                                                      |
|-------------------------------|-------------------------------------|----------------------------------------------------------------------------------------------------------------------------------------------------------------------------------------------------------------------------------------------------------------------------------------------------|-----------------------------------------------------------------------------------------------------------------------------------------------------------------------------------------------------------------------------------------------------------------------------------|-----------------------------------------------------------------------------------------------------------------------------------------------------------------------------------|-------------------------------------------------------------------------------------------------------------------------------------------------------------------------------------------------------------------------------------------------------------------------------------------------------------------------------------------------------------------------------------------------------------------------------------------------------------------------------------------------------------------------------------------|
| 11<br>Werner et al.<br>(2012) | Evaluate HRI and<br>user experience | adults excluded. Non-<br>probability<br>convenience sampling<br>N = 16 older adults,<br>cognitively healthy<br>and able to perform<br>basic physical exercise<br>( $\mu = 77$ ), recruited<br>from two senior citizen<br>centres in Austria and<br>Israel. Non-probability<br>convenience sampling | Post-test questionnaires<br>containing KSERA HRI-<br>Scale, the HRI Godspeed<br>questionnaire, and<br>questions regarding user<br>acceptance. Notes on users'<br>loud observations during<br>test cases. Pre-test PANAS<br>scales to evaluate<br>participants' emotional<br>state | scenarios, totalling<br>22 trial iterations<br><br>NAO as<br>communication<br>interface with<br>KSERA smart<br>home system.<br>Three test cases<br>demonstrated twice<br>to users | * No relationship between acceptance and<br>user's cultural background<br><b>E:</b> SAHR as motivator and helper; safety;<br>sympathy, friendliness, intelligence<br><br><b>B:</b> technical problems (eg, navigation and<br>speech recognition); limited performance<br>negatively affecting human-likeness (eg.,<br>movement, navigation, and conversational<br>abilities)                                                                                                                                                              |
| 12<br>Wu et al.<br>(2014)     | Investigate SAHR<br>acceptance      | Older adults ( $\mu = 79.3$ )<br>with MCI and no<br>impairment ( $n = 11$ ) in<br>France. Non-<br>probability<br>convenience sampling                                                                                                                                                              | Mixed-method. Healthy<br>group compared with group<br>with MCI. No baseline, no<br>treatment-as-usual<br>comparator. Usability-<br>performance measures,<br>TAM informed acceptance<br>questionnaire, semi-<br>structured interview, and<br>focus group                           | Kompaï.<br>Participants<br>interacted with<br>SAHR in the<br>Living Lab once a<br>week for 4 weeks.<br>Duration of<br>interaction: 1 hour                                         | <b>E:</b> usability and amusement; encouragement to<br>use from formal and informal carers<br>professionals; sense of discovery and being up<br>to date with technology; familiarisation<br><b>B:</b> uneasiness with technology; feeling of<br>stigmatization (i.e. dependency and decline);<br>ethical/societal issues associated with robot use<br>(i.e., fear of societal dehumanisation /changing<br>human nature and what it means to care).<br>* MCI may encounter more difficulties; HIC<br>tended to show less positive attitude |

1  
2  
3 Similarly, in the four studies where data were collected on general Information and  
4  
5 Communication Technology (ICT) skills, 76% ( $n = 66$ ) of 87 participants reported regular  
6  
7 computer use. [31,33,36,39] In other two studies [34,35], highly experienced technology  
8  
9 users were excluded, following assessment. In these two studies, information around previous  
10  
11 contact with a SAHR on behalf of research participants is not explicit. However, if we  
12  
13 assume that high ICT experience implies previous contact with a SAHR, none of the  
14  
15 participants across all the studies had had any hands-on experience with SAHRs before  
16  
17 taking part in the studies. The largest post-experimental group consisted in Australian  
18  
19 participants ( $n = 123$ ). All the above figures includes neither data of subjects who dropped  
20  
21 out in pre-post studies [37,39] nor all data collected via observation of HRIs or interviews, as  
22  
23 sometimes this information was irretrievable or not reported. [32]  
24  
25  
26  
27  
28  
29

### 30 Settings and Interventions

31  
32  
33 Four trials were carried out in RCFs, [32,37,38,41] six in smart environments or university  
34  
35 laboratories, [30,33–36,39] and two in a combination of private apartment, RCF, and  
36  
37 laboratory. [31,40] None of the studies was conducted in an acute healthcare setting. Studies  
38  
39 were conducted in the following countries: six in a European context (Austria, UK,  
40  
41 Netherlands, France); [30–35] and two of these six in Israel as well; [34,35] two in Australia;  
42  
43 [37,38] two in Japan; [40,41] one in Canada; [39] and one in the USA. [36]  
44  
45  
46  
47

48 All studies included interventions where participants had their first hands-on experience  
49  
50 interacting with a SAHR. Eight different types of SAHRs were used which had different  
51  
52 appearances, bodily movements' abilities, often an additional mode of interaction beyond  
53  
54 voice-based (ie, built-in touch screen, touch sensors, tablet remote control). All were  
55  
56 customised with software packages providing a range of specific services.  
57  
58  
59  
60

1  
2  
3 In most studies, a pilot field test was conducted to establish familiarization. Pilot testing was  
4 deemed necessary particularly in those experiments where participants had to interact with  
5 the SAHR in highly structured scenarios performing specific tasks, sometimes following  
6 instructions. [30,31,33–36,40] This type of HRI lasted between 45 minutes [30] and up to 6  
7 hours. [38] Three studies adopted a design whereby HRI was not structured, and RCFs  
8 residents and members of staff freely chose to interact with the SAHR. [32,37,41]  
9

10  
11  
12 The HRIs in the twelve exposures involved the following services and activities: playing  
13 cognitive games such as Bingo, Hoy, and general knowledge games, including an orientation  
14 game with the support of pictures, ‘21 questions’, and ‘Simon says’ game; [31,33,36–39]  
15 listening to music, singing, storytelling, relaxation, dancing (including joint chair exercise)  
16 and physical training (including walking); [34–38,40,48] carry and delivery tasks; [30,31]  
17 call to a friend, calendar and reminders, such as to drink water, to do exercise, to take  
18 medication; [30,31,33,34] weather information; [34,37] restaurant finding; [39] and  
19 reception, greetings, and interactions; [32,41] medical measurement. [35]  
20  
21  
22  
23  
24  
25  
26  
27  
28  
29  
30  
31  
32  
33  
34  
35  
36  
37

### 38 **Narrative synthesis**

39  
40 Findings in terms of enablers and barriers are presented below and summarised in Figure 2.  
41  
42

#### 43 Enablers

44  
45  
46  
47  
48 *Enjoyment.* An enjoyable experience was found to be a crucial factor conducive to SAHRs’  
49 use and implementation. In ten trials (83%) participants highly valued enjoyment and  
50 engagement when interacting with the SAHR, both in terms of general positive HRI  
51 experience (eg, SAHR’s kindness, friendliness, provision of comfort and motivation) and in  
52 relation to specific activities (eg, listening to music and playing games). In one study only  
53  
54  
55  
56  
57  
58  
59  
60



1  
2  
3 [34], it is reported that participants to the long-term trials of the intervention commented  
4  
5 negatively with respect to their enjoyment in interacting with the robot, and furthermore that  
6  
7 this would decrease over time.  
8  
9

10  
11 *Usability.* Intuitiveness and easiness of use proved to be essential enablers towards the  
12  
13 implementation of SAHRs in six studies (50%). [30,31,33,34,36,38] Usability is to be  
14  
15 broadly intended in terms of lack of technical issues, intuitive interface, and design factoring  
16  
17 participants' disabilities.  
18  
19

20  
21 *Personalisation.* Engagement and enjoyment were found to be interlinked with the  
22  
23 personalisation of services, hence ultimately with overall use and implementation.  
24  
25 Personalisation should account for: adaptation to users' taste and preferences; [38,40] user's  
26  
27 care needs, [30] context, and routine; [31,41] and users' impairments. [33,38,41]  
28  
29  
30

31  
32 *Familiarisation.* Inasmuch as the robot should offer individualised services, users also should  
33  
34 learn about and adapt to the robot's status and intentions. [31] While the model of human-  
35  
36 robot co-dependent relationship is prominent in one study only, [31] other studies found  
37  
38 familiarisation to be an important factor positively affecting implementation. [33,34,36,38]  
39  
40 Interestingly, in one of these studies participants felt that, not only over time ease of use  
41  
42 would improve, but also that the relationship with the SAHR may turn into a friendship. [34]  
43  
44  
45

## 46 47 Barriers

48  
49  
50 *Technical problems.* Over half of the studies [30–32,34,35,37,41] explicitly stated that  
51  
52 technical issues with the robot itself constituted a barrier to SAHRs' implementation in health  
53  
54 and social care.  
55  
56  
57  
58  
59  
60

1  
2  
3 *SAHRs' limited capabilities.* The limited performance (ie, mobility, robots' voice, lack of  
4 interactive element) of the robot was found as a crucial barrier to use. This impediment was  
5 explicitly reported in four studies, [30,32,35,41] while more implicitly in other three, where  
6 the robot's restricted skills were described in terms of limited personalisation of services [38],  
7 adaptability, [34] and co-learning/self-training abilities. [31]  
8  
9

10  
11  
12  
13  
14  
15  
16 *Negative preconceptions.* In a study, health professionals' assumptions on older adults'  
17 capacity to interact with SAHR were included among the barriers to implementation. [37]  
18  
19 Two other studies elaborated on the negative views towards robots in terms of  
20 dehumanisation of care and society, [32,33] and of stigmatising effects associated to being a  
21 dependent individual in decline. [33] In three studies, negative preconceptions came from  
22 formal and informal carers rather than from older adults themselves. [30,32,37]  
23  
24  
25  
26  
27  
28  
29

### 30 Mixed views

31  
32  
33  
34 *Human-like attributes.* One study showed that human-like appearance was appreciated by  
35 one-third of the participants. [36] Another study reported that human-like communication  
36 was preferred over human-like appearance. [39] In the same study, 80% of the subjects  
37 completing the trial were older women who declared to prefer a male looking SAHR with  
38 male voice. [39] A third study concluded that SAHRs based on human-centred system with  
39 human-like characteristic are likely to enable acceptance and use. [38] However, in the same  
40 study, it was also reported that the fact that the SAHR was not judgemental facilitated  
41 interaction. [38] The ambivalence of having a non-judgmental conversational partner (ie,  
42 non-human) who was also given the overt social role of a human child was found beneficial  
43 to implementation in a fourth study. [41] SAHR's child-likeness was also found positive in a  
44 fifth study, and SAHR's small size was appreciated, albeit contributing to reduced acceptance  
45  
46  
47  
48  
49  
50  
51  
52  
53  
54  
55  
56  
57  
58  
59  
60

1  
2  
3 with low scores in attributed animacy and naturalness. [35] Similar ambivalent results are  
4  
5 found in a sixth study where again SAHR's small anthropomorphic shape was at the same  
6  
7 time responsible for low levels anxiety, but also for low scores in perceived social presence.  
8  
9 [34] In relation to social presence participants had contrasting views (ie, SAHR seen as pet or  
10  
11 a conversational partner). Differently from these last studies, in a seventh one participant did  
12  
13 not choose to walk side-by-side with the SAHR, as it would be natural with a human partner,  
14  
15 but chose to follow the SAHR, giving it the role of a guide. [40] Finally, in an eighth study,  
16  
17 the lack of more complex social interaction was identified as a barrier to implementation.  
18  
19 [30] None of the other studies provided any indication regarding the cultural attributes of the  
20  
21 SAHR. In one study only it is reported that the fact that the SAHR was speaking the same  
22  
23 language of the users was responsible of higher perceived ease of use compared to the cohort  
24  
25 where the SAHR was not using the users' native language. [34] In another study, it was  
26  
27 argued that the positive reception of the robot may be also attributed to the nature of the local  
28  
29 culture (ie, Japanese) towards robots. [41]  
30  
31  
32  
33  
34  
35

36 *Previous experience with ICT.* While one study found that previous experience with  
37  
38 technology positively correlated with use, [30] another trial found that there was no  
39  
40 relationship between previous experience and ease to use. [39] In other two studies, highly  
41  
42 experienced ICT users were excluded from participating in light of the argument that  
43  
44 acceptance is positively influenced by ICT experience. [34,35]  
45  
46  
47  
48

49 *The role of formal and informal caregivers.* As mentioned above, the negative attitudes of  
50  
51 formal and informal carers havw been shown to constitute an impediment to SAHRs  
52  
53 implementation. [30,32,37] Conversely, two studies highlighted the enabling effect of the  
54  
55 encouragement for SAHRs' use on behalf of relatives and professionals. [33,41]  
56  
57  
58  
59  
60

## DISCUSSION

### Summary of evidence

Our review focused on the identification of factors that could facilitate or hinder the implementation of SAHRs in health and social care. We focused on actual interactions of older adults with social humanoid robots in different settings in order to better understand what the current issues are in regard to implementation. Enablers, such as enjoyment and personalisation, were mainly related to the use of robots at an individual level. The element of enjoyment in the HRI was also elsewhere found to be crucial among hospital patients, [49] opening the doors for considering social humanoid robots as an intervention to combat social isolation in hospital settings.

Barriers were related to technical problems and to current limited capabilities of the robots. Technology malfunction and/or technology limitations were reported as areas of concern, similar to the results of a recent survey of Korean nurses. Surprisingly for the heavily regulated field of healthcare, the issues of safety, ethics, and safeguarding were not identified in this review as significant implementation-related factors, even though nurses and healthcare workers have been raising these issues. Safety and ethical issues were reported as major concerns in previous systematic reviews, and it is imperative that future research investigates these issues and understands their implications. The field of social humanoid robots poses many ethical challenges especially because robots could be designed to assume different roles and for different purposes: from service robots assisting in concierge types jobs to companion robots. In agreement with Vandemeulebroucke *et al*, [50] we believe that an ethical approach demands that all stakeholders should have a voice in the current debate but also in the design of future technologies, their application, and implementation. We also

1  
2  
3 agree with Chou *et al* [51] that future planning should view all these factors under a broader  
4 policy framework, and policy makers should work collaborative to ensure the ethical and safe  
5 implementation of robots. The European commission advocates for the use of a new  
6 framework to address the ethical issues in healthcare robotics called ‘Responsible Research  
7 and Innovation’. [52] Under this framework, society, users, and innovators are mutually  
8 responsive and engage in an interactive and transparent process in order for acceptable,  
9 sustainable, and desirable products to be developed and embedded in our society. Similarly,  
10 the Alan Turing Institute calls for the use of a framework of ethical values that need to guide  
11 every AI project and they introduce the use of four actionable principles: a) fairness, b)  
12 accountability, c) sustainability and d) transparency. [53] These principles are reflected onto  
13 the current UK code of conduct for data driven health and care technology, [54] and onto the  
14 current policy paper for the safe and ethical introduction of AI in the NHS. [55] Fairness  
15 refers to the avoidance of bias and discrimination, for example, according to it the AI system  
16 should use only fair and equitable data. Accountability refers instead to the auditability of the  
17 system, ensuring that responsibility of all actions is established throughout the AI system,  
18 from the design to the final implementation. Sustainability of the system refers to the safety,  
19 reliability, accuracy, and robustness of the system. Finally, transparency covers the ability of  
20 the designers to always explain how the system is working and how it will affect its users.  
21 Ensuring the use of ethical guidelines in the design of AI and robotics interventions is critical  
22 since many interventions are still designed without the consideration of ethics. [56]

23  
24  
25  
26  
27  
28  
29  
30  
31  
32  
33  
34  
35  
36  
37  
38  
39  
40  
41  
42  
43  
44  
45  
46  
47  
48  
49  
50 Robot’s appearance [30,36,38,39] and views of carers and relatives provided mixed results.  
51 [30,32,33,37] In regard to the appearance, Mori’s theory of the ‘uncanny valley’ is  
52 illuminating. [57] Between the animated and the perfectly realistic, human-like appearance of  
53 robots, there is an area where depictions can create uncomfortable feelings in humans.  
54  
55  
56  
57  
58  
59  
60

1  
2  
3 Therefore, life-like attributes of the robots, such as voice, facial expressions, gestures, bodily  
4 appearance, cultural attributes, and gender, have an impact on how the user experiences the  
5 robot, and on the HRI. The indeterminacy of robots' appearance is reflected onto the dramatic  
6 variations of SAHRs found in the literature. We also know that one's cultural background  
7 influences views and perceptions of the robot's aesthetics, [11] but none of the studies  
8 provided any indication regarding the cultural attributes of the SAHR. Culturally specific  
9 research on the relationship between appearance, acceptance, and implementation is therefore  
10 promising in HRI studies.  
11  
12

13  
14 According to our protocol, we searched for factors affecting the implementation of SAHRs  
15 by key stakeholders, such as health professionals. The role of formal and informal caregivers  
16 has been found as crucial. [58] However, the information we could yield was limited and  
17 mixed, and this is an area that urgently requires further research, involving longitudinal  
18 studies and larger samples. Longitudinal studies can provide the opportunity to investigate  
19 whether fear of using a new and unfamiliar technology or losing interest in a new technology  
20 (diminishing novelty effect) are related to negative attitudes. Abbott *et al* [8] on their review  
21 of the use of social robotic pets (animal-like social robots) found similar mixed feelings from  
22 the different stakeholders. The fact that people have very strong feelings on the opposite sides  
23 of the spectrum, either very positive or very negative, is significant to implementation and  
24 requires a careful investigation. The current Topol Review [23] addresses the changes and  
25 accompanied needs of the healthcare workforce that will be imposed by the digital revolution.  
26 It calls for an urgent need to educate and prepare the healthcare workforce for the imminent  
27 digital changes and for an organisational cultural change. However, it is hard to think how  
28 these transformations will happen when the current evidence reveals the existence of mixed  
29 opinions and negative attitudes towards at least the use of socially assistive robotic  
30  
31  
32  
33  
34  
35  
36  
37  
38  
39  
40  
41  
42  
43  
44  
45  
46  
47  
48  
49  
50  
51  
52  
53  
54  
55  
56  
57  
58  
59  
60

1  
2  
3 technologies.

4  
5  
6  
7 The completeness and overall applicability of the evidence is limited, mostly because it  
8 provides only insights into individual-level factors related to the acceptance of technology.

9  
10  
11 This can be partly attributed to the main theoretical framework used in the studies. The  
12  
13 Technology Acceptance Model (TAM) proposes in fact an explanation for a person's actual  
14 and intentional use of a technology through an exploration of their attitudes towards it. [44]

15  
16  
17  
18 The lack of evidence related to other main key stakeholders, such as formal and informal  
19 carers, along with factors related to the environment, policy, society and organisation is a  
20 major limitation. Exploring attitudes of other populations, such as formal caregivers, as well  
21 as the use of other theoretical models is considered critical. The field would benefit, for  
22  
23  
24  
25  
26  
27  
28  
29  
30  
31  
32  
33  
34  
35  
36  
37  
38  
39  
40  
41  
42  
43  
44  
45  
46  
47  
48  
49  
50  
51  
52  
53  
54  
55  
56  
57  
58  
59  
60

61  
62  
63  
64  
65  
66  
67  
68  
69  
70  
71  
72  
73  
74  
75  
76  
77  
78  
79  
80  
81  
82  
83  
84  
85  
86  
87  
88  
89  
90  
91  
92  
93  
94  
95  
96  
97  
98  
99  
100  
101  
102  
103  
104  
105  
106  
107  
108  
109  
110  
111  
112  
113  
114  
115  
116  
117  
118  
119  
120  
121  
122  
123  
124  
125  
126  
127  
128  
129  
130  
131  
132  
133  
134  
135  
136  
137  
138  
139  
140  
141  
142  
143  
144  
145  
146  
147  
148  
149  
150  
151  
152  
153  
154  
155  
156  
157  
158  
159  
160  
161  
162  
163  
164  
165  
166  
167  
168  
169  
170  
171  
172  
173  
174  
175  
176  
177  
178  
179  
180  
181  
182  
183  
184  
185  
186  
187  
188  
189  
190  
191  
192  
193  
194  
195  
196  
197  
198  
199  
200  
201  
202  
203  
204  
205  
206  
207  
208  
209  
210  
211  
212  
213  
214  
215  
216  
217  
218  
219  
220  
221  
222  
223  
224  
225  
226  
227  
228  
229  
230  
231  
232  
233  
234  
235  
236  
237  
238  
239  
240  
241  
242  
243  
244  
245  
246  
247  
248  
249  
250  
251  
252  
253  
254  
255  
256  
257  
258  
259  
260  
261  
262  
263  
264  
265  
266  
267  
268  
269  
270  
271  
272  
273  
274  
275  
276  
277  
278  
279  
280  
281  
282  
283  
284  
285  
286  
287  
288  
289  
290  
291  
292  
293  
294  
295  
296  
297  
298  
299  
300  
301  
302  
303  
304  
305  
306  
307  
308  
309  
310  
311  
312  
313  
314  
315  
316  
317  
318  
319  
320  
321  
322  
323  
324  
325  
326  
327  
328  
329  
330  
331  
332  
333  
334  
335  
336  
337  
338  
339  
340  
341  
342  
343  
344  
345  
346  
347  
348  
349  
350  
351  
352  
353  
354  
355  
356  
357  
358  
359  
360  
361  
362  
363  
364  
365  
366  
367  
368  
369  
370  
371  
372  
373  
374  
375  
376  
377  
378  
379  
380  
381  
382  
383  
384  
385  
386  
387  
388  
389  
390  
391  
392  
393  
394  
395  
396  
397  
398  
399  
400  
401  
402  
403  
404  
405  
406  
407  
408  
409  
410  
411  
412  
413  
414  
415  
416  
417  
418  
419  
420  
421  
422  
423  
424  
425  
426  
427  
428  
429  
430  
431  
432  
433  
434  
435  
436  
437  
438  
439  
440  
441  
442  
443  
444  
445  
446  
447  
448  
449  
450  
451  
452  
453  
454  
455  
456  
457  
458  
459  
460  
461  
462  
463  
464  
465  
466  
467  
468  
469  
470  
471  
472  
473  
474  
475  
476  
477  
478  
479  
480  
481  
482  
483  
484  
485  
486  
487  
488  
489  
490  
491  
492  
493  
494  
495  
496  
497  
498  
499  
500  
501  
502  
503  
504  
505  
506  
507  
508  
509  
510  
511  
512  
513  
514  
515  
516  
517  
518  
519  
520  
521  
522  
523  
524  
525  
526  
527  
528  
529  
530  
531  
532  
533  
534  
535  
536  
537  
538  
539  
540  
541  
542  
543  
544  
545  
546  
547  
548  
549  
550  
551  
552  
553  
554  
555  
556  
557  
558  
559  
560  
561  
562  
563  
564  
565  
566  
567  
568  
569  
570  
571  
572  
573  
574  
575  
576  
577  
578  
579  
580  
581  
582  
583  
584  
585  
586  
587  
588  
589  
590  
591  
592  
593  
594  
595  
596  
597  
598  
599  
600  
601  
602  
603  
604  
605  
606  
607  
608  
609  
610  
611  
612  
613  
614  
615  
616  
617  
618  
619  
620  
621  
622  
623  
624  
625  
626  
627  
628  
629  
630  
631  
632  
633  
634  
635  
636  
637  
638  
639  
640  
641  
642  
643  
644  
645  
646  
647  
648  
649  
650  
651  
652  
653  
654  
655  
656  
657  
658  
659  
660  
661  
662  
663  
664  
665  
666  
667  
668  
669  
670  
671  
672  
673  
674  
675  
676  
677  
678  
679  
680  
681  
682  
683  
684  
685  
686  
687  
688  
689  
690  
691  
692  
693  
694  
695  
696  
697  
698  
699  
700  
701  
702  
703  
704  
705  
706  
707  
708  
709  
710  
711  
712  
713  
714  
715  
716  
717  
718  
719  
720  
721  
722  
723  
724  
725  
726  
727  
728  
729  
730  
731  
732  
733  
734  
735  
736  
737  
738  
739  
740  
741  
742  
743  
744  
745  
746  
747  
748  
749  
750  
751  
752  
753  
754  
755  
756  
757  
758  
759  
760  
761  
762  
763  
764  
765  
766  
767  
768  
769  
770  
771  
772  
773  
774  
775  
776  
777  
778  
779  
780  
781  
782  
783  
784  
785  
786  
787  
788  
789  
790  
791  
792  
793  
794  
795  
796  
797  
798  
799  
800  
801  
802  
803  
804  
805  
806  
807  
808  
809  
810  
811  
812  
813  
814  
815  
816  
817  
818  
819  
820  
821  
822  
823  
824  
825  
826  
827  
828  
829  
830  
831  
832  
833  
834  
835  
836  
837  
838  
839  
840  
841  
842  
843  
844  
845  
846  
847  
848  
849  
850  
851  
852  
853  
854  
855  
856  
857  
858  
859  
860  
861  
862  
863  
864  
865  
866  
867  
868  
869  
870  
871  
872  
873  
874  
875  
876  
877  
878  
879  
880  
881  
882  
883  
884  
885  
886  
887  
888  
889  
890  
891  
892  
893  
894  
895  
896  
897  
898  
899  
900  
901  
902  
903  
904  
905  
906  
907  
908  
909  
910  
911  
912  
913  
914  
915  
916  
917  
918  
919  
920  
921  
922  
923  
924  
925  
926  
927  
928  
929  
930  
931  
932  
933  
934  
935  
936  
937  
938  
939  
940  
941  
942  
943  
944  
945  
946  
947  
948  
949  
950  
951  
952  
953  
954  
955  
956  
957  
958  
959  
960  
961  
962  
963  
964  
965  
966  
967  
968  
969  
970  
971  
972  
973  
974  
975  
976  
977  
978  
979  
980  
981  
982  
983  
984  
985  
986  
987  
988  
989  
990  
991  
992  
993  
994  
995  
996  
997  
998  
999  
1000

1  
2  
3 viewing aging a process of continued losses and older adults needing assistance – restricts the  
4  
5 design of new technologies. A successful model of aging that focuses on the preservation of  
6  
7 the user’s autonomy can instead provide new ways of using, designing, and implementing  
8  
9 socially assistive robots. [63]  
10  
11  
12

### 13 **Limitations**

14  
15  
16  
17 As per protocol, our intention was to explore enablers and barriers to the implementation of  
18  
19 SAHRs in both health and social care but, in fact, most of the activities assessed were more  
20  
21 relevant to social care. Even medication reminders, which are obviously health-related, form  
22  
23 an important part of social care. There is therefore little to inform health practitioners as to  
24  
25 the possible application of SAHRs in health settings. Furthermore, very few studies have  
26  
27 deployed and implemented SAHRs in health and social care settings, hence the available  
28  
29 information is scant. In addition, quality of the studies is problematic (Table 2).  
30  
31  
32

33  
34 The heterogeneity of study designs led to the identification of factors in single studies. For  
35  
36 example, only one study reported on the level of education as enabling factor of SAHRs’  
37  
38 acceptance. [36] Another study found that fear of making mistakes with technology was a  
39  
40 barrier to implementation. [32] However, in another study, uneasiness with technology  
41  
42 seemed to be counterbalanced by a sense of discovery and being up-to-date with ICT. [33]  
43  
44

45  
46 The evidence is too scant to generalise these initial findings, and further research is needed to  
47  
48 assess the impact of these, and other factors, onto SAHRs’ acceptance and implementation in  
49  
50 health and social care.  
51  
52

## 53 **CONCLUSION AND PERSPECTIVES**

54  
55  
56  
57 The use of SAHRs is promising in responding to some of the care challenges of an ageing  
58  
59  
60



1  
2  
3 population. This systematic review summarised the enablers and barriers to the  
4  
5 implementation of SAHRs in health and social care. Evidence suggests that enjoyment and  
6  
7 personalisation are the chief enablers to the implementation of robots, whilst the two most  
8  
9 important barriers had to do with technical problems and the limited capabilities of the  
10  
11 robots. However, there are limitations to the evidence, as most studies were at high risk of  
12  
13 bias involving very small samples. Gaps in the evidence include factors related to  
14  
15 environment, organisation, socio-cultural milieu, policy and legal framework. Furthermore,  
16  
17 the research focus has currently been placed on understanding the acceptance of robots by  
18  
19 adult users, but there is no discussion of the needs of the healthcare workforce on a  
20  
21 professional level, and how these needs are being met by educational institutions,  
22  
23 professional organisations, and employers.  
24  
25  
26  
27  
28  
29  
30  
31  
32  
33  
34  
35  
36  
37  
38  
39  
40  
41  
42  
43  
44  
45  
46  
47  
48  
49  
50  
51  
52  
53  
54  
55  
56  
57  
58  
59  
60

## **Acknowledgments**

We would like to thank Dr Zbys Fedorowicz for his contributions and helpful advice.

## **Author statement**

RP and CK conceived and designed the study. CK and SA acquired, screened and conducted the initial data extraction. RP acted as a referee in the screening, analysis and interpretation of the data, conducted by CK and RL who drafted the manuscript, and RP provided the critical review of it. All authors approved the version to be published and agreed to be accountable for all the aspects of this work.

## **Funding**

This work was supported by CARESSES (Horizon 2020, Grant Agreement ID: 737858) and additional funds from the Middlesex University, School of Health & Education.

## **Competing interests' statement**

None. The authors whose names are listed above certify that they have NO affiliations with or involvement in any organization or entity with any financial interest or non-financial interest in the subject matter or materials discussed in this manuscript.

## **Data sharing statement**

Data are available upon reasonable request. Completed data extraction tables and Public Health Critical Appraisal Checklist tables for all studies are available from the corresponding author of this review and their use is permitted once their use is clarified. No additional information is available.

## **Patient and public involvement**

It was not appropriate or possible to involve patients or the public in this work.

Figure 1. PRISMA flow chart

Figure 2. Summary of results

## REFERENCES

- 1 World Health Organization. Ageing and health. 2018. <https://www.who.int/news-room/fact-sheets/detail/ageing-and-health> (accessed 2 Apr 2019).
- 2 UK Government. Policy Paper. The Grand Challenges. 2018. <https://www.gov.uk/government/publications/industrial-strategy-the-grand-challenges/industrial-strategy-the-grand-challenges> (accessed 8 Apr 2019).
- 3 Tapus A, Mataric MJ, Scassellati B. Socially assistive robotics [Grand Challenges of Robotics]. *IEEE Robotics & Automation Magazine* 2007;**14**:35–42. doi:10.1109/mra.2007.339605
- 4 Feil-Seifer D, Mataric MJ. Defining socially assistive robotics. In: *9th International Conference on Rehabilitation Robotics, 2005. ICORR 2005*. 2005. 465–8. doi:10.1109/ICORR.2005.1501143
- 5 Khosravi P, Ghapanchi AH. Investigating the effectiveness of technologies applied to assist seniors: A systematic literature review. *International Journal of Medical Informatics* 2016;**85**:17–26. doi:10.1016/j.ijmedinf.2015.05.014
- 6 Abdi J, Al-Hindawi A, Ng T, *et al*. Scoping review on the use of socially assistive robot technology in elderly care. *BMJ Open* 2018;**8**:e018815. doi:10.1136/bmjopen-2017-018815
- 7 Pu L, Moyle W, Jones C, *et al*. The Effectiveness of Social Robots for Older Adults: A Systematic Review and Meta-Analysis of Randomized Controlled Studies. *Gerontologist* 2019;**59**:e37–51. doi:10.1093/geront/gny046
- 8 Abbott R, Orr N, McGill P, *et al*. How do “robopets” impact the health and well-being of residents in care homes? A systematic review of qualitative and quantitative evidence. *Int J Older People Nurs* 2019;:e12239. doi:10.1111/opn.12239
- 9 Aarskog NK, Hunskår I, Bruvik F. Animal-Assisted Interventions With Dogs and Robotic Animals for Residents With Dementia in Nursing Homes: A Systematic Review. *Physical & Occupational Therapy In Geriatrics* 2019;**37**:77–93. doi:10.1080/02703181.2019.1613466
- 10 Broadbent E, Stafford R, MacDonald B. Acceptance of Healthcare Robots for the Older Population: Review and Future Directions. *Int J of Soc Robotics* 2009;**1**:319. doi:10.1007/s12369-009-0030-6
- 11 Papadopoulos I, Koulouglioti C. The Influence of Culture on Attitudes Towards Humanoid and Animal-like Robots: An Integrative Review. *J Nurs Scholarsh* 2018;**50**:653–65. doi:10.1111/jnu.12422

- 12 Vandemeulebroucke T, de Casterlé BD, Gastmans C. How do older adults experience and perceive socially assistive robots in aged care: a systematic review of qualitative evidence. *Aging Ment Health* 2018;**22**:149–67. doi:10.1080/13607863.2017.1286455
- 13 Papadopoulos I, Koulouglioti C, Ali S. Views of nurses and other health and social care workers on the use of assistive humanoid and animal-like robots in health and social care: a scoping review. *Contemp Nurse* 2018;**54**:425–42. doi:10.1080/10376178.2018.1519374
- 14 Cresswell K, Cunningham-Burley S, Sheikh A. Health Care Robotics: Qualitative Exploration of Key Challenges and Future Directions. *Journal of Medical Internet Research* 2018;**20**:e10410. doi:10.2196/10410
- 15 Frennert S, Östlund B. Review: Seven Matters of Concern of Social Robots and Older People. *Int J of Soc Robotics* 2014;**6**:299–310. doi:10.1007/s12369-013-0225-8
- 16 Elliott L. Workers at risk as robots set to replace 66m jobs, warns OECD. The Guardian. 2018. <https://www.theguardian.com/business/2018/apr/03/robots-could-take-over-more-than-65m-jobs-warns-oecd-report> (accessed 2 Apr 2019).
- 17 Chui M, Manyika J, Miremadi M. Where machines could replace humans--and where they can't (yet) | McKinsey Digital 2016. <https://www.mckinsey.com/business-functions/digital-mckinsey/our-insights/where-machines-could-replace-humans-and-where-they-cant-yet> (accessed 2 Apr 2019).
- 18 Papadopoulos I, Sgorbissa A, Koulouglioti C. Caring robots are here to help. *arXiv:180311243 [cs]* Published Online First: 22 March 2018. doi:10.7748/ns.31.51.18.s22.
- 19 Blair L. Mind healing: why are we so afraid of robots? The Telegraph. 2017. <https://www.telegraph.co.uk/health-fitness/mind/mind-healing-afraid-robots/> (accessed 2 Apr 2019).
- 20 PwC. Will robots really steal our jobs? An international analysis of the potential long term impact of automation. PricewaterhouseCoopers LLP 2018.
- 21 James Manyika, Lund S, Chui M, *et al*. Jobs lost, Jobs gained: Workforce transitions in a time of automation. McKinsey Global Institute 2017.
- 22 New Research Shows How AI Will Impact the Workforce. *Robotics Business Review* 2019. <https://www.roboticsbusinessreview.com/ai/new-research-shows-how-ai-will-impact-the-workforce/> (accessed 22 Nov 2019).
- 23 Health Education England. The Topol Review. Preparing the healthcare workforce to deliver the digital future. Secretary of State for Health and Social Care 2019.
- 24 Dahl TS, Boulos MNK. Robots in Health and Social Care: A Complementary Technology to Home Care and Telehealthcare? *Robotics* 2014;**3**:1–21. doi:10.3390/robotics3010001

- 1  
2  
3 25 Robert N. How artificial intelligence is changing nursing. *Nursing Management*  
4 2019;**50**:30. doi:10.1097/01.NUMA.0000578988.56622.21  
5  
6  
7 26 Yen P-Y, Kellye M, Lopetegui M, *et al.* Nurses' Time Allocation and Multitasking of  
8 Nursing Activities: A Time Motion Study. *AMIA Annu Symp Proc* 2018;**2018**:1137–46.  
9  
10 27 Kellermeyer L, Harnke B, Knight S. Covidence and Rayyan. *J Med Libr Assoc*  
11 2018;**106**:580–3. doi:10.5195/jmla.2018.513  
12  
13 28 Ouzzani M, Hammady H, Fedorowicz Z, *et al.* Rayyan—a web and mobile app for  
14 systematic reviews. *Syst Rev* 2016;**5**. doi:10.1186/s13643-016-0384-4  
15  
16  
17 29 Moher D, Liberati A, Tetzlaff J, *et al.* Preferred Reporting Items for Systematic Reviews  
18 and Meta-Analyses: The PRISMA Statement. *PLOS Medicine* 2009;**6**:e1000097.  
19 doi:10.1371/journal.pmed.1000097  
20  
21 30 Bedaf S, Marti P, Amirabdollahian F, *et al.* A multi-perspective evaluation of a service  
22 robot for seniors: the voice of different stakeholders. *Disabil Rehabil Assist Technol*  
23 2017;**13**:592–9. doi:10.1080/17483107.2017.1358300  
24  
25  
26 31 Caleb-Solly P, Dogramadzi S, Huijnen CAGJ, *et al.* Exploiting ability for human  
27 adaptation to facilitate improved human-robot interaction and acceptance. *The*  
28 *Information Society* 2018;**34**:153–65. doi:10.1080/01972243.2018.1444255  
29  
30  
31 32 Hebesberger D, Koertner T, Gisinger C, *et al.* A Long-Term Autonomous Robot at a  
32 Care Hospital: A Mixed Methods Study on Social Acceptance and Experiences of Staff  
33 and Older Adults. *Int J of Soc Robotics* 2017;**9**:417–29. doi:10.1007/s12369-016-0391-6  
34  
35  
36 33 Wu Y-H, Wrobel J, Cornuet M, *et al.* Acceptance of an assistive robot in older adults: a  
37 mixed-method study of human-robot interaction over a 1-month period in the Living Lab  
38 setting. *Clin Interv Aging* 2014;**9**:801–11. doi:10.2147/CIA.S56435  
39  
40  
41 34 Torta E, Werner F, Johnson DO, *et al.* Evaluation of a Small Socially-Assistive  
42 Humanoid Robot in Intelligent Homes for the Care of the Elderly. *J Intell Robot Syst*  
43 2014;**76**:57–71. doi:10.1007/s10846-013-0019-0  
44  
45  
46 35 Werner K, Oberzaucher J, Werner F. Evaluation of Human Robot Interaction Factors of a  
47 Socially Assistive Robot Together with Older People. In: *2012 Sixth International*  
48 *Conference on Complex, Intelligent, and Software Intensive Systems*. 2012. 455–60.  
49 doi:10.1109/CISIS.2012.36  
50  
51 36 Beuscher LM, Fan J, Sarkar N, *et al.* Socially Assistive Robots: Measuring Older Adults'  
52 Perceptions. *J Gerontol Nurs* 2017;**43**:35–43. doi:10.3928/00989134-20170707-04  
53  
54  
55 37 Loi SM, Bennett A, Pearce M, *et al.* A pilot study exploring staff acceptability of a  
56 socially assistive robot in a residential care facility that accommodates people under 65  
57 years old. *International Psychogeriatrics* 2017;**30**:1075–80.  
58 doi:10.1017/S1041610217002617  
59  
60

- 1  
2  
3 38 Khosla R, Nguyen K, Chu M-T. Human Robot Engagement and Acceptability in  
4 Residential Aged Care. *International Journal of Human-Computer Interaction*  
5 2017;**33**:510–22. doi:10.1080/10447318.2016.1275435  
6  
7  
8 39 Louie W-YG, McColl D, Nejat G. Acceptance and Attitudes Toward a Human-like  
9 Socially Assistive Robot by Older Adults. *Assistive Technology* 2014;**26**:140–50.  
10 doi:10.1080/10400435.2013.869703  
11  
12 40 Piezzo C, Suzuki K. Feasibility Study of a Socially Assistive Humanoid Robot for  
13 Guiding Elderly Individuals during Walking. *Future Internet* 2017;**9**:30.  
14 doi:10.3390/fi9030030  
15  
16  
17 41 Sabelli AM, Kanda T, Hagita N. A Conversational Robot in an Elderly Care Center: An  
18 Ethnographic Study. In: *Proceedings of the 6th International Conference on Human-*  
19 *robot Interaction*. New York, NY, USA: : ACM 2011. 37–44.  
20 doi:10.1145/1957656.1957669  
21  
22 42 Higgins JPT, Altman DG, Gøtzsche PC, *et al*. The Cochrane Collaboration’s tool for  
23 assessing risk of bias in randomised trials. *BMJ* 2011;**343**:d5928. doi:10.1136/bmj.d5928  
24  
25  
26 43 Heller RF, Verma A, Gemmell I, *et al*. Critical appraisal for public health: A new  
27 checklist. *Public Health* 2008;**122**:92–8. doi:10.1016/j.puhe.2007.04.012  
28  
29  
30 44 Davis FD, Bagozzi RP, Warshaw PR. User Acceptance of Computer Technology: A  
31 Comparison of Two Theoretical Models. *Management Science* 1989;**35**:982–1003.  
32 doi:10.1287/mnsc.35.8.982  
33  
34 45 Heerink M, Kröse B, Evers V, *et al*. Assessing Acceptance of Assistive Social Agent  
35 Technology by Older Adults: the Almere Model. *Int J of Soc Robotics* 2010;**2**:361–75.  
36 doi:10.1007/s12369-010-0068-5  
37  
38  
39 46 Glaser BG, Strauss AL. *Discovery of Grounded Theory: Strategies for Qualitative*  
40 *Research*. 1 edition. New Brunswick: : Aldine Transaction 2000.  
41  
42 47 Intrinsic Motivation Inventory (IMI) – selfdeterminationtheory.org.  
43 <https://selfdeterminationtheory.org/intrinsic-motivation-inventory/> (accessed 13 Sep  
44 2019).  
45  
46  
47 48 Fan J, Bian D, Zheng Z, *et al*. A Robotic Coach Architecture for Elder Care (ROCARE)  
48 Based on Multi-User Engagement Models. *IEEE Transactions on Neural Systems and*  
49 *Rehabilitation Engineering* 2017;**25**:1153–63. doi:10.1109/TNSRE.2016.2608791  
50  
51  
52 49 Sarabia M, Young N, Canavan K, *et al*. Assistive Robotic Technology to Combat Social  
53 Isolation in Acute Hospital Settings. *International Journal of Social Robotics*  
54 2018;**10**:607–20. doi:10.1007/s12369-017-0421-z  
55  
56  
57  
58  
59  
60

- 1  
2  
3 50 Vandemeulebroucke T, Dierckx de Casterlé B, Gastmans C. The use of care robots in  
4 aged care: A systematic review of argument-based ethics literature. *Arch Gerontol*  
5 *Geriatr* 2018;**74**:15–25. doi:10.1016/j.archger.2017.08.014  
6  
7  
8 51 Chou Y, Wang SB, Lin Y. Long-term care and technological innovation: the application  
9 and policy development of care robots in Taiwan. *Journal of Asian Public Policy*  
10 2019;**12**:104–23. doi:10.1080/17516234.2018.1492315  
11  
12 52 Stahl BC, Coeckelbergh M. Ethics of healthcare robotics: Towards responsible research  
13 and innovation. *Robotics and Autonomous Systems* 2016;**86**:152–61.  
14 doi:10.1016/j.robot.2016.08.018  
15  
16  
17 53 Leslie D. Understanding artificial intelligence ethics and safety. A guide for the  
18 responsible design and implementation of AI systems in the public sector. The Alan  
19 Turing Institute 2019.  
20  
21  
22 54 Department of Health and Social Care. Code of conduct for data-driven health and care  
23 technology. London: : UK Government 2019.  
24 [https://www.gov.uk/government/publications/code-of-conduct-for-data-driven-health-](https://www.gov.uk/government/publications/code-of-conduct-for-data-driven-health-and-care-technology/initial-code-of-conduct-for-data-driven-health-and-care-technology)  
25 [and-care-technology/initial-code-of-conduct-for-data-driven-health-and-care-technology](https://www.gov.uk/government/publications/code-of-conduct-for-data-driven-health-and-care-technology/initial-code-of-conduct-for-data-driven-health-and-care-technology)  
26 (accessed 22 Nov 2019).  
27  
28  
29 55 Artificial Intelligence: How to get it right Putting policy into practice for safe data-driven  
30 innovation in health and care. London: : NHSX 2019.  
31 [https://www.nhs.uk/assets/NHSX\\_AI\\_report.pdf](https://www.nhs.uk/assets/NHSX_AI_report.pdf) (accessed 22 Nov 2019).  
32  
33  
34 56 Ienca M, Wangmo T, Jotterand F, *et al.* Ethical Design of Intelligent Assistive  
35 Technologies for Dementia: A Descriptive Review. *Sci Eng Ethics* 2018;**24**:1035–55.  
36 doi:10.1007/s11948-017-9976-1  
37  
38 57 Mori M. The Uncanny Valley. *IEEE Robotics Automation Magazine* 2012;**19**:98–100.  
39 doi:10.1109/MRA.2012.2192811  
40  
41  
42 58 Barrett E, Murphy K, Mannion A, *et al.* Can Social Robots Help to Reduce Loneliness  
43 and Social Isolation in People with Dementia? A Delphi Survey. *Age Ageing*  
44 2017;**46**:iii13–59. doi:10.1093/ageing/afx144.114  
45  
46  
47 59 Rogers EM. *Diffusion of innovations*. 4th ed. New York: : Free Press 1995.  
48  
49  
50 60 Locsin RC. The Co-Existence of Technology and Caring in the Theory of Technological  
51 Competency as Caring in Nursing. *The Journal of Medical Investigation* 2017;**64**:160–4.  
52 doi:10.2152/jmi.64.160  
53  
54 61 M. King B, D. Barry C. “Caring Between” the Nurse, the One Nursed, and the Healthcare  
55 Robot: An Interpreted Nursing Situation Using the Barry, Gordon, King Framework.  
56 *International Journal for Human Caring* 2019;**23**:168–77. doi:10.20467/1091-  
57 5710.23.2.168  
58  
59  
60

1  
2  
3 62 Papadopoulos I. *Culturally Competent Compassion*. Oxon: : Routledge 2018.  
4

5 63 Lee HR, Riek LD. Reframing Assistive Robots to Promote Successful Aging. *ACM*  
6 *Trans Hum-Robot Interact* 2018;7:1–23. doi:10.1145/3203303  
7  
8  
9

10  
11 \_\_\_\_\_  
12  
13  
14  
15  
16  
17  
18  
19  
20  
21  
22  
23  
24  
25  
26  
27  
28  
29  
30  
31  
32  
33  
34  
35  
36  
37  
38  
39  
40  
41  
42  
43  
44  
45  
46  
47  
48  
49  
50  
51  
52  
53  
54  
55  
56  
57  
58  
59  
60

For peer review only



1  
2  
3  
4  
5  
6  
7  
8  
9  
10  
11  
12  
13  
14  
15  
16  
17  
18  
19  
20  
21  
22  
23  
24  
25  
26  
27  
28  
29  
30  
31  
32  
33  
34  
35  
36  
37  
38  
39  
40  
41  
42  
43  
44  
45  
46  
47  
48  
49  
50  
51  
52  
53  
54  
55  
56  
57  
58  
59  
60

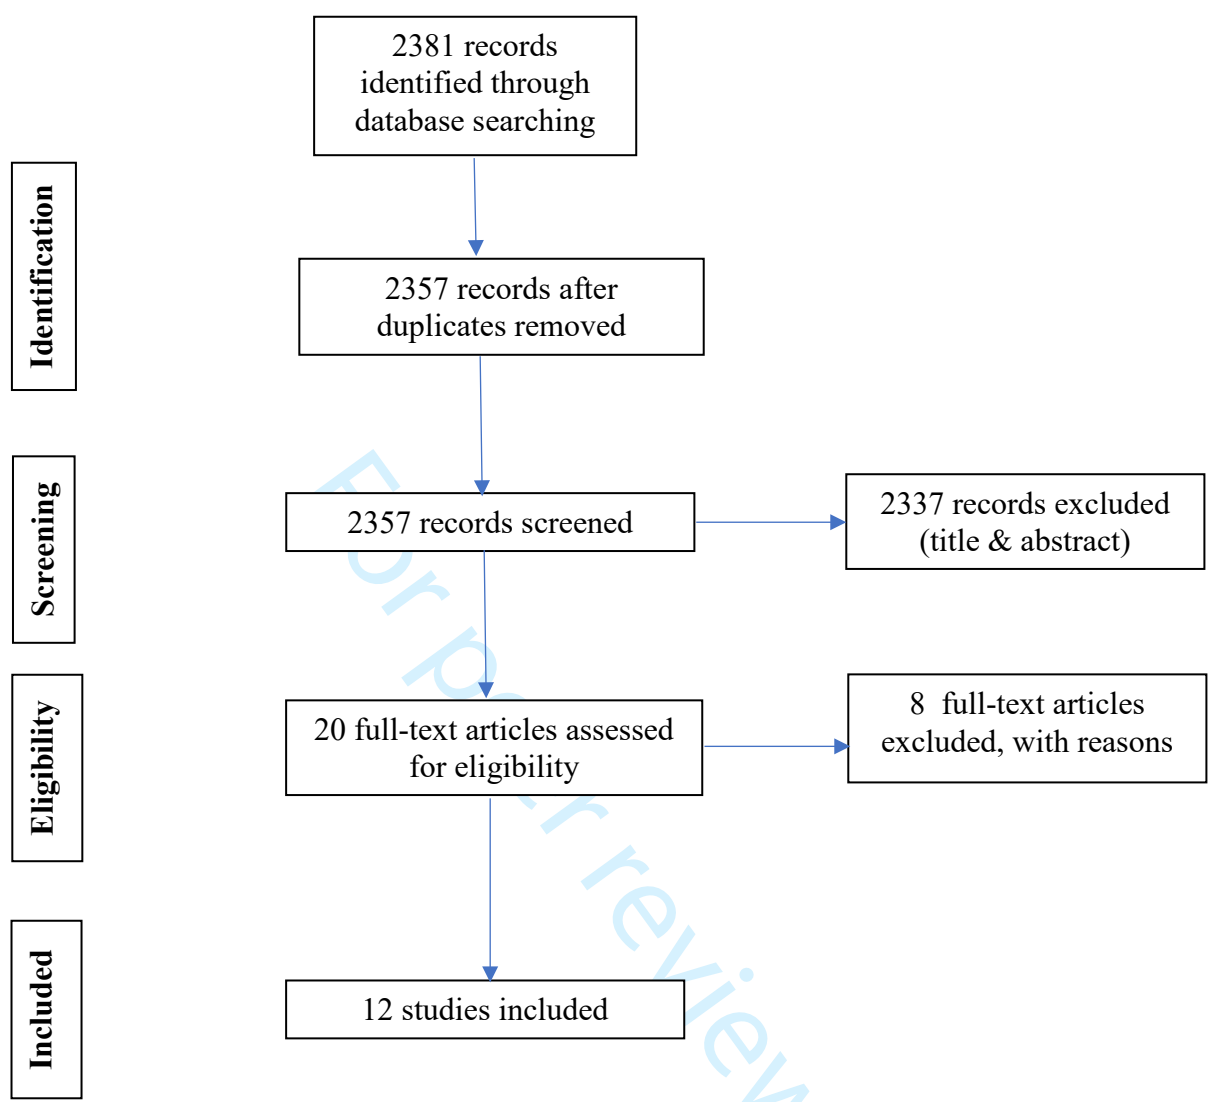

Figure 1. PRISMA flow chart

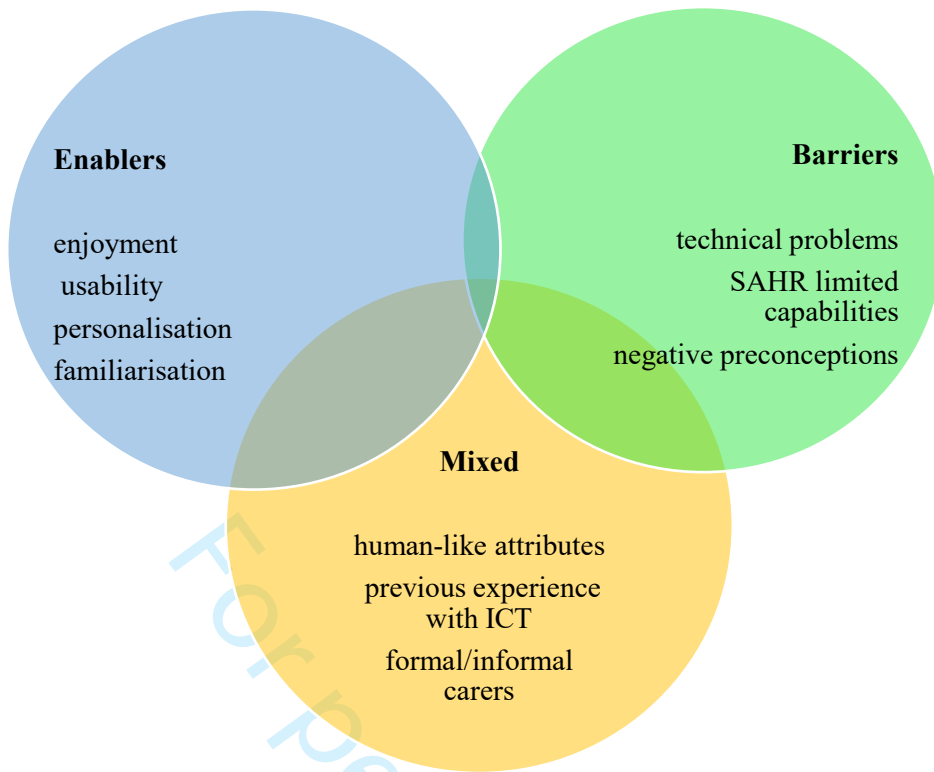

Figure 2. Summary of Results

For peer review only

1  
2  
3 **DATA EXTRACTION TABLE**  
4

5 **Name of study:**

**Assessor**

7 **Interventions: dose/frequency/duration etc**

8 **Intervention**

10 **Comparator**

12 **Outcome measures according to us, of our review (not from authors of study)**

13 **1. Primary outcomes**

14 The identification of a comprehensive listing of enablers and barriers to the implementation of  
15 Socially Assistive Humanoid Robots (SAHR) in health and social care.

16 Barriers: those impeding the implementation of SAHR which may include factors, issues or themes at  
17 local, system or policy level.

18 Enablers: mechanisms and initiatives whereby patients' providers or policy makers contribute to  
19 facilitating the positive uptake and implementation of SAHR.

20 **2. Secondary outcomes**

21 The insights from these enablers and barriers and their impact.

22 Gaps and future developments to inform further research.

23 **Principal outcome measures: (from the authors in the study)**

24 a) ...

25 b) ...

26 c) ...

27 **What were the results of these outcome measures?**

28 **Measure a)**

|    | Pre | Post |                |
|----|-----|------|----------------|
| 1. |     |      | Fisher's exact |
| 2. |     |      |                |

31 **Measure b) and c)**

32 **Barriers**

33 **Enablers**

34 **Gaps and future developments**

35 **SUMMARY**

36 Identified Enablers from this study:

1. ...

2. ...

37 Identified Barriers:

1. ...

2. ...

38 **Conclusive remarks**

39 **Useful References**

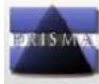

# PRISMA 2009 Checklist

1  
2  
3  
4  
5  
6  
7  
8  
9  
10  
11  
12  
13  
14  
15  
16  
17  
18  
19  
20  
21  
22  
23  
24  
25  
26  
27  
28  
29  
30  
31  
32  
33  
34  
35  
36  
37  
38  
39  
40  
41  
42  
43  
44  
45  
46  
47

| Section/topic                      | #  | Checklist item                                                                                                                                                                                                                                                                                              | Reported on page # |
|------------------------------------|----|-------------------------------------------------------------------------------------------------------------------------------------------------------------------------------------------------------------------------------------------------------------------------------------------------------------|--------------------|
| <b>TITLE</b>                       |    |                                                                                                                                                                                                                                                                                                             |                    |
| Title                              | 1  | Identify the report as a systematic review, meta-analysis, or both.                                                                                                                                                                                                                                         | 1                  |
| <b>ABSTRACT</b>                    |    |                                                                                                                                                                                                                                                                                                             |                    |
| Structured summary                 | 2  | Provide a structured summary including, as applicable: background; objectives; data sources; study eligibility criteria, participants, and interventions; study appraisal and synthesis methods; results; limitations; conclusions and implications of key findings; systematic review registration number. | 2                  |
| <b>INTRODUCTION</b>                |    |                                                                                                                                                                                                                                                                                                             |                    |
| Rationale                          | 3  | Describe the rationale for the review in the context of what is already known.                                                                                                                                                                                                                              | 4-6                |
| Objectives                         | 4  | Provide an explicit statement of questions being addressed with reference to participants, interventions, comparisons, outcomes, and study design (PICOS).                                                                                                                                                  | 6                  |
| <b>METHODS</b>                     |    |                                                                                                                                                                                                                                                                                                             |                    |
| Protocol and registration          | 5  | Indicate if a review protocol exists, if and where it can be accessed (e.g., Web address), and, if available, provide registration information including registration number.                                                                                                                               | 2, 9               |
| Eligibility criteria               | 6  | Specify study characteristics (e.g., PICOS, length of follow-up) and report characteristics (e.g., years considered, language, publication status) used as criteria for eligibility, giving rationale.                                                                                                      | 8                  |
| Information sources                | 7  | Describe all information sources (e.g., databases with dates of coverage, contact with study authors to identify additional studies) in the search and date last searched.                                                                                                                                  | 6-7                |
| Search                             | 8  | Present full electronic search strategy for at least one database, including any limits used, such that it could be repeated.                                                                                                                                                                               | 6-7, and Table 1   |
| Study selection                    | 9  | State the process for selecting studies (i.e., screening, eligibility, included in systematic review, and, if applicable, included in the meta-analysis).                                                                                                                                                   | 8                  |
| Data collection process            | 10 | Describe method of data extraction from reports (e.g., piloted forms, independently, in duplicate) and any processes for obtaining and confirming data from investigators.                                                                                                                                  | 9                  |
| Data items                         | 11 | List and define all variables for which data were sought (e.g., PICOS, funding sources) and any assumptions and simplifications made.                                                                                                                                                                       | 9                  |
| Risk of bias in individual studies | 12 | Describe methods used for assessing risk of bias of individual studies (including specification of whether this was done at the study or outcome level), and how this information is to be used in any data synthesis.                                                                                      | 9, 10-12 (Table 2) |
| Summary measures                   | 13 | State the principal summary measures (e.g., risk ratio, difference in means).                                                                                                                                                                                                                               | n/a                |
| Synthesis of results               | 14 | Describe the methods of handling data and combining results of studies, if done, including measures of consistency (e.g., $I^2$ ) for each meta-analysis.                                                                                                                                                   | 8-9                |



# PRISMA 2009 Checklist

Page 1 of 2

| Section/topic                 | #  | Checklist item                                                                                                                                                                                           | Reported on page #       |
|-------------------------------|----|----------------------------------------------------------------------------------------------------------------------------------------------------------------------------------------------------------|--------------------------|
| Risk of bias across studies   | 15 | Specify any assessment of risk of bias that may affect the cumulative evidence (e.g., publication bias, selective reporting within studies).                                                             | n/a                      |
| Additional analyses           | 16 | Describe methods of additional analyses (e.g., sensitivity or subgroup analyses, meta-regression), if done, indicating which were pre-specified.                                                         | n/a                      |
| <b>RESULTS</b>                |    |                                                                                                                                                                                                          |                          |
| Study selection               | 17 | Give numbers of studies screened, assessed for eligibility, and included in the review, with reasons for exclusions at each stage, ideally with a flow diagram.                                          | 9, and Figure 1 (Prisma) |
| Study characteristics         | 18 | For each study, present characteristics for which data were extracted (e.g., study size, PICOS, follow-up period) and provide the citations.                                                             | 14-20, including Table 3 |
| Risk of bias within studies   | 19 | Present data on risk of bias of each study and, if available, any outcome level assessment (see item 12).                                                                                                | 10-13, including Table 2 |
| Results of individual studies | 20 | For all outcomes considered (benefits or harms), present, for each study: (a) simple summary data for each intervention group (b) effect estimates and confidence intervals, ideally with a forest plot. | 15-19 (Table 3)          |
| Synthesis of results          | 21 | Present results of each meta-analysis done, including confidence intervals and measures of consistency.                                                                                                  | 18-24                    |
| Risk of bias across studies   | 22 | Present results of any assessment of risk of bias across studies (see Item 15).                                                                                                                          | n/a                      |
| Additional analysis           | 23 | Give results of additional analyses, if done (e.g., sensitivity or subgroup analyses, meta-regression [see Item 16]).                                                                                    | n/a                      |
| <b>DISCUSSION</b>             |    |                                                                                                                                                                                                          |                          |
| Summary of evidence           | 24 | Summarize the main findings including the strength of evidence for each main outcome; consider their relevance to key groups (e.g., healthcare providers, users, and policy makers).                     | 25-28                    |
| Limitations                   | 25 | Discuss limitations at study and outcome level (e.g., risk of bias), and at review-level (e.g., incomplete retrieval of identified research, reporting bias).                                            | 28-29                    |
| Conclusions                   | 26 | Provide a general interpretation of the results in the context of other evidence, and implications for future research.                                                                                  | 29                       |
| <b>FUNDING</b>                |    |                                                                                                                                                                                                          |                          |
| Funding                       | 27 | Describe sources of funding for the systematic review and other support (e.g., supply of data); role of funders for the systematic review.                                                               | 30                       |

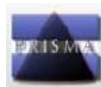

# PRISMA 2009 Checklist

1  
2  
3  
4 *From:* Moher D, Liberati A, Tetzlaff J, Altman DG, The PRISMA Group (2009). Preferred Reporting Items for Systematic Reviews and Meta-Analyses: The PRISMA Statement. PLoS Med 6(7): e1000097.  
5 doi:10.1371/journal.pmed1000097. For more information, visit: [www.prisma-statement.org](http://www.prisma-statement.org).  
6  
7  
8  
9  
10  
11  
12  
13  
14  
15  
16  
17  
18  
19  
20  
21  
22  
23  
24  
25  
26  
27  
28  
29  
30  
31  
32  
33  
34  
35  
36  
37  
38  
39  
40  
41  
42  
43  
44  
45  
46  
47

For peer review only
