# Supplementary material for: Enablers and barriers to the implementation of socially assistive humanoid robots in health and social care: a systematic review
Source: PubMed Central journal article supplement (PMC6955545; doi:10.1136/bmjopen-2019-033096), 2020-01-09
Supplement: bmjopen-2019-033096supp001.pdf [file bmjopen-2019-033096supp001.pdf]

**DATA EXTRACTION TABLE**

Name of study:

Assessor

|                                                   |
|---------------------------------------------------|
| <b>Interventions: dose/frequency/duration etc</b> |
| <b><u>Intervention</u></b>                        |
| <b><u>Comparator</u></b>                          |

|                                                                                                                                                                                   |     |      |                |
|-----------------------------------------------------------------------------------------------------------------------------------------------------------------------------------|-----|------|----------------|
| <b>Outcome measures according to us, of our review (not from authors of study)</b>                                                                                                |     |      |                |
| <b>1. Primary outcomes</b>                                                                                                                                                        |     |      |                |
| The identification of a <u>comprehensive listing of enablers and barriers</u> to the implementation of Socially Assistive Humanoid Robots (SAHR) in health and social care.       |     |      |                |
| Barriers: those impeding the implementation of SAHR which may include factors, issues or themes at local, system or policy level.                                                 |     |      |                |
| Enablers: <u>mechanisms and initiatives</u> whereby <u>patients' providers or policy makers</u> contribute to facilitating the <u>positive uptake and implementation</u> of SAHR. |     |      |                |
| <b>2. Secondary outcomes</b>                                                                                                                                                      |     |      |                |
| The insights from these enablers and barriers and their impact.                                                                                                                   |     |      |                |
| Gaps and future developments to inform further research.                                                                                                                          |     |      |                |
| <b>Principal outcome measures: (from the authors in the study)</b>                                                                                                                |     |      |                |
| a) ...                                                                                                                                                                            |     |      |                |
| b) ...                                                                                                                                                                            |     |      |                |
| c) ...                                                                                                                                                                            |     |      |                |
| <b>What were the results of these outcome measures?</b>                                                                                                                           |     |      |                |
| <b>Measure a)</b>                                                                                                                                                                 |     |      |                |
|                                                                                                                                                                                   | Pre | Post |                |
| 1.                                                                                                                                                                                |     |      | Fisher's exact |
| 2.                                                                                                                                                                                |     |      |                |
| <b>Measure b) and c)</b>                                                                                                                                                          |     |      |                |
| <b>Barriers</b>                                                                                                                                                                   |     |      |                |
|                                                                                                                                                                                   |     |      |                |
| <b>Enablers</b>                                                                                                                                                                   |     |      |                |
|                                                                                                                                                                                   |     |      |                |
| <b>Gaps and future developments</b>                                                                                                                                               |     |      |                |
|                                                                                                                                                                                   |     |      |                |
|                                                                                                                                                                                   |     |      |                |

|                                      |        |
|--------------------------------------|--------|
| <b><u>SUMMARY</u></b>                |        |
| Identified Enablers from this study: | 1. ... |
|                                      | 2. ... |
| Identified Barriers:                 | 1. ... |
|                                      | 2. ... |
| <b>Conclusive remarks</b>            |        |
| <b>Useful References</b>             |        |
|                                      |        |
